# Supplementary material for: Yeast Mitochondrial Biogenesis: A Role for the PUF RNA-Binding Protein Puf3p in mRNA Localization
Source: PLoS One. 2008 Jun 4;3(6):e2293. doi: 10.1371/journal.pone.0002293 (PMC2387061; doi:10.1371/journal.pone.0002293)
Supplement: Table S1 — MLR properties of the mRNAs coding for mitochondrial products. The genes are grouped in functional modules following the work by Steinmetz group (Perocchi F, Jensen LJ, Gagneur J, Ahting U, von Mering C, et al. (2006). PLoS Genet 2: e170). Four MLR classes of RNA are distinguished by different colours. Class I and class II are mRNAs whose statistical analyses (SAM q values) indicate an asymmetrical localization. This mitochondrial localization is dependent or independent of the mRNA binding protein Puf3p, respectively. Class III corresponds to mRNAs translated on cytoplasmically-free ribosomes and class IV are mRNAs encoded in the mitochondrial genome. The MLR values (% of Mitochondrial Localization of mRNA) are represented for the wild type cell in standard growth conditions or with either cycloheximide or puromycin. The mutant strain Δpuf3 has also been analyzed. The decision whether a gene has prokaryotic homologue is from SGD database. Puf3p binding site is from the data of (Foat BC, Houshmandi SS, Olivas WM, Bussemaker HJ (2005) Proc Natl Acad Sci USA 102: 17675–17680) and (Gerber AP, Herschlag D, Brown PO (2004) PLoS Biol 2: E79). Puf3p target signifies that the corresponding mRNA has been retained in affinity chromatography with Puf3p (Gerber AP, Herschlag D, Brown PO (2004) PLoS Biol 2: E79). (0.38 MB XLS) [file pone.0002293.s008.xls]

## Sheet: Total
SYSTEMATIC NAME	Module Number	Module name	Standard Name	SAM analysis	SAM q value	MLR (%localisation)	MLR + cycloheximide (%)	MLR + puromycin (%)	MLR Dpuf3 (%)	Procaryotic homologue	Puf3p binding site	Puf3p target	MLR Classification
Q0045	1	RCC-IV	COX1	Localized	<10E-06	100	100	100	100	Yes	No	NA	Class IV
Q0250	1	RCC-IV	COX2	Localized	<10E-06	100	100	100	100	Yes	No	NA	Class IV
Q0275	1	RCC-IV	COX3	Localized	<10E-06	100	100	100	100	Yes	No	NA	Class IV
YGR234W	1	RCC-IV	YHB1	undetermined	0.154	29.5	2.5	17.9	22.31	Yes	No	NA	Class II
YDL067C	1	RCC-IV	COX9	Not localized	0.000424	0	0	4.9	0	No	No	NA	Class III
YEL039C	1	RCC-IV	CYC7	Not localized	<10E-06	0	0	0	0	Yes	No	NA	Class III
YGL187C	1	RCC-IV	COX4	Not localized	0.000957	0	0	0	0	No	No	NA	Class III
YGL191W	1	RCC-IV	COX13	Not localized	<10E-06	0	0	0	0	No	No	NA	Class III
YHR051W	1	RCC-IV	COX6	Not localized	<10E-06	0	0	0	0	No	No	NA	Class III
YIL111W	1	RCC-IV	COX5B	Not localized	<10E-06	0	0	0	0	No	No	NA	Class III
YLR038C	1	RCC-IV	COX12	Not localized	<10E-06	0	0	0.4	0	No	No	NA	Class III
YLR395C	1	RCC-IV	COX8	Not localized	0.0051	0	0	0	0	No	Yes	NA	Class III
YMR256C	1	RCC-IV	COX7	Not localized	<10E-06	0	0	0	0	No	No	NA	Class III
YNL052W	1	RCC-IV	COX5A	Not localized	<10E-06	0	0.5	0	0	No	No	NA	Class III
YKR016W	2	NA	FMP13	Localized	<10E-06	80.6	28.1	0.8	69.58	Yes	Yes	NA	Class I-2
YHR017W	2	NA	YSC83	undetermined	0.0881	11.8	3.9	4.8	15.17	Yes	No	NA	Class II
YNR020C	3	NA	YNR020C	Localized	0.00372	13.8	7.6	10.1	7.77	Yes	Yes	Yes	Class I-1
YLR201C	3	NA	FMP53	undetermined	0.14	2.6	15.3	0.8	3.18	Yes	Yes	NA	Class III
YOR222W	5	NA	ODC2	Localized	<10E-06	24.1	1.7	38	28.91	No	Yes	NA	Class I-2
YJR085C	5	NA	YJR085C	Not localized	<10E-06	0	2.1	1.4	0	Yes	No	NA	Class III
YOR147W	6	Mito,org,andmorph,	MDM32	Localized	<10E-06	60.5	15	2.4	77.32	No	Yes	NA	Class I-2
YHR194W	6	Mito,org,andmorph,	MDM31	Localized	<10E-06	52.6	17.2	11.9	56.06	No	Yes	NA	Class I-2
YGL219C	6	Mito,org,andmorph,	MDM34	Localized	0.00265	11.9	12.4	0	28.7	No	Yes	NA	Class I-2
YAL010C	6	Mito,org,andmorph,	MDM10	Localized	<10E-06	57.3	7.5	0	53.76	No	No	NA	Class II
YLL006W	6	Mito,org,andmorph,	MMM1	Localized	<10E-06	42.1	18.3	5.6	55.94	No	No	NA	Class II
YGR231C	6	Mito,org,andmorph,	PHB2	Localized	<10E-06	25.4	19	6.6	22.29	Yes	No	NA	Class II
YGR132C	6	Mito,org,andmorph,	PHB1	undetermined	0.0953	0	4.3	2.8	0	Yes	Yes	NA	Class III
YJL066C	6	Mito,org,andmorph,	MPM1	Not localized	0.000836	0	1.1	0	0	No	Yes	NA	Class III
YOL009C	6	Mito,org,andmorph,	MDM12	Not localized	<10E-06	0	0.5	1.2	0	No	No	NA	Class III
YBR003W	7	Ubiquinonemet,	COQ1	Localized	<10E-06	100	19.8	15.3	81.68	Yes	Yes	NA	Class I-2
YGL119W	7	Ubiquinonemet,	ABC1	Localized	<10E-06	71.9	29.8	15.1	95.3	Yes	Yes	NA	Class I-2
YGR255C	7	Ubiquinonemet,	COQ6	Localized	<10E-06	69.9	35.2	3.3	70.27	Yes	Yes	NA	Class I-2
YOL096C	7	Ubiquinonemet,	COQ3	Localized	<10E-06	62.4	23.1	3.3	60.15	Yes	Yes	NA	Class I-2
YNR041C	7	Ubiquinonemet,	COQ2	Localized	<10E-06	88.7	23.1	0	85.18	Yes	No	NA	Class II
YPL109C	7	Ubiquinonemet,	YPL109C	Localized	<10E-06	82.8	19.5	4.9	81.56	Yes	No	NA	Class II
YLR056W	7	Ubiquinonemet,	ERG3	Localized	<10E-06	67.4	35.8	4.9	85.7	Yes	No	NA	Class II
YDR204W	7	Ubiquinonemet,	COQ4	Localized	<10E-06	61	30.3	8	58.57	Yes	No	NA	Class II
YML110C	7	Ubiquinonemet,	COQ5	Localized	<10E-06	59.8	39.5	1.9	72.87	Yes	No	NA	Class II
YOR125C	7	Ubiquinonemet,	CAT5	Localized	<10E-06	39.8	12.7	0.5	9.53	Yes	No	NA	Class II
YDR538W	7	Ubiquinonemet,	PAD1	Localized	0.000474	13.4	4.9	3.1	17.82	Yes	No	NA	Class II
YJR148W	8	Branchedchainaasyn,	BAT2	Localized	<10E-06	45.5	1.4	84.1	18.67	Yes	Yes	NA	Class I-2
YNL104C	8	Branchedchainaasyn,	LEU4	Localized	<10E-06	96.1	33.6	39	100	Yes	No	NA	Class II
YJR016C	8	Branchedchainaasyn,	ILV3	Localized	<10E-06	31.2	50.2	8.8	51.76	Yes	No	NA	Class II
YMR108W	8	Branchedchainaasyn,	ILV2	Localized	<10E-06	31	28.7	19	59.09	Yes	No	NA	Class II
YHR208W	8	Branchedchainaasyn,	BAT1	Localized	<10E-06	22.3	42.8	0	19.04	Yes	No	NA	Class II
YDR234W	8	Branchedchainaasyn,	LYS4	Localized	0.00042	14.4	15.7	9.2	31.92	Yes	No	NA	Class II
YBR176W	8	Branchedchainaasyn,	ECM31	Localized	0.00402	12.2	16.7	0	20.14	Yes	No	NA	Class II
YCL009C	8	Branchedchainaasyn,	ILV6	undetermined	NA	3	31.1	16.1	17.22	Yes	No	NA	Class III
YDL131W	8	Branchedchainaasyn,	LYS21	undetermined	NA	2.6	0.1	7.9	19.74	Yes	No	Yes	Class III
YLR355C	8	Branchedchainaasyn,	ILV5	Not localized	0.0025	0	15.5	0	14.94	Yes	No	NA	Class III
YIL098C	9	RCCasm1	FMC1	Localized	<10E-06	33.8	0	15	0	No	Yes	Yes	Class I-1
YDR375C	9	RCCasm1	BCS1	Localized	0.000412	30.9	7.8	7.3	5.46	Yes	Yes	Yes	Class I-1
YJL180C	9	RCCasm1	ATP12	Localized	<10E-06	28.6	16.9	4.2	1.17	Yes	Yes	NA	Class I-1
YGR257C	9	RCCasm1	MTM1	Localized	0.012	8.6	3.8	8.8	5.85	No	Yes	Yes	Class I-1
YNL315C	9	RCCasm1	ATP11	Localized	<10E-06	42.7	8.2	9.5	20.51	No	Yes	Yes	Class I-2
YDR350C	9	RCCasm1	TCM10	Localized	<10E-06	45.3	13.1	1.1	54.38	No	No	NA	Class II
YER017C	10	Mito,proteintargeting	AFG3	Localized	<10E-06	100	39.3	20.9	100	Yes	Yes	NA	Class I-2
YMR089C	10	Mito,proteintargeting	YTA12	Localized	<10E-06	100	43.9	11.2	100	Yes	Yes	NA	Class I-2
YBR185C	10	Mito,proteintargeting	MBA1	Localized	<10E-06	66	27.2	4.8	72.2	No	Yes	Yes	Class I-2
YGR028W	10	Mito,proteintargeting	MSP1	Localized	0.00108	23.6	7.1	2.1	12.37	Yes	Yes	Yes	Class I-2
YLR450W	10	Mito,proteintargeting	HMG2	Localized	<10E-06	77	25	10.1	82.42	Yes	No	NA	Class II
YKL218C	11	NA	SRY1	Localized	0.000162	18.5	4.9	49.6	24.64	Yes	No	NA	Class II
YOL071W	11	NA	EMI5	undetermined	0.275	2.1	3.7	4.6	0	Yes	Yes	Yes	Class III
YMR207C	12	Fattyacidsyn,	HFA1	Localized	<10E-06	69.3	22.1	5.3	64.5	Yes	Yes	NA	Class I-2
YER061C	12	Fattyacidsyn,	CEM1	Localized	<10E-06	27.8	19.1	4.8	58.63	Yes	No	NA	Class II
YKL182W	12	Fattyacidsyn,	FAS1	Not localized	0.00108	0	2.3	0	35.47	Yes	No	NA	Class III
YPL231W	12	Fattyacidsyn,	FAS2	undetermined	0.195	0	1.1	5.6	34.89	Yes	No	NA	Class III
YDR214W	12	Fattyacidsyn,	AHA1	Not localized	0.00897	0	0	0	8.37	Yes	No	NA	Class III
YDL198C	13	NA	GGC1	Localized	<10E-06	38.4	4.2	12.8	26.72	No	No	NA	Class II
YER057C	13	NA	HMF1	Not localized	<10E-06	0	0	0	0	Yes	No	NA	Class III
YIL051C	13	NA	MMF1	Not localized	<10E-06	0	0	0	0	Yes	No	NA	Class III
YMR072W	13	NA	ABF2	Not localized	<10E-06	0	1.9	8.5	0	No	No	NA	Class III
YPR140W	14	NA	TAZ1	Localized	<10E-06	53.7	6.2	2.9	57.99	Yes	Yes	Yes	Class I-2
YJR100C	14	NA	YJR100C	Localized	<10E-06	49.8	19.3	6	57.05	Yes	Yes	NA	Class I-2
YLR253W	14	NA	YLR253W	Localized	<10E-06	33.6	11.5	9.4	22.91	Yes	Yes	Yes	Class I-2
YOR232W	15	Matrixproteinimport	MGE1	Localized	<10E-06	31.2	17.9	3.6	0.27	Yes	Yes	NA	Class I-1
YOR020C	15	Matrixproteinimport	HSP10	undetermined	0.0549	8.7	0	9.6	0	Yes	Yes	Yes	Class I-1
YJR045C	15	Matrixproteinimport	SSC1	Localized	<10E-06	63	28	18	31.19	Yes	No	Yes	Class I-2
YDR258C	15	Matrixproteinimport	HSP78	Localized	<10E-06	32.5	14	7.1	44.45	Yes	Yes	NA	Class I-2
YLR259C	15	Matrixproteinimport	HSP60	Localized	<10E-06	22.4	39.1	0.7	24.56	Yes	Yes	Yes	Class I-2
YBL022C	15	Matrixproteinimport	PIM1	undetermined	0.0746	15.2	33.3	0.1	31.62	Yes	Yes	NA	Class I-2
YFL016C	15	Matrixproteinimport	MDJ1	Localized	<10E-06	65.2	32.4	9.6	64.34	Yes	No	NA	Class II
YBR227C	15	Matrixproteinimport	MCX1	Localized	<10E-06	50.5	29.2	11	64.93	Yes	No	NA	Class II
YEL030W	15	Matrixproteinimport	ECM10	Localized	0.0141	8.2	4.5	2.9	6.87	Yes	No	NA	Class II
YGR046W	15	Matrixproteinimport	YGR046W	Not localized	0.00897	0	10.3	0	0	Yes	No	NA	Class III
YJL104W	16	Tim23/Tim22complex	PAM16	Localized	<10E-06	17.6	0.9	6.3	0	Yes	No	Yes	Class I-1
YLR008C	16	Tim23/Tim22complex	PAM18	undetermined	0.247	17.3	0	0	0	Yes	Yes	Yes	Class I-1
YOR297C	16	Tim23/Tim22complex	TIM18	Localized	0.0111	9.1	2.1	0	5.84	Yes	Yes	NA	Class I-1
YHR005C-A	16	Tim23/Tim22complex	MRS11	undetermined	0.275	8.2	0	3.3	0	No	Yes	Yes	Class I-1
YIL022W	16	Tim23/Tim22complex	TIM44	Localized	<10E-06	89.6	28.3	24.4	100	Yes	Yes	Yes	Class I-2
YJL054W	16	Tim23/Tim22complex	TIM54	Localized	<10E-06	57.4	18	0	55.2	Yes	Yes	NA	Class I-2
YPL063W	16	Tim23/Tim22complex	TIM50	Localized	<10E-06	100	31.6	13.1	100	No	No	NA	Class II
YGR033C	16	Tim23/Tim22complex	TIM21	Localized	<10E-06	26.6	11.6	6.7	25.23	No	No	NA	Class II
YDL217C	16	Tim23/Tim22complex	TIM22	undetermined	0.241	4.5	3.3	1.3	1.84	No	Yes	NA	Class III
YGR178C	16	Tim23/Tim22complex	PBP1	undetermined	0.303	4	1.9	8.6	3.3	No	No	NA	Class III
YJL143W	16	Tim23/Tim22complex	TIM17	undetermined	0.247	1.2	0.4	2.1	0	No	Yes	Yes	Class III
YBR091C	16	Tim23/Tim22complex	MRS5	undetermined	0.147	0	0	0	0	No	Yes	NA	Class III
YEL020W-A	16	Tim23/Tim22complex	TIM9	Not localized	0.00897	0	0	0	0	No	Yes	Yes	Class III
YGR181W	16	Tim23/Tim22complex	TIM13	Not localized	0.0154	0	0	3	0	No	Yes	NA	Class III
YJR135W-A	16	Tim23/Tim22complex	TIM8	undetermined	0.103	0	0	7	0	No	Yes	NA	Class III
YNR017W	16	Tim23/Tim22complex	MAS6	undetermined	0.0953	0	0.8	4.3	0	No	Yes	Yes	Class III
YMR267W	17	Unknown2	PPA2	Localized	0.000725	28.9	7.6	13.2	7.39	Yes	Yes	NA	Class I-1
YNL122C	17	Unknown2	YNL122C	Localized	0.019	15.4	0	3.4	0	Yes	Yes	Yes	Class I-1
YEL006W	17	Unknown2	YEL006W	undetermined	NA	1.9	2	0	17.21	No	No	NA	Class III
YLR125W	17	Unknown2	YLR125W	undetermined	0.3	0.8	1.8	5.4	6.62	No	No	NA	Class III
YDR493W	17	Unknown2	FMP36	undetermined	0.147	0	0	0	0	No	Yes	NA	Class III
YDR511W	18	NA	ACN9	undetermined	0.161	6	0.7	1	0	No	Yes	Yes	Class III
YLR390W	18	NA	ECM19	undetermined	NA	1.1	0	5	0	No	Yes	NA	Class III
YDR512C	18	NA	EMI1	Not localized	<10E-06	0	0.6	0	0	No	No	NA	Class III
YDR232W	19	NA	HEM1	Localized	<10E-06	37.6	30	9.2	69.92	Yes	No	NA	Class II
YIL094C	19	NA	LYS12	Localized	<10E-06	24.4	27	4.8	35.84	Yes	No	NA	Class II
YBR121C	19	NA	GRS1	undetermined	0.161	13.1	4.9	4	25.81	Yes	No	NA	Class II
YNL313C	19	NA	YNL313C	undetermined	0.247	0	2.6	0	11.1	Yes	No	NA	Class III
YPL252C	20	Iron-sulfurclusterasm	YAH1	Localized	0.000302	24.2	1.5	7.5	0	Yes	No	Yes	Class I-1
YGL018C	20	Iron-sulfurclusterasm	JAC1	Localized	0.000288	16.9	9.3	5.3	4.6	Yes	Yes	NA	Class I-1
YPR067W	20	Iron-sulfurclusterasm	ISA2	Localized	0.0111	9.4	2.3	7.7	3.14	Yes	Yes	Yes	Class I-1
YDR376W	20	Iron-sulfurclusterasm	ARH1	Localized	<10E-06	81	15.2	11.2	53.47	Yes	Yes	NA	Class I-2
YER141W	20	Iron-sulfurclusterasm	COX15	Localized	<10E-06	78	36.7	11.3	100	Yes	Yes	Yes	Class I-2
YCL017C	20	Iron-sulfurclusterasm	NFS1	Localized	<10E-06	73	39.7	11.9	100	Yes	No	NA	Class II
YLR369W	20	Iron-sulfurclusterasm	SSQ1	Localized	<10E-06	58.9	27.6	4.8	47.43	Yes	No	NA	Class II
YPL135W	20	Iron-sulfurclusterasm	ISU1	Localized	0.00444	14.1	0	32.1	11.9	Yes	No	NA	Class II
YLL027W	20	Iron-sulfurclusterasm	ISA1	undetermined	0.26	3	5.5	2	7.75	Yes	No	NA	Class III
YOR226C	20	Iron-sulfurclusterasm	ISU2	Not localized	0.00811	0	2.3	0	2.98	Yes	No	NA	Class III
YKL040C	20	Iron-sulfurclusterasm	NFU1	Not localized	0.0051	0	16.2	3.3	1.26	Yes	Yes	NA	Class III
YDL120W	20	Iron-sulfurclusterasm	YFH1	undetermined	0.067	0	0.8	0	0	Yes	No	NA	Class III
YPL059W	20	Iron-sulfurclusterasm	GRX5	Not localized	<10E-06	0	0	0	0	Yes	Yes	Yes	Class III
YOR040W	21	NA	GLO4	Not localized	0.0111	0	6.9	7.5	3.96	Yes	No	NA	Class III
YDR272W	21	NA	GLO2	Not localized	<10E-06	0	0.2	1	0	Yes	No	NA	Class III
YGR192C	21	NA	TDH3	Not localized	0.000302	0	0	0	0	Yes	No	NA	Class III
YMR098C	23	NA	YMR098C	Localized	<10E-06	98.1	33.2	1.9	93.87	Yes	Yes	Yes	Class I-2
YPL072W	23	NA	UBP16	Localized	<10E-06	21.7	9.2	0	19.35	No	Yes	Yes	Class I-2
YJR109C	24	Glutaminefamilymet,	CPA2	Localized	<10E-06	28.6	3.4	48	49.63	Yes	No	NA	Class II
YJL130C	24	Glutaminefamilymet,	URA2	Not localized	0.0256	0	3	0	26.55	Yes	No	NA	Class III
YBL039C	24	Glutaminefamilymet,	URA7	Not localized	0.0111	0	1.2	2.9	3.81	Yes	No	NA	Class III
YBR291C	24	Glutaminefamilymet,	CTP1	Not localized	<10E-06	0	1	0	0	No	No	NA	Class III
YOR303W	24	Glutaminefamilymet,	CPA1	Not localized	<10E-06	0	0	0	0	Yes	No	NA	Class III
YPL215W	25	NA	CBP3	Localized	<10E-06	21.9	17.7	8.6	6.29	Yes	Yes	NA	Class I-1
YBR163W	25	NA	DEM1	Localized	0.0134	10	9.1	2.9	12.5	No	No	NA	Class II
YGR174C	25	NA	CBP4	undetermined	0.298	1.5	3.4	9.1	0	Yes	Yes	NA	Class III
YIL077C	26	NA	YIL077C	Localized	0.000298	14.8	5.6	18.6	12.9	No	Yes	NA	Class I-2
YJL060W	26	NA	BNA3	Localized	<10E-06	49.2	21.3	1.3	57.41	Yes	No	NA	Class II
YFL030W	26	NA	AGX1	Not localized	0.000156	0	1.5	0	0	Yes	No	NA	Class III
YLR283W	27	Unknown1	YLR283W	undetermined	0.228	2.3	11.5	0	1.47	Yes	Yes	NA	Class III
YLR281C	27	Unknown1	YLR281C	Not localized	0.00108	0	10.6	0	1.03	Yes	No	NA	Class III
YJL003W	27	Unknown1	COX16	Not localized	0.00746	0	4.7	3	0	No	Yes	NA	Class III
YLR290C	27	Unknown1	YLR290C	Not localized	0.00223	0	8.2	3.4	0	Yes	No	NA	Class III
YNL133C	27	Unknown1	FYV6	Not localized	<10E-06	0	0.5	0	0	No	No	NA	Class III
YPR061C	27	Unknown1	JID1	Not localized	<10E-06	0	6.4	0	0	Yes	No	NA	Class III
YMR166C	28	RCCasm2	YMR166C	Localized	0.000303	21.2	2.1	2.3	4.14	No	Yes	Yes	Class I-1
YLR139C	28	RCCasm2	SLS1	Localized	<10E-06	55.8	27.9	10.1	49.08	No	Yes	Yes	Class I-2
YOL027C	28	RCCasm2	MDM38	Localized	<10E-06	54.4	15.6	11.7	43.28	No	Yes	NA	Class I-2
YLR091W	28	RCCasm2	YLR091W	Localized	<10E-06	24.1	8.1	9.8	10.81	No	No	Yes	Class I-2
YLR393W	28	RCCasm2	ATP10	Localized	<10E-06	86.5	31	6.5	100	No	No	NA	Class II
YKL157W	29	NA	APE2	Localized	<10E-06	37.7	28.1	2.6	84.3	Yes	No	NA	Class II
YPL004C	29	NA	LSP1	Localized	0.000725	19.3	0	49.4	7.4	Yes	No	NA	Class II
YNL169C	30	Mito,/cyt,lipidmet,	PSD1	Localized	<10E-06	72.9	15.2	20.2	67.32	Yes	Yes	NA	Class I-2
YDL015C	30	Mito,/cyt,lipidmet,	TSC13	Localized	<10E-06	55.1	35.9	6.7	87.64	Yes	No	NA	Class II
YMR241W	30	Mito,/cyt,lipidmet,	YHM2	Localized	<10E-06	26.3	12.1	0	37.71	No	No	NA	Class II
YKL120W	30	Mito,/cyt,lipidmet,	OAC1	undetermined	0.26	1.8	3.8	0	25.42	No	No	NA	Class III
YIL124W	30	Mito,/cyt,lipidmet,	AYR1	Not localized	<10E-06	0	0	0	0	Yes	No	NA	Class III
YOL033W	31	Glutamatesyn,	MSE1	Localized	<10E-06	58.7	28.9	7.6	58.97	Yes	Yes	Yes	Class I-2
YHR037W	31	Glutamatesyn,	PUT2	Localized	0.000293	19.9	38.7	1.7	32.2	Yes	No	NA	Class II
YLR089C	31	Glutamatesyn,	ALT1	undetermined	NA	1.5	18.8	0	21.25	Yes	No	NA	Class III
YOR335C	31	Glutamatesyn,	ALA1	undetermined	0.0549	0	6.9	0	24.04	Yes	Yes	NA	Class III
YDL171C	31	Glutamatesyn,	GLT1	Not localized	0.000671	0	3.1	0	12.31	Yes	No	NA	Class III
YAL062W	31	Glutamatesyn,	GDH3	Not localized	<10E-06	0	2.1	5	2.58	Yes	No	NA	Class III
YDR316W	32	RCCasm3	OMS1	Localized	<10E-06	100	17.6	9.2	84.14	Yes	Yes	Yes	Class I-2
YER154W	32	RCCasm3	OXA1	Localized	<10E-06	67.4	23.4	13.6	74.53	Yes	Yes	Yes	Class I-2
YKR087C	32	RCCasm3	OMA1	Localized	<10E-06	24.6	12.2	0	35.81	Yes	No	NA	Class II
YLR087C	34	NA	CSF1	Localized	<10E-06	43.6	18.2	7.6	46.65	No	No	NA	Class II
YKL212W	34	NA	SAC1	Not localized	0.019	0	5	0	11.82	No	No	NA	Class III
YKL190W	34	NA	CNB1	Not localized	<10E-06	0	3	0	0	No	No	NA	Class III
YPL069C	34	NA	BTS1	Not localized	0.00897	0	0.3	0	0	Yes	No	NA	Class III
YJR144W	35	ResponsetoDNAdamage	MGM101	Localized	<10E-06	55.8	20.5	0	29.94	No	No	NA	Class II
YGR094W	35	ResponsetoDNAdamage	VAS1	Localized	0.000156	20.2	9.6	5.2	42.75	Yes	No	NA	Class II
YNL312W	35	ResponsetoDNAdamage	RFA2	Not localized	<10E-06	0	0.4	8.5	1.79	No	No	NA	Class III
YDR499W	35	ResponsetoDNAdamage	LCD1	Not localized	0.0164	0	2.2	1.9	1.18	No	No	NA	Class III
YBR136W	35	ResponsetoDNAdamage	MEC1	Not localized	0.00444	0	1.4	0	0.54	No	No	NA	Class III
YCR028C-A	35	ResponsetoDNAdamage	RIM1	Not localized	0.00137	0	0	3.6	0	Yes	Yes	NA	Class III
YMR234W	35	ResponsetoDNAdamage	RNH1	Not localized	0.0141	0	2.7	0	0	Yes	No	NA	Class III
YJL005W	36	NA	CYR1	undetermined	0.169	13.6	6.8	8	16.01	Yes	No	NA	Class II
YOL081W	36	NA	IRA2	undetermined	0.296	0.5	7.1	11.9	11.66	No	Yes	NA	Class III
YBR044C	37	Pyr,/?-ketoglutaratedehy,	TCM62	Localized	<10E-06	70.2	21.4	6.7	54.2	Yes	Yes	NA	Class I-2
YBR221C	37	Pyr,/?-ketoglutaratedehy,	PDB1	Localized	<10E-06	46.4	56.5	10.3	79.84	Yes	Yes	NA	Class I-2
YNL071W	37	Pyr,/?-ketoglutaratedehy,	LAT1	Localized	<10E-06	43.1	38.2	0	39.66	Yes	Yes	NA	Class I-2
YDR430C	37	Pyr,/?-ketoglutaratedehy,	CYM1	Localized	<10E-06	42	25.6	8.3	35.52	Yes	Yes	Yes	Class I-2
YFL018C	37	Pyr,/?-ketoglutaratedehy,	LPD1	Localized	<10E-06	26.9	28.5	6.8	37.45	Yes	No	NA	Class II
YIL125W	37	Pyr,/?-ketoglutaratedehy,	KGD1	Localized	<10E-06	24.8	41.6	2.6	43.25	Yes	No	NA	Class II
YDR148C	37	Pyr,/?-ketoglutaratedehy,	KGD2	Localized	<10E-06	24.5	43.1	0	55.97	Yes	No	NA	Class II
YDR069C	37	Pyr,/?-ketoglutaratedehy,	DOA4	undetermined	0.183	9.8	2	8.8	7.52	No	No	NA	Class II
YBR208C	37	Pyr,/?-ketoglutaratedehy,	DUR1,2	undetermined	0.127	7.3	4.8	8.3	15.96	Yes	Yes	NA	Class III
YGR193C	37	Pyr,/?-ketoglutaratedehy,	PDX1	undetermined	NA	3.8	18.6	3.5	3.13	Yes	No	NA	Class III
YKL029C	37	Pyr,/?-ketoglutaratedehy,	MAE1	undetermined	0.215	0	15.1	4.8	26.04	Yes	No	NA	Class III
YER178W	37	Pyr,/?-ketoglutaratedehy,	PDA1	Not localized	0.00108	0	32.1	8	7.73	Yes	No	NA	Class III
YBL064C	37	Pyr,/?-ketoglutaratedehy,	PRX1	Not localized	0.0164	0	20.2	0	5.52	Yes	No	NA	Class III
YGR021W	38	NA	YGR021W	Localized	<10E-06	48.9	17	3.2	5.48	Yes	Yes	Yes	Class I-1
YLR090W	38	NA	XDJ1	Localized	0.0108	10.2	5.8	2.5	3.96	Yes	Yes	Yes	Class I-1
YIL134W	38	NA	FLX1	Localized	0.0428	8.9	2	0	1.12	No	Yes	Yes	Class I-1
YNL168C	40	NA	FMP41	Localized	<10E-06	51	23.9	4.1	58.02	Yes	No	NA	Class II
YLR351C	40	NA	NIT3	Not localized	0.000293	0	7.1	3.7	0	Yes	No	NA	Class III
YIL070C	41	DNAreplication	MAM33	Localized	<10E-06	100	25.8	2.3	60.46	No	Yes	Yes	Class I-2
YER170W	41	DNAreplication	ADK2	Localized	<10E-06	32.2	9.5	8.3	6.24	Yes	No	NA	Class II
YIL066C	41	DNAreplication	RNR3	Localized	0.012	8.1	3.7	28.5	10.97	Yes	No	NA	Class II
YJR140C	41	DNAreplication	HIR3	undetermined	0.298	3.6	4	0.6	10	Yes	Yes	NA	Class III
YJL026W	41	DNAreplication	RNR2	Not localized	0.00174	0	0	8.6	12.33	Yes	No	NA	Class III
YER070W	41	DNAreplication	RNR1	Not localized	<10E-06	0	0.2	0	11.93	Yes	No	NA	Class III
YGR180C	41	DNAreplication	RNR4	Not localized	0.00402	0	0.5	7.8	4.26	Yes	No	NA	Class III
YDR226W	41	DNAreplication	ADK1	Not localized	<10E-06	0	0	0	0	Yes	No	NA	Class III
YBR026C	43	NA	ETR1	Localized	<10E-06	56.7	38	8.9	72.13	Yes	No	NA	Class II
YDL027C	43	NA	YDL027C	Localized	<10E-06	31.6	28.7	0	44.64	No	No	NA	Class II
YML078W	43	NA	CPR3	Not localized	<10E-06	0	4.9	0	0	Yes	No	NA	Class III
YDR019C	46	Folateandglycinemet,	GCV1	Localized	<10E-06	66.4	30.4	0.6	100	Yes	No	NA	Class II
YBR084W	46	Folateandglycinemet,	MIS1	Localized	<10E-06	64.3	34	8.8	82.65	Yes	No	NA	Class II
YBR263W	46	Folateandglycinemet,	SHM1	Localized	<10E-06	61.9	44.3	15.7	82.69	Yes	No	NA	Class II
YGL125W	46	Folateandglycinemet,	MET13	undetermined	0.0549	12.4	3.5	24.1	12.8	Yes	No	NA	Class II
YPL023C	46	Folateandglycinemet,	MET12	undetermined	0.0953	6.9	2.2	14.1	9.45	Yes	No	NA	Class III
YNL256W	46	Folateandglycinemet,	FOL1	undetermined	0.29	3.6	12.8	0	25.11	Yes	No	NA	Class III
YMR189W	46	Folateandglycinemet,	GCV2	undetermined	0.0816	0	12.9	0	19.69	Yes	No	NA	Class III
YGR204W	46	Folateandglycinemet,	ADE3	undetermined	0.161	0	1.2	11.9	17.11	Yes	No	NA	Class III
YAL044C	46	Folateandglycinemet,	GCV3	Not localized	<10E-06	0	0.2	0	0	Yes	Yes	NA	Class III
YER183C	46	Folateandglycinemet,	FAU1	Not localized	<10E-06	0	1.5	0	0	Yes	No	NA	Class III
YBR262C	47	NA	FMP51	undetermined	0.296	1.9	0.4	6.6	0	No	Yes	Yes	Class III
YGL226W	47	NA	YGL226W	undetermined	0.29	1.4	3.5	5.8	0	No	Yes	Yes	Class III
YDL142C	48	Glycerolmet,	CRD1	Localized	<10E-06	52.6	12.7	3.5	46.76	Yes	Yes	NA	Class I-2
YCL004W	48	Glycerolmet,	PGS1	Localized	0.000158	18	7.8	1.4	21.64	Yes	Yes	NA	Class I-2
YBR029C	48	Glycerolmet,	CDS1	Localized	<10E-06	58.8	27.8	1.6	88.66	Yes	No	NA	Class II
YIL155C	48	Glycerolmet,	GUT2	Localized	<10E-06	52.9	32.2	3.3	94.73	Yes	No	NA	Class II
YHL032C	48	Glycerolmet,	GUT1	Localized	<10E-06	30.4	8.9	38.7	29.4	Yes	No	NA	Class II
YOL059W	48	Glycerolmet,	GPD2	Localized	0.00339	9.3	4.2	26.1	31.22	Yes	No	NA	Class II
YDL022W	48	Glycerolmet,	GPD1	Not localized	<10E-06	0	0	0	0	Yes	No	NA	Class III
YPL206C	48	Glycerolmet,	YPL206C	Not localized	<10E-06	0	0.9	0	0	Yes	No	NA	Class III
YGR082W	49	TOMcomplex	TOM20	Localized	0.000298	17.2	5.7	4.5	7.07	No	Yes	NA	Class I-1
YPR133W-A	49	TOMcomplex	TOM5	Localized	0.0141	10.4	0	6.4	0	No	Yes	NA	Class I-1
YNL026W	49	TOMcomplex	SAM50	Localized	0.0025	12.4	4.8	0	24.68	Yes	No	Yes	Class I-2
YNL121C	49	TOMcomplex	TOM70	Localized	<10E-06	92.8	37.1	11.3	100	Yes	No	NA	Class II
YHR117W	49	TOMcomplex	TOM71	Localized	<10E-06	73.1	23.5	11.4	89.2	Yes	No	NA	Class II
YMR060C	49	TOMcomplex	SAM37	undetermined	0.26	4.8	1	2.9	3.66	Yes	No	NA	Class III
YOR045W	49	TOMcomplex	TOM6	undetermined	0.26	3.1	0	6.3	0	No	Yes	Yes	Class III
YNL131W	49	TOMcomplex	TOM22	undetermined	0.116	0.8	0	7.7	0	No	No	Yes	Class III
YMR203W	49	TOMcomplex	TOM40	undetermined	0.221	0	3.3	0	2.39	No	Yes	NA	Class III
YHR083W	49	TOMcomplex	SAM35	Not localized	0.00113	0	2.3	3.2	0	No	No	NA	Class III
YNL070W	49	TOMcomplex	TOM7	Not localized	0.0175	0	0	3.7	0	No	Yes	NA	Class III
YJL071W	51	Argsyn,	ARG2	Localized	<10E-06	54.4	18.3	11.9	67.26	Yes	No	Yes	Class I-2
YMR062C	51	Argsyn,	ECM40	Localized	<10E-06	70.5	38	26.2	81.87	Yes	No	NA	Class II
YER069W	51	Argsyn,	ARG5,6	Localized	<10E-06	33.1	27.8	11.6	68.89	Yes	No	NA	Class II
YOR130C	51	Argsyn,	ORT1	Localized	0.000162	20.9	0.5	22.2	17.49	No	No	NA	Class II
YOL140W	51	Argsyn,	ARG8	Localized	0.000229	17.9	11.3	0	37.5	Yes	No	NA	Class II
YNL310C	53	NA	ZIM17	Localized	0.000785	11.9	0.7	0.7	4.38	No	Yes	NA	Class I-1
YNL073W	53	NA	MSK1	Localized	<10E-06	36.7	10	5.7	12.37	Yes	Yes	Yes	Class I-2
YBR106W	55	NA	PHO88	Localized	<10E-06	42.3	28.5	0	56.21	No	No	NA	Class II
YAL046C	55	NA	YAL046C	Not localized	<10E-06	0	0	0	0	Yes	No	NA	Class III
YER014W	56	NA	HEM14	Localized	<10E-06	86.2	37	10.6	100	Yes	No	NA	Class II
YOR176W	56	NA	HEM15	Localized	0.00476	17.7	22.4	4.5	36.16	Yes	No	NA	Class II
YAL039C	56	NA	CYC3	undetermined	0.0746	0	1	2.3	0	No	Yes	Yes	Class III
YDR044W	56	NA	HEM13	Not localized	<10E-06	0	0	0	0	Yes	No	NA	Class III
YGR012W	59	NA	YGR012W	Localized	<10E-06	70.4	18.4	7.8	79.68	Yes	No	NA	Class II
YOR251C	59	NA	YOR251C	Not localized	<10E-06	0	4.4	0	1.33	Yes	No	NA	Class III
YDR194C	61	RNAsplicing	MSS116	Localized	<10E-06	94.4	29.1	18.4	100	Yes	Yes	Yes	Class I-2
YLR382C	61	RNAsplicing	NAM2	Localized	<10E-06	48.5	32.1	9.5	68.34	Yes	Yes	Yes	Class I-2
YDL044C	61	RNAsplicing	MTF2	Localized	<10E-06	44.6	12.8	0	25.08	No	Yes	Yes	Class I-2
YIR021W	61	RNAsplicing	MRS1	Localized	<10E-06	41.8	17.3	0.4	18.35	No	Yes	Yes	Class I-2
YOR334W	61	RNAsplicing	MRS2	Localized	<10E-06	39.6	9.7	0	39.42	Yes	Yes	NA	Class I-2
YGL236C	61	RNAsplicing	MTO1	Localized	<10E-06	36.6	20.1	16.3	12.58	Yes	Yes	Yes	Class I-2
YDL033C	61	RNAsplicing	SLM3	Localized	<10E-06	34	17.9	3	44.48	Yes	Yes	NA	Class I-2
YJL133W	61	RNAsplicing	MRS3	Localized	0.00476	14.1	1.5	13.7	12.56	No	No	NA	Class II
YKR052C	61	RNAsplicing	MRS4	Localized	0.00153	12.4	1.2	12.3	11.27	No	No	NA	Class II
YPR134W	61	RNAsplicing	MSS18	Localized	0.0141	9.6	18.7	11.6	19.74	No	No	NA	Class II
YMR023C	61	RNAsplicing	MSS1	undetermined	0.208	4.5	8.1	0	11.74	Yes	Yes	NA	Class III
YBR120C	62	Translat,regulatoractivity	CBP6	Localized	0.000296	41.4	0.4	0	0	No	Yes	Yes	Class I-1
YLR203C	62	Translat,regulatoractivity	MSS51	Localized	<10E-06	100	35.1	24	100	No	Yes	Yes	Class I-2
YMR282C	62	Translat,regulatoractivity	AEP2	Localized	<10E-06	94.5	21.1	1.5	81.49	No	Yes	Yes	Class I-2
YPL029W	62	Translat,regulatoractivity	SUV3	Localized	<10E-06	79.6	18.2	5.7	76.28	Yes	Yes	Yes	Class I-2
YNR045W	62	Translat,regulatoractivity	PET494	Localized	<10E-06	57.9	18.9	11.6	45.36	No	Yes	Yes	Class I-2
YMR287C	62	Translat,regulatoractivity	MSU1	Localized	<10E-06	54.9	36	0	59.4	Yes	Yes	Yes	Class I-2
YDR197W	62	Translat,regulatoractivity	CBS2	Localized	<10E-06	51.5	14	0	37.01	Yes	Yes	NA	Class I-2
YMR257C	62	Translat,regulatoractivity	PET111	Localized	<10E-06	33.1	10.4	0.1	8.32	No	Yes	Yes	Class I-2
YMR064W	62	Translat,regulatoractivity	AEP1	Localized	8.49e-05	24.2	11.3	2.5	12.66	No	Yes	NA	Class I-2
YLR067C	62	Translat,regulatoractivity	PET309	Localized	0.000288	23.9	22	0	15.76	Yes	Yes	Yes	Class I-2
YBL080C	62	Translat,regulatoractivity	PET112	Localized	<10E-06	23.4	20.5	12.5	10.63	Yes	Yes	Yes	Class I-2
YMR066W	62	Translat,regulatoractivity	SOV1	Localized	0.0025	19.2	9.9	0	11.11	No	Yes	NA	Class I-2
YDL069C	62	Translat,regulatoractivity	CBS1	Not localized	0.00281	0	5.3	0	0	No	No	NA	Class III
YER153C	62	Translat,regulatoractivity	PET122	Not localized	<10E-06	0	7.7	0	0	No	No	NA	Class III
YGR222W	62	Translat,regulatoractivity	PET54	undetermined	0.195	0	9.2	0	0	No	No	NA	Class III
YPL134C	63	NA	ODC1	Localized	0.000165	18.3	5.2	7.7	26.14	No	No	NA	Class II
YBR269C	63	NA	FMP21	Not localized	<10E-06	0	1.1	4.6	0	Yes	No	NA	Class III
YOR211C	64	Fusion/fission	MGM1	Localized	<10E-06	94.8	13.7	5.9	100	No	Yes	NA	Class I-2
YJL112W	64	Fusion/fission	MDV1	Localized	<10E-06	42.6	5.4	0.8	29.11	Yes	Yes	Yes	Class I-2
YDR470C	64	Fusion/fission	UGO1	Localized	<10E-06	29	6.4	4.4	7.71	No	No	NA	Class II
YLL001W	64	Fusion/fission	DNM1	Localized	0.00402	9.7	2.2	1.6	10.93	No	No	NA	Class II
YBR179C	64	Fusion/fission	FZO1	undetermined	0.253	5.1	2.7	0.6	7.7	Yes	Yes	Yes	Class III
YIL065C	64	Fusion/fission	FIS1	undetermined	0.26	1.2	1	4.6	0	Yes	No	NA	Class III
YOL023W	65	NA	IFM1	Localized	<10E-06	58.4	19.4	1.9	62.3	Yes	Yes	Yes	Class I-2
YNL292W	65	NA	PUS4	undetermined	0.0746	7.5	2.8	2.2	6.42	Yes	Yes	NA	Class III
YFL001W	65	NA	DEG1	undetermined	0.296	5.3	4.2	0	9.02	Yes	No	NA	Class III
YHR011W	66	aamet,	DIA4	Localized	<10E-06	99.1	24.3	9.4	70.76	Yes	Yes	Yes	Class I-2
YKL194C	66	aamet,	MST1	Localized	<10E-06	72.6	24.7	7.5	70.79	Yes	Yes	Yes	Class I-2
YER086W	66	aamet,	ILV1	Localized	<10E-06	62.4	47.8	14	100	Yes	No	NA	Class II
YCL064C	66	aamet,	CHA1	Localized	<10E-06	51.2	22.1	0	100	Yes	No	NA	Class II
YDR023W	66	aamet,	SES1	undetermined	0.0881	2.4	0	0	7.65	Yes	No	NA	Class III
YIL078W	66	aamet,	THS1	undetermined	NA	0.7	0.8	4	8.94	Yes	No	NA	Class III
YCR053W	66	aamet,	THR4	Not localized	0.01	0	2.3	1.2	11.34	Yes	No	NA	Class III
YGR155W	66	aamet,	CYS4	Not localized	0.00697	0	0.7	6.4	8.03	Yes	No	NA	Class III
YOR187W	67	NA	TUF1	Localized	<10E-06	100	51.9	27.2	100	Yes	Yes	Yes	Class I-2
YLR069C	67	NA	MEF1	Localized	<10E-06	100	51.8	22	100	Yes	Yes	Yes	Class I-2
YJL102W	67	NA	MEF2	Localized	<10E-06	74.9	38.5	9.8	82.3	Yes	No	Yes	Class I-2
YDL104C	68	NA	QRI7	Localized	<10E-06	41.3	15.5	0	43.89	Yes	Yes	NA	Class I-2
YDL119C	68	NA	YDL119C	Localized	<10E-06	30	5.2	0	21.48	No	No	NA	Class II
YLL009C	69	RCCasm4	COX17	Localized	0.00153	30.9	0	5.3	0	No	Yes	Yes	Class I-1
YPL172C	69	RCCasm4	COX10	Localized	<10E-06	93.4	26.9	14.6	96.17	Yes	Yes	Yes	Class I-2
YBR024W	69	RCCasm4	SCO2	Localized	<10E-06	73.7	21.7	2.6	44.58	Yes	Yes	Yes	Class I-2
YBR037C	69	RCCasm4	SCO1	Localized	<10E-06	72.7	20.4	16.5	41.18	Yes	Yes	NA	Class I-2
YPL132W	69	RCCasm4	COX11	Localized	<10E-06	59.2	16.1	5.8	47.16	Yes	Yes	Yes	Class I-2
YFR044C	70	NA	YFR044C	Localized	0.0175	17.1	33.3	9.1	35.02	Yes	Yes	NA	Class I-2
YBR069C	70	NA	TAT1	Localized	0.000731	21	23.7	47.6	76.43	Yes	No	NA	Class II
YJR077C	70	NA	MIR1	Localized	0.000424	19.6	9.3	4.7	41.27	No	No	NA	Class II
YNL064C	70	NA	YDJ1	Not localized	0.00561	0	0	0	7.09	Yes	Yes	NA	Class III
YKR066C	71	NA	CCP1	Localized	<10E-06	65.2	28.8	7	100	Yes	No	NA	Class II
YJR051W	71	NA	OSM1	Localized	<10E-06	55.1	31.7	0	58.02	Yes	No	NA	Class II
YJR048W	71	NA	CYC1	Localized	<10E-06	49.2	0	2.2	0	Yes	No	NA	Class II
YHL014C	73	NA	YLF2	Localized	<10E-06	36.3	11.6	2.1	27.02	Yes	Yes	Yes	Class I-2
YIL042C	73	NA	YIL042C	Localized	<10E-06	80	26.5	24.8	74.42	Yes	No	NA	Class II
YGR147C	74	NA	NAT2	Localized	<10E-06	51.5	14.5	8.7	35.59	No	Yes	Yes	Class I-2
YGR144W	74	NA	THI4	Not localized	<10E-06	0	0.3	0	0	Yes	No	NA	Class III
YOR317W	75	NA	FAA1	undetermined	0.253	1.6	0.9	0	26.92	Yes	No	NA	Class III
YBR177C	75	NA	EHT1	Not localized	0.0111	0	1	0	9.08	Yes	No	NA	Class III
YML008C	75	NA	ERG6	Not localized	<10E-06	0	1.8	0	6.05	Yes	No	NA	Class III
YGL059W	76	NA	YGL059W	Localized	<10E-06	20.1	14.9	2.2	18.25	Yes	Yes	NA	Class I-2
YJL161W	76	NA	FMP33	Not localized	<10E-06	0	0	0	0	No	No	NA	Class III
YNL100W	77	NA	YNL100W	Localized	0.0223	9.4	4.3	1.9	1.73	No	No	NA	Class II
YCL056C	77	NA	YCL056C	undetermined	0.234	0	4	3.3	1.69	No	No	NA	Class III
YDL157C	77	NA	YDL157C	Not localized	<10E-06	0	2.4	0	0	No	Yes	NA	Class III
YGL143C	78	NA	MRF1	Localized	<10E-06	71.7	22.8	6.3	80.49	Yes	Yes	Yes	Class I-2
YNL063W	78	NA	MTQ1	undetermined	0.195	10.8	7.2	5.7	9.77	Yes	Yes	NA	Class I-2
YGL169W	78	NA	SUA5	undetermined	0.169	0	3.2	0	10.56	Yes	Yes	NA	Class III
YJL096W	79	MRPL	MRPL49	Localized	<10E-06	50.7	1.2	4.3	0	Yes	Yes	Yes	Class I-1
YKL170W	79	MRPL	MRPL38	Localized	<10E-06	49.4	0.3	14.2	3.07	Yes	Yes	Yes	Class I-1
YLR439W	79	MRPL	MRPL4	Localized	<10E-06	38.5	14.6	15.6	2.8	No	Yes	Yes	Class I-1
YPL173W	79	MRPL	MRPL40	Localized	<10E-06	36.3	2.9	8.7	0	Yes	Yes	Yes	Class I-1
YCR071C	79	MRPL	IMG2	Localized	<10E-06	32	2.7	12.4	0	No	Yes	Yes	Class I-1
YDR405W	79	MRPL	MRP20	Localized	<10E-06	31.3	12.3	14.4	4.52	Yes	Yes	Yes	Class I-1
YCR003W	79	MRPL	MRPL32	Localized	0.00561	29	2.2	1.1	0	No	Yes	NA	Class I-1
YBR122C	79	MRPL	MRPL36	Localized	<10E-06	28.6	1.1	5.8	0	Yes	No	Yes	Class I-1
YKL167C	79	MRPL	MRP49	Localized	<10E-06	28.4	0	4	0	No	Yes	Yes	Class I-1
YBR268W	79	MRPL	MRPL37	Localized	<10E-06	28	2.2	10.7	0	No	Yes	Yes	Class I-1
YGR076C	79	MRPL	MRPL25	Localized	0.000288	27.9	1	7.1	0	No	Yes	Yes	Class I-1
YJL063C	79	MRPL	MRPL8	Localized	<10E-06	27.8	4.4	11.2	2.3	Yes	Yes	Yes	Class I-1
YKL138C	79	MRPL	MRPL31	Localized	0.000416	27.6	1.3	10.8	0	No	Yes	Yes	Class I-1
YKR085C	79	MRPL	MRPL20	Localized	0.000358	22.1	2.1	0.4	0	No	Yes	Yes	Class I-1
YDR322W	79	MRPL	MRPL35	Localized	<10E-06	21.7	9.3	2.6	2.53	Yes	Yes	NA	Class I-1
YHR147C	79	MRPL	MRPL6	Localized	<10E-06	21.5	15	3.4	0.64	Yes	Yes	Yes	Class I-1
YMR286W	79	MRPL	MRPL33	Localized	<10E-06	21.4	0	6.9	0	Yes	Yes	NA	Class I-1
YDR115W	79	MRPL	YDR115W	Localized	0.0111	18.9	1	9.3	0	Yes	Yes	Yes	Class I-1
YCR046C	79	MRPL	IMG1	Localized	0.000293	18.4	3.4	11.9	0	Yes	Yes	Yes	Class I-1
YML009C	79	MRPL	MRPL39	Localized	0.000416	17.2	0	1.3	0	Yes	Yes	Yes	Class I-1
YDR462W	79	MRPL	MRPL28	Localized	0.000296	15.9	0	13.5	0	No	Yes	NA	Class I-1
YPR100W	79	MRPL	MRPL51	Localized	0.000298	15.4	5.9	1.9	0	No	Yes	NA	Class I-1
YNR022C	79	MRPL	MRPL50	Localized	0.00108	12.5	2.9	0	0	No	Yes	Yes	Class I-1
YNL185C	79	MRPL	MRPL19	Localized	0.0154	11.8	0.9	3.4	0	Yes	Yes	Yes	Class I-1
YMR225C	79	MRPL	MRPL44	undetermined	0.14	10.2	0.2	1.5	0	No	Yes	Yes	Class I-1
YMR024W	79	MRPL	MRPL3	Localized	<10E-06	100	22.6	10.3	100	Yes	Yes	NA	Class I-2
YMR193W	79	MRPL	MRPL24	Localized	<10E-06	100	11.7	4.8	86.66	Yes	Yes	Yes	Class I-2
YLR312W-A	79	MRPL	MRPL15	Localized	<10E-06	93	20.6	6.2	63.62	Yes	Yes	NA	Class I-2
YEL050C	79	MRPL	RML2	Localized	<10E-06	90.3	25.1	15.1	66.05	Yes	Yes	Yes	Class I-2
YNL177C	79	MRPL	MRPL22	Localized	<10E-06	86.5	27.2	13.3	89.61	Yes	Yes	Yes	Class I-2
YDR237W	79	MRPL	MRPL7	Localized	<10E-06	81.5	17.9	14.2	14.15	Yes	Yes	Yes	Class I-2
YNL252C	79	MRPL	MRPL17	Localized	<10E-06	74.5	19.1	4.2	51.76	No	Yes	Yes	Class I-2
YDL202W	79	MRPL	MRPL11	Localized	<10E-06	72.2	21.2	10.3	47.29	Yes	Yes	Yes	Class I-2
YNL284C	79	MRPL	MRPL10	Localized	<10E-06	71.1	17.8	0	44.38	Yes	Yes	Yes	Class I-2
YNL005C	79	MRPL	MRP7	Localized	<10E-06	65.6	21.5	22.7	58.14	Yes	Yes	Yes	Class I-2
YDR296W	79	MRPL	MHR1	Localized	<10E-06	62.5	19.4	13.1	27.69	No	Yes	Yes	Class I-2
YGL064C	79	MRPL	MRH4	Localized	<10E-06	60.3	28.9	8.2	70.13	Yes	Yes	NA	Class I-2
YDR116C	79	MRPL	MRPL1	Localized	<10E-06	60.3	18.2	0	38.73	Yes	Yes	Yes	Class I-2
YGR220C	79	MRPL	MRPL9	Localized	<10E-06	58.3	19.3	4.5	27.91	Yes	Yes	Yes	Class I-2
YBL038W	79	MRPL	MRPL16	Localized	<10E-06	54.1	13.1	6.5	23.55	Yes	Yes	NA	Class I-2
YKR006C	79	MRPL	MRPL13	Localized	<10E-06	52.8	13.3	10.4	14.09	No	Yes	Yes	Class I-2
YML025C	79	MRPL	YML6	Localized	<10E-06	52.7	20.2	1.9	25.58	Yes	Yes	Yes	Class I-2
YGL068W	79	MRPL	MNP1	Localized	<10E-06	52.3	12	7.9	16.04	Yes	Yes	Yes	Class I-2
YCL014W	79	MRPL	BUD3	Localized	0.0342	19.6	3.6	13	16.46	No	No	NA	Class II
YBR282W	79	MRPL	MRPL27	undetermined	0.283	2.9	0.4	0.3	0	No	Yes	Yes	Class III
YOR150W	79	MRPL	MRPL23	undetermined	NA	0.2	0	0	0	Yes	Yes	Yes	Class III
YLR189C	79	MRPL	ATG26	undetermined	0.26	0	2.9	9.2	4.13	Yes	No	NA	Class III
YPL183W-A	79	MRPL	YPL183W-A	undetermined	0.0613	0	0.3	0	0	Yes	Yes	NA	Class III
YPL097W	80	tRNAaminoacyl,	MSY1	Localized	<10E-06	94.2	24.5	0.5	85.82	Yes	Yes	Yes	Class I-2
YPR047W	80	tRNAaminoacyl,	MSF1	Localized	<10E-06	93.4	20.3	5.7	93.66	Yes	Yes	Yes	Class I-2
YPL104W	80	tRNAaminoacyl,	MSD1	Localized	<10E-06	51.4	32.3	11.1	47.11	Yes	Yes	Yes	Class I-2
YLR027C	80	tRNAaminoacyl,	AAT2	Not localized	0.00579	0	0.2	18	8.69	Yes	No	NA	Class III
YKL106W	80	tRNAaminoacyl,	AAT1	Not localized	0.000303	0	6.8	5	5.47	Yes	No	NA	Class III
YLR060W	80	tRNAaminoacyl,	FRS1	Not localized	0.000412	0	0	0	1.5	Yes	No	NA	Class III
YFL022C	80	tRNAaminoacyl,	FRS2	Not localized	<10E-06	0	0.7	0	0	Yes	No	NA	Class III
YMR038C	81	NA	CCS1	undetermined	0.169	0	0	7.1	6.76	Yes	Yes	NA	Class III
YJR104C	81	NA	SOD1	Not localized	0.0108	0	0	24.9	1.26	Yes	No	NA	Class III
YHR008C	81	NA	SOD2	Not localized	0.000158	0	10.6	0	0	Yes	No	NA	Class III
YMR302C	83	NA	PRP12	Localized	<10E-06	100	29.5	11.8	100	No	Yes	NA	Class I-2
YPR024W	83	NA	YME1	Localized	<10E-06	88.6	27.9	13	100	Yes	No	NA	Class II
YLR059C	83	NA	REX2	undetermined	0.14	0	5.6	0	1.85	Yes	No	NA	Class III
YDR478W	83	NA	SNM1	undetermined	NA	0	1.1	0	1.35	No	No	NA	Class III
YPL040C	84	NA	ISM1	Localized	<10E-06	66.3	29.2	5.4	86.14	Yes	Yes	Yes	Class I-2
YHR091C	84	NA	MSR1	Localized	<10E-06	36.3	17.3	0	26.04	Yes	Yes	Yes	Class I-2
YDR341C	84	NA	YDR341C	Not localized	0.000731	0	2.6	0.4	13.79	Yes	No	NA	Class III
YBR078W	85	NA	ECM33	Localized	<10E-06	54.6	27.4	11.7	90.32	Yes	No	NA	Class II
YLR106C	85	NA	MDN1	Localized	<10E-06	19.3	9.7	9.7	35.61	No	No	NA	Class II
YOR090C	86	NA	PTC5	Localized	<10E-06	75.4	12.6	7.3	76.87	No	No	NA	Class II
YKR064W	86	NA	YKR064W	undetermined	0.234	0	1.4	1	1.9	No	Yes	NA	Class III
YER078C	87	NA	YER078C	Localized	<10E-06	82.5	18.4	13.9	64.6	Yes	Yes	NA	Class I-2
YBR192W	87	NA	RIM2	Localized	<10E-06	67.8	8.6	0	42.95	No	No	Yes	Class I-2
YJL094C	88	NA	KHA1	Localized	<10E-06	65	19.9	32.4	81.76	Yes	No	NA	Class II
YLR193C	88	NA	YLR193C	undetermined	0.26	3.9	0	6.7	0	No	Yes	NA	Class III
YKL195W	89	NA	MIA40	Localized	<10E-06	100	30.7	19.8	100	Yes	Yes	NA	Class I-2
YFL027C	89	NA	GYP8	undetermined	0.298	1.4	1.5	0	5.57	No	No	NA	Class III
YGR101W	90	NA	PCP1	Localized	<10E-06	70.6	13.8	9	76.35	Yes	Yes	NA	Class I-2
YHL021C	90	NA	FMP12	Localized	<10E-06	37.5	16.3	36.3	27.93	Yes	No	NA	Class II
YOR285W	91	NA	YOR285W	Not localized	<10E-06	0	0.8	8	0	Yes	No	NA	Class III
YPR183W	91	NA	DPM1	Not localized	<10E-06	0	1.2	2.7	0	Yes	No	NA	Class III
YOR037W	93	NA	CYC2	Localized	0.00314	14.8	12.9	0.8	11.77	Yes	No	NA	Class II
YIL114C	93	NA	POR2	undetermined	0.228	5.3	10.4	0.9	15.68	No	No	NA	Class III
YNL055C	93	NA	POR1	Not localized	0.000671	0	0	0	16.72	No	No	NA	Class III
YML054C	95	NADmet,/TCAcycle	CYB2	Localized	<10E-06	100	12.1	2.7	100	Yes	No	NA	Class II
YDL174C	95	NADmet,/TCAcycle	DLD1	Localized	<10E-06	100	21.9	38.6	100	Yes	No	NA	Class II
YMR145C	95	NADmet,/TCAcycle	NDE1	Localized	<10E-06	86.7	36.9	12.6	100	Yes	No	NA	Class II
YOR356W	95	NADmet,/TCAcycle	YOR356W	Localized	<10E-06	74.7	40.8	0.8	100	Yes	No	NA	Class II
YDL085W	95	NADmet,/TCAcycle	NDE2	Localized	<10E-06	72.7	22.5	96.1	82.11	Yes	No	NA	Class II
YCR005C	95	NADmet,/TCAcycle	CIT2	Localized	<10E-06	55.5	0	67.3	21.21	Yes	No	NA	Class II
YML120C	95	NADmet,/TCAcycle	NDI1	Localized	<10E-06	48.8	43.4	0	61.03	Yes	No	NA	Class II
YPR001W	95	NADmet,/TCAcycle	CIT3	Localized	<10E-06	42	14.8	100	60.65	Yes	No	NA	Class II
YNR001C	95	NADmet,/TCAcycle	CIT1	Localized	<10E-06	33.6	34.3	17.9	66.99	Yes	No	NA	Class II
YPL262W	95	NADmet,/TCAcycle	FUM1	Localized	<10E-06	30.7	27.9	42.5	32.48	Yes	No	NA	Class II
YPR004C	95	NADmet,/TCAcycle	YPR004C	Localized	0.000156	25.8	28.1	0	26.35	Yes	No	NA	Class II
YKL085W	95	NADmet,/TCAcycle	MDH1	undetermined	0.278	0.1	36.7	0	9.78	Yes	No	NA	Class III
YGR207C	95	NADmet,/TCAcycle	YGR207C	undetermined	0.14	0	15.6	0	0	Yes	Yes	NA	Class III
YPL270W	96	NA	MDL2	Localized	<10E-06	100	33	11.5	99.18	Yes	No	NA	Class II
YMR301C	96	NA	ATM1	Localized	<10E-06	88.2	33.7	16.2	100	Yes	No	NA	Class II
YLR188W	96	NA	MDL1	Localized	<10E-06	59	24.6	2.8	71.99	Yes	No	NA	Class II
YHL038C	97	NA	CBP2	Localized	<10E-06	77.1	31	11.7	87.76	No	Yes	NA	Class I-2
YJL209W	97	NA	CBP1	Localized	0.00153	20.4	14.2	2.2	16.52	No	Yes	NA	Class I-2
YOR017W	97	NA	PET127	Localized	<10E-06	77.2	24.8	13	67.36	No	No	NA	Class II
YIL093C	99	MRPS	RSM25	Localized	<10E-06	48.5	12.2	9.7	4.66	No	Yes	Yes	Class I-1
YMR188C	99	MRPS	MRPS17	Localized	<10E-06	44	1.1	15.2	0	Yes	Yes	Yes	Class I-1
YMR158W	99	MRPS	MRPS8	Localized	<10E-06	40.2	0.7	8	2.87	Yes	Yes	Yes	Class I-1
YOR158W	99	MRPS	PET123	Localized	<10E-06	36.5	19.7	8.3	0	No	Yes	Yes	Class I-1
YBR251W	99	MRPS	MRPS5	Localized	<10E-06	35.6	11.7	0	3.97	Yes	Yes	Yes	Class I-1
YNR037C	99	MRPS	RSM19	Localized	<10E-06	24.1	1.6	21	0.48	Yes	Yes	Yes	Class I-1
YNL306W	99	MRPS	MRPS18	Localized	0.000159	23	6.8	5.3	0	Yes	Yes	Yes	Class I-1
YPR166C	99	MRPS	MRP2	Localized	0.0283	22.4	0.5	0.5	0	Yes	Yes	NA	Class I-1
YDR347W	99	MRPS	MRP1	undetermined	0.195	21.7	5.9	5.1	0	Yes	Yes	Yes	Class I-1
YBL090W	99	MRPS	MRP21	Localized	0.019	19.7	2.1	5.3	0	Yes	Yes	Yes	Class I-1
YDR041W	99	MRPS	RSM10	Localized	0.00447	19.1	4	8.1	0	Yes	Yes	Yes	Class I-1
YER050C	99	MRPS	RSM18	Localized	0.00339	19.1	0	10	0	Yes	Yes	NA	Class I-1
YNL081C	99	MRPS	SWS2	undetermined	0.169	12.4	0.2	0	0	Yes	Yes	Yes	Class I-1
YJR113C	99	MRPS	RSM7	Localized	0.00201	11	2.4	11.4	0	Yes	Yes	NA	Class I-1
YKL003C	99	MRPS	MRP17	Localized	0.0223	8.2	1.5	7.9	0	Yes	Yes	Yes	Class I-1
YGR165W	99	MRPS	MRPS35	Localized	<10E-06	95.6	18.8	11.9	93.27	No	Yes	Yes	Class I-2
YGR150C	99	MRPS	YGR150C	Localized	<10E-06	90.4	22.4	6.8	76.54	No	Yes	NA	Class I-2
YGR084C	99	MRPS	MRP13	Localized	<10E-06	85.1	36.6	12.9	79.95	No	Yes	Yes	Class I-2
YDR337W	99	MRPS	MRPS28	Localized	<10E-06	84.7	23.2	7.9	24	Yes	Yes	Yes	Class I-2
YBR146W	99	MRPS	MRPS9	Localized	<10E-06	62.4	26.3	7.4	26.64	Yes	No	Yes	Class I-2
YDR175C	99	MRPS	RSM24	Localized	<10E-06	61.7	14.5	13.8	17.03	No	Yes	Yes	Class I-2
YKL155C	99	MRPS	RSM22	Localized	<10E-06	54.5	24.9	0.3	50.32	Yes	No	Yes	Class I-2
YNL137C	99	MRPS	NAM9	Localized	<10E-06	52.7	30.1	8.6	35.59	Yes	Yes	Yes	Class I-2
YHL004W	99	MRPS	MRP4	Localized	<10E-06	52.4	25.7	5.3	27.22	Yes	Yes	Yes	Class I-2
YPL118W	99	MRPS	MRP51	Localized	<10E-06	51	27.7	12.7	12.18	No	Yes	NA	Class I-2
YJR101W	99	MRPS	RSM26	Localized	<10E-06	48.7	17.9	5.1	19.43	Yes	Yes	NA	Class I-2
YDR036C	99	MRPS	EHD3	Localized	<10E-06	29.3	19.9	18.5	13.97	Yes	Yes	Yes	Class I-2
YGL129C	99	MRPS	RSM23	Localized	0.000296	21.5	15.7	4.8	13.3	Yes	Yes	Yes	Class I-2
YOR205C	99	MRPS	FMP38	Localized	<10E-06	20	7.2	0	23.37	Yes	Yes	Yes	Class I-2
YGR215W	99	MRPS	RSM27	undetermined	0.288	7.9	2.6	4.5	0	No	Yes	NA	Class III
YNR036C	99	MRPS	YNR036C	undetermined	0.215	5.7	0	11	0	Yes	Yes	Yes	Class III
YPL013C	99	MRPS	MRPS16	undetermined	NA	4.8	2.4	2.2	0	Yes	Yes	Yes	Class III
YDL045W-A	99	MRPS	MRP10	undetermined	NA	3.5	0	0	0	No	Yes	NA	Class III
YOL115W	99	MRPS	TRF4	undetermined	0.26	1.8	1.4	0	1.99	No	No	NA	Class III
YHR059W	99	MRPS	FYV4	undetermined	NA	1.1	1.5	1.6	0	No	Yes	Yes	Class III
YFR049W	99	MRPS	YMR31	Not localized	<10E-06	0	2.5	0	0	No	No	NA	Class III
YHR075C	99	MRPS	PPE1	Not localized	0.00265	0	1.3	1.7	0	Yes	No	NA	Class III
YNL186W	99	MRPS	UBP10	Not localized	<10E-06	0	1.7	0	0	No	No	NA	Class III
YOR286W	100	NA	FMP31	Localized	0.000298	17.4	0	15	0	Yes	Yes	Yes	Class I-1
YLR204W	100	NA	QRI5	Localized	0.0124	13	0.4	5.8	0	No	Yes	NA	Class I-1
YER077C	101	NA	YER077C	Localized	<10E-06	49.3	14.6	0	71	No	Yes	NA	Class I-2
YLR289W	101	NA	GUF1	Localized	<10E-06	29.8	20.6	0.7	24.92	Yes	Yes	Yes	Class I-2
YKL162C	101	NA	YKL162C	undetermined	NA	0	4.2	1.2	0.96	Yes	No	NA	Class III
YHR002W	102	NA	LEU5	Localized	0.000159	16.9	2.4	0	16.51	No	Yes	NA	Class I-2
YOR108W	102	NA	LEU9	Localized	<10E-06	58.5	23.5	16.5	83.55	Yes	No	NA	Class II
YBL015W	103	Alcohol/aldehydedehy,	ACH1	Localized	<10E-06	99.7	28.7	43.2	96.17	Yes	No	NA	Class II
YOR374W	103	Alcohol/aldehydedehy,	ALD4	Localized	<10E-06	65.5	24.2	100	85.74	Yes	No	NA	Class II
YAL054C	103	Alcohol/aldehydedehy,	ACS1	undetermined	0.067	9.5	22.5	100	21.66	Yes	No	NA	Class II
YPL061W	103	Alcohol/aldehydedehy,	ALD6	undetermined	0.169	6.2	0	14.1	26.14	Yes	No	NA	Class III
YER073W	103	Alcohol/aldehydedehy,	ALD5	undetermined	0.303	4.8	12.1	15.7	30.75	Yes	No	NA	Class III
YLR153C	103	Alcohol/aldehydedehy,	ACS2	undetermined	0.234	0	1.3	0	23.04	Yes	No	NA	Class III
YGL256W	103	Alcohol/aldehydedehy,	ADH4	undetermined	0.0746	0	6.3	4.9	11.67	Yes	No	NA	Class III
YMR083W	103	Alcohol/aldehydedehy,	ADH3	Not localized	0.0175	0	16.6	7.8	7.7	Yes	No	NA	Class III
YDL168W	103	Alcohol/aldehydedehy,	SFA1	Not localized	0.0025	0	0.8	0	0	Yes	No	NA	Class III
YOL086C	103	Alcohol/aldehydedehy,	ADH1	Not localized	<10E-06	0	0	0	0	Yes	No	NA	Class III
YKL217W	104	NA	JEN1	Localized	<10E-06	100	15.6	100	100	Yes	No	NA	Class II
YJR095W	104	NA	SFC1	undetermined	0.169	0	9.6	92.1	0	No	No	NA	Class III
YHR120W	105	Mismatchrepair	MSH1	Localized	<10E-06	34.3	14.4	3.9	47.08	Yes	Yes	NA	Class I-2
YOR201C	108	NA	MRM1	Localized	<10E-06	30	11.4	2.3	43.07	Yes	No	Yes	Class I-2
YKL192C	108	NA	ACP1	undetermined	0.215	2.5	0.1	8.8	0	Yes	Yes	NA	Class III
YPR033C	108	NA	HTS1	Not localized	0.00561	0	2.8	0	5.4	Yes	No	NA	Class III
YBR034C	108	NA	HMT1	Not localized	<10E-06	0	0	0	0	Yes	No	NA	Class III
YPR002W	109	NA	PDH1	Localized	<10E-06	100	7.3	100	100	Yes	No	NA	Class II
YIL136W	109	NA	OM45	Localized	<10E-06	40.1	26	16.7	46.07	Yes	No	NA	Class II
YPR006C	109	NA	ICL2	Localized	<10E-06	26.3	8.1	71.4	27.24	Yes	No	NA	Class II
YPL168W	110	NA	YPL168W	Localized	<10E-06	31.2	10.8	0	15.71	No	Yes	NA	Class I-2
YOR022C	110	NA	YOR022C	Localized	<10E-06	28.2	18.3	1.8	30.88	Yes	No	NA	Class II
YHR106W	111	NA	TRR2	Localized	<10E-06	17.7	5.7	11.6	16.35	Yes	No	NA	Class II
YPL091W	111	NA	GLR1	Localized	0.0198	9.8	7.7	7.5	17.27	Yes	No	NA	Class II
YCR083W	111	NA	TRX3	Not localized	<10E-06	0	0	0	0	Yes	Yes	NA	Class III
YML061C	112	NA	PIF1	Localized	<10E-06	33.4	9.4	2.6	32.65	Yes	No	NA	Class II
YHR031C	112	NA	RRM3	undetermined	0.303	1	3.3	13.7	6.13	Yes	No	NA	Class III
YGR286C	113	NA	BIO2	Localized	<10E-06	54.9	19.4	11.2	65.06	Yes	No	NA	Class II
YNL003C	113	NA	PET8	Not localized	0.0243	0	4.6	0	10.43	No	No	NA	Class III
YLR368W	114	NA	MDM30	undetermined	0.109	0	0.1	0	0	No	No	NA	Class III
YPR011C	115	Transport	YPR011C	Localized	<10E-06	24.6	7.5	10	29.94	No	Yes	NA	Class I-2
YFR045W	115	Transport	YFR045W	Localized	<10E-06	23.7	4	0	24.26	No	Yes	NA	Class I-2
YOR100C	115	Transport	CRC1	Localized	0.00322	9.8	6.2	100	11.96	No	No	NA	Class II
YNL083W	115	Transport	SAL1	Localized	0.0198	7.3	2.1	9.4	7.1	No	Yes	Yes	Class III
YPR021C	115	Transport	AGC1	undetermined	NA	0.8	0.9	0	0	No	Yes	NA	Class III
YDR332W	116	NA	YDR332W	undetermined	0.147	6.4	7.5	0	15.92	Yes	No	NA	Class III
YOL095C	116	NA	HMI1	Not localized	0.0124	0	1.2	0	0	Yes	No	NA	Class III
YGL136C	118	NA	MRM2	Localized	<10E-06	31.7	7.4	5.8	31.81	Yes	Yes	NA	Class I-2
YHR168W	118	NA	MTG2	Localized	<10E-06	27.2	14.5	1.5	41.3	Yes	Yes	Yes	Class I-2
YPL224C	119	NA	MMT2	Localized	<10E-06	52.6	17.8	14.9	63.49	Yes	Yes	NA	Class I-2
YMR177W	119	NA	MMT1	Localized	<10E-06	89.2	19.6	16.6	75.29	Yes	No	NA	Class II
YDL130W-A	120	NA	STF1	Not localized	<10E-06	0	0.4	4.4	0	No	No	NA	Class III
YGR008C	120	NA	STF2	Not localized	0.00201	0	0	17.4	0	No	No	NA	Class III
YHR076W	121	NA	PTC7	Localized	<10E-06	80.4	25.9	13	96.25	Yes	Yes	NA	Class I-2
YDL222C	121	NA	FMP45	Localized	<10E-06	59.8	25.4	68.4	85.18	No	No	NA	Class II
YIR024C	122	NA	YIR024C	Localized	<10E-06	75.8	13.7	9.9	54.99	No	Yes	Yes	Class I-2
YKL011C	122	NA	CCE1	Localized	<10E-06	24.5	10.5	2.4	24.26	No	No	NA	Class II
YML042W	123	NA	CAT2	Localized	<10E-06	52.8	20.6	46.2	74.64	Yes	No	NA	Class II
YER024W	123	NA	YAT2	Localized	0.000158	26.8	0.1	92.7	16.82	Yes	No	NA	Class II
YAR035W	123	NA	YAT1	Localized	0.00223	11.5	2.1	100	21.26	Yes	No	NA	Class II
YDR384C	124	NA	ATO3	Localized	<10E-06	49.5	44.1	100	66.05	Yes	No	NA	Class II
YNR002C	124	NA	FUN34	Localized	<10E-06	32.3	6.5	82.2	42.29	Yes	No	NA	Class II
YGL107C	126	NA	RMD9	Localized	<10E-06	85	30.9	15.3	81.49	No	Yes	Yes	Class I-2
YGL104C	126	NA	VPS73	Localized	<10E-06	42.8	23.3	6.4	56.87	Yes	No	NA	Class II
YKL055C	127	NA	OAR1	Localized	0.0342	7.8	15.7	7.3	19.35	Yes	No	NA	Class III
YOR221C	127	NA	MCT1	Not localized	0.0385	0	9.5	1.8	3.53	Yes	No	NA	Class III
YLL060C	128	NA	GTT2	Not localized	<10E-06	0	3.2	14.8	13.97	Yes	No	NA	Class III
YDR513W	128	NA	TTR1	Not localized	0.0039	0	2.3	1.2	0	Yes	No	NA	Class III
YIR038C	128	NA	GTT1	Not localized	<10E-06	0	0.9	6.4	0	Yes	No	NA	Class III
YDR268W	129	NA	MSW1	Localized	<10E-06	87.2	18.4	14.4	100	Yes	Yes	NA	Class I-2
YJL121C	129	NA	RPE1	Not localized	<10E-06	0	0	0	0	Yes	Yes	NA	Class III
YBL057C	130	NA	PTH2	Localized	<10E-06	25.4	7.1	2.1	13.62	Yes	No	NA	Class II
YHR189W	130	NA	PTH1	Localized	0.0141	8.3	3	8.9	6.7	Yes	No	NA	Class II
YHR024C	131	NA	MAS2	Localized	<10E-06	30	24.1	13.6	13.08	Yes	No	Yes	Class I-2
YLR163C	131	NA	MAS1	Localized	<10E-06	83.9	17.7	20.3	50.88	Yes	No	NA	Class II
YOL021C	131	NA	DIS3	undetermined	NA	1.5	2.6	0	13.32	Yes	No	NA	Class III
YNL066W	133	NA	SUN4	Localized	<10E-06	44.6	8.1	48.4	56.81	No	No	NA	Class II
YKR042W	133	NA	UTH1	Localized	<10E-06	31.6	11.3	27.2	47.48	No	No	NA	Class II
YBL030C	134	NA	PET9	Localized	<10E-06	76.9	18.8	15.6	79.38	No	No	NA	Class II
YBR085W	134	NA	AAC3	undetermined	0.127	7.2	8	10.2	13.94	No	No	NA	Class III
YMR056C	134	NA	AAC1	Localized	0.0243	6.2	9.3	0	30.52	No	No	NA	Class III
YDR336W	135	NA	YDR336W	Localized	0.00811	9.7	3.3	3.5	11.48	Yes	No	NA	Class II
YDR305C	135	NA	HNT2	Not localized	0.00579	0	3.1	0	0	Yes	No	NA	Class III
YKL114C	136	NA	APN1	undetermined	0.221	5	10.7	0	1.25	Yes	No	NA	Class III
YOL043C	136	NA	NTG2	undetermined	NA	0.5	3.5	4.1	6.4	Yes	No	NA	Class III
YAL015C	136	NA	NTG1	undetermined	0.208	0.1	3.2	10	0	Yes	Yes	NA	Class III
YML060W	136	NA	OGG1	Not localized	<10E-06	0	0.7	0	0	Yes	No	NA	Class III
YLR218C	137	NA	YLR218C	Localized	<10E-06	38.7	4.3	25.1	7.98	No	Yes	Yes	Class I-2
YEL059C-A	137	NA	SOM1	Not localized	<10E-06	0	0	0	0	No	No	NA	Class III
YLR239C	138	NA	LIP2	Localized	<10E-06	74.4	17.1	13.7	40.37	Yes	No	NA	Class II
YOR196C	138	NA	LIP5	Localized	<10E-06	43.9	27.7	0.3	78.81	Yes	No	NA	Class II
YOL098C	139	NA	YOL098C	Not localized	0.0342	0	4.1	0	12.95	Yes	No	NA	Class III
YDR361C	139	NA	BCP1	undetermined	0.103	0	0.4	6.7	1.07	No	No	NA	Class III
YPL208W	139	NA	YPL208W	Not localized	<10E-06	0	0.5	0	0	No	No	NA	Class III
YCR099C	141	NA	YCR099C	Localized	<10E-06	56.5	9.2	0	68.58	No	No	NA	Class II
YBL059W	141	NA	YBL059W	undetermined	0.0549	0	1.4	0	0	No	No	NA	Class III
YGR049W	142	NA	SCM4	Localized	<10E-06	61.1	15.3	0	79.31	No	No	NA	Class II
YDL059C	142	NA	RAD59	undetermined	0.161	5.6	3.6	4.7	4.2	Yes	No	NA	Class III
YKR065C	143	NA	FMP18	Localized	0.00113	19.5	9	0	9.68	No	Yes	NA	Class I-2
YLR036C	143	NA	YLR036C	Localized	<10E-06	37.3	8.1	0	18.22	No	No	NA	Class II
YKL087C	144	NA	CYT2	Localized	0.0175	9.4	1.8	2.1	0	No	Yes	Yes	Class I-1
YLR285W	144	NA	NNT1	Not localized	0.0051	0	0.9	4.1	0	Yes	No	NA	Class III
YKL132C	145	NA	RMA1	undetermined	0.176	6.8	2.3	5.2	9.29	Yes	No	NA	Class III
YOR241W	145	NA	MET7	undetermined	0.0746	0	4.3	0	10.31	Yes	No	NA	Class III
YGR171C	146	NA	MSM1	Localized	<10E-06	63.4	19.3	5.1	64.11	Yes	Yes	Yes	Class I-2
YBL013W	146	NA	FMT1	Localized	<10E-06	60.9	27.6	16.8	58.11	Yes	No	NA	Class II
YGR264C	146	NA	MES1	undetermined	0.215	0	1.1	0	18.1	Yes	No	NA	Class III
YKL148C	147	RCC-II	SDH1	Localized	<10E-06	60.4	34.3	7.3	62.75	Yes	Yes	NA	Class I-2
YOR142W	147	RCC-II	LSC1	Localized	<10E-06	47.6	23.7	42	25.27	Yes	Yes	NA	Class I-2
YKL141W	147	RCC-II	SDH3	Localized	<10E-06	34.8	12.5	14	45.26	Yes	No	NA	Class II
YLL041C	147	RCC-II	SDH2	Localized	0.000358	19	39.6	0	15.5	Yes	No	NA	Class II
YGR244C	147	RCC-II	LSC2	undetermined	0.109	10.2	43	12.3	19.98	Yes	No	NA	Class II
YJL045W	147	RCC-II	YJL045W	Not localized	0.000957	0	20.2	2.8	1.77	Yes	No	NA	Class III
YDR178W	147	RCC-II	SDH4	Not localized	0.00157	0	5.2	1.7	0	Yes	No	NA	Class III
YLR164W	147	RCC-II	YLR164W	Not localized	0.00811	0	0.1	7.3	0	No	No	NA	Class III
YMR118C	147	RCC-II	YMR118C	Not localized	<10E-06	0	4.8	0	0	Yes	No	NA	Class III
YIL043C	148	NA	CBR1	Localized	0.00153	11.7	21.1	0	30.75	Yes	No	NA	Class II
YKL150W	148	NA	MCR1	undetermined	0.283	3.4	16.1	0	50.24	Yes	No	NA	Class III
YDL066W	149	Isocitratemet,	IDP1	Localized	<10E-06	68	49.9	10.4	93.36	Yes	No	NA	Class II
YLR304C	149	Isocitratemet,	ACO1	Localized	<10E-06	56.9	61.3	6.6	91.74	Yes	No	NA	Class II
YJL200C	149	Isocitratemet,	YJL200C	Localized	<10E-06	25.7	14.9	4.9	51.64	Yes	No	NA	Class II
YOR136W	149	Isocitratemet,	IDH2	Localized	0.00322	17.2	15.8	13.8	18.05	Yes	No	NA	Class II
YNL037C	149	Isocitratemet,	IDH1	Localized	0.000156	16	31.3	11.9	25.85	Yes	No	NA	Class II
YNL009W	149	Isocitratemet,	IDP3	Localized	0.00153	11.8	6.4	63	12.46	Yes	No	NA	Class II
YLR216C	150	NA	CPR6	Not localized	0.000476	0	0	0	10.9	Yes	No	NA	Class III
YMR186W	150	NA	HSC82	Not localized	<10E-06	0	0	0	5.49	Yes	No	NA	Class III
YMR035W	152	NA	IMP2	undetermined	0.266	6.5	0.6	14.2	10.29	Yes	No	NA	Class III
YMR150C	152	NA	IMP1	undetermined	0.0953	0	9.4	0	0	Yes	No	NA	Class III
YDL178W	153	NA	DLD2	Localized	<10E-06	68.1	41.3	2	100	Yes	Yes	NA	Class I-2
YDR129C	153	NA	SAC6	Localized	0.000476	19.9	1.5	17.1	34.53	No	No	NA	Class II
YHR179W	153	NA	OYE2	Not localized	0.00444	0	1.8	7.9	21.8	Yes	No	NA	Class III
YJR122W	154	NA	CAF17	Localized	<10E-06	94.4	15.2	26.4	55.08	Yes	Yes	Yes	Class I-2
YKR036C	154	NA	CAF4	Localized	0.000158	18	8.4	2.9	23.98	Yes	No	NA	Class II
Q0080	155	RCC-V	ATP8	Localized	<10E-06	100	100	100	100	Yes	No	NA	Class IV
Q0130	155	RCC-V	OLI1	Localized	<10E-06	100	100	100	100	Yes	No	NA	Class IV
Q0085	155	RCC-V	ATP6	undetermined	0.283	0	2.1	1.5	0	Yes	No	NA	Class IV
YBL099W	155	RCC-V	ATP1	Localized	0.00223	9	40.2	2.9	22.91	Yes	Yes	NA	Class I-2
YBR039W	155	RCC-V	ATP3	Localized	<10E-06	87.9	48.3	4.2	77.73	Yes	No	NA	Class II
YJR121W	155	RCC-V	ATP2	Localized	<10E-06	44.7	67.1	0.5	79.31	Yes	No	NA	Class II
YPL078C	155	RCC-V	ATP4	Localized	0.01	13.5	32.3	0	24.17	No	No	NA	Class II
YDL004W	155	RCC-V	ATP16	Not localized	<10E-06	0	0.7	1.1	0	Yes	No	NA	Class III
YDL181W	155	RCC-V	INH1	Not localized	0.000296	0	0	0	0	No	No	NA	Class III
YDR298C	155	RCC-V	ATP5	Not localized	<10E-06	0	11.8	2.3	0	Yes	No	NA	Class III
YDR322C-A	155	RCC-V	TIM11	undetermined	0.183	0	0.8	3.3	0	No	Yes	NA	Class III
YDR377W	155	RCC-V	ATP17	Not localized	<10E-06	0	0	0	0	No	No	NA	Class III
YKL016C	155	RCC-V	ATP7	Not localized	0.000298	0	0	4.5	0	No	No	NA	Class III
YLR295C	155	RCC-V	ATP14	Not localized	0.0039	0	0	3.3	0	No	No	NA	Class III
YML081C-A	155	RCC-V	ATP18	Not localized	<10E-06	0	0.5	0	0	No	Yes	NA	Class III
YOL077W-A	155	RCC-V	ATP19	Not localized	<10E-06	0	0	0	0	No	Yes	NA	Class III
YPL271W	155	RCC-V	ATP15	Not localized	<10E-06	0	0	8.2	0	No	No	NA	Class III
YPR020W	155	RCC-V	ATP20	Not localized	<10E-06	0	0	0	0	No	No	NA	Class III
Q0105	156	RCC-III	COB	Localized	<10E-06	100	100	100	100	Yes	No	NA	Class IV
YOR065W	156	RCC-III	CYT1	Localized	<10E-06	81.8	29.2	3.1	73.23	Yes	No	NA	Class II
YBL045C	156	RCC-III	COR1	undetermined	0.195	12.6	31.5	4.1	7.52	Yes	No	NA	Class II
YEL024W	156	RCC-III	RIP1	Not localized	0.0505	0	16.6	0	1.77	Yes	No	NA	Class III
YPR191W	156	RCC-III	QCR2	Not localized	0.00746	0	16.5	0	1.69	Yes	No	NA	Class III
YDR529C	156	RCC-III	QCR7	Not localized	0.0243	0	0	2.7	0	No	No	NA	Class III
YFR033C	156	RCC-III	QCR6	undetermined	NA	0	0.8	4.4	0	No	No	NA	Class III
YGR183C	156	RCC-III	QCR9	Not localized	0.000158	0	0	2.1	0	No	No	NA	Class III
YHR001W-A	156	RCC-III	QCR10	Not localized	<10E-06	0	0	0	0	No	No	NA	Class III
YJL166W	156	RCC-III	QCR8	Not localized	0.00149	0	0	1.2	0	No	No	NA	Class III
YFL036W	157	NA	RPO41	Localized	<10E-06	52.7	27.7	14.8	42.02	Yes	Yes	NA	Class I-2
YMR228W	157	NA	MTF1	Localized	<10E-06	83.3	24.9	9.1	100	Yes	No	NA	Class II
YGL008C	158	NA	PMA1	Localized	<10E-06	80.4	25.2	24.8	100	Yes	No	NA	Class II
YPL036W	158	NA	PMA2	Localized	<10E-06	28.3	32.6	28.3	41.77	Yes	No	NA	Class II
YEL017C-A	158	NA	PMP2	Localized	0.0385	9	24.3	10.8	53.42	No	No	NA	Class II
YER032W	159	NA	FIR1	undetermined	0.116	12.6	3	13.8	9.6	Yes	No	NA	Class II
YDR195W	159	NA	REF2	Not localized	0.0283	0	0	3.7	1.11	No	No	NA	Class III
YDR343C	160	NA	HXT6	Localized	<10E-06	92.8	31.1	100	100	Yes	No	NA	Class II
YDR342C	160	NA	HXT7	Localized	<10E-06	88.7	24.1	100	100	Yes	No	NA	Class II
YDR079W	161	RCCasm5	PET100	Localized	0.0147	15.4	0.7	2.3	0	No	Yes	Yes	Class I-1
YHR116W	161	RCCasm5	COX23	Localized	<10E-06	37.7	4.3	27.8	1.76	No	Yes	Yes	Class I-1
YDR231C	161	RCCasm5	COX20	Localized	0.00174	17.8	2.6	2.7	11.41	No	Yes	NA	Class I-2
YML129C	161	RCCasm5	COX14	Localized	0.000155	22.6	0	14.6	0	No	Yes	NA	Class I-1
YGR112W	161	RCCasm5	SHY1	Localized	<10E-06	77.1	28.6	12	84.86	Yes	Yes	Yes	Class I-2
YDL107W	161	RCCasm5	MSS2	Localized	0.000412	22.5	4.8	8.5	1.15	Yes	Yes	Yes	Class I-1
YGR062C	161	RCCasm5	COX18	Localized	<10E-06	45.5	10.3	0	52.55	Yes	Yes	Yes	Class I-2
YOR266W	161	RCCasm5	PNT1	Localized	<10E-06	33.6	15.4	0	31.24	No	Yes	NA	Class I-2
YER058W	161	RCCasm5	PET117	Localized	<10E-06	43.1	2.8	9.9	0	No	Yes	Yes	Class I-1
YJR034W	161	RCCasm5	PET191	Localized	0.00339	19.1	0	3.8	0	No	Yes	Yes	Class I-1
Q0140	s	NA	VAR1	Localized	<10E-06	100	100	100	100	Yes	No	NA	Class IV
YDR494W	s	NA	RSM28	Localized	0.000166	31.2	16.1	9.5	4.12	No	Yes	NA	Class I-1
YIL157C	s	NA	COA1	Localized	0.000288	26.7	14.5	10.1	0	No	Yes	NA	Class I-1
YML050W	s	NA	YML050W	Localized	0.000293	18	3.3	6.6	3	Yes	Yes	NA	Class I-1
YHR038W	s	NA	RRF1	Localized	0.000303	16.9	12.2	0	0	Yes	Yes	Yes	Class I-1
YNR040W	s	NA	YNR040W	Localized	0.00153	14.3	7.8	3.4	1.96	No	Yes	Yes	Class I-1
YLR168C	s	NA	YLR168C	undetermined	0.264	10.2	1.5	4.5	3.5	No	Yes	NA	Class I-1
YGR169C	s	NA	PUS6	undetermined	0.247	10.1	8.1	3.6	6.02	Yes	Yes	NA	Class I-1
YDR061W	s	NA	YDR061W	Localized	<10E-06	100	25.2	5.9	100	Yes	Yes	NA	Class I-2
YMR115W	s	NA	FMP24	Localized	<10E-06	79.9	24.2	5.6	82.81	Yes	Yes	NA	Class I-2
YLL048C	s	NA	YBT1	Localized	<10E-06	76.9	34.8	14.6	100	Yes	Yes	NA	Class I-2
YMR157C	s	NA	FMP39	Localized	<10E-06	75.7	14.9	16.5	70.27	Yes	Yes	Yes	Class I-2
YPL005W	s	NA	AEP3	Localized	<10E-06	72.6	15.2	7.8	64.76	No	Yes	NA	Class I-2
YDR393W	s	NA	SHE9	Localized	<10E-06	69.9	12.1	8.7	41.25	Yes	Yes	NA	Class I-2
YJL131C	s	NA	YJL131C	Localized	<10E-06	67.8	24.3	5.4	59.62	No	Yes	NA	Class I-2
YER087W	s	NA	YER087W	Localized	<10E-06	63.2	30.3	2.5	52.33	Yes	Yes	NA	Class I-2
YJR080C	s	NA	FMP26	Localized	<10E-06	61.2	46.6	4.4	63.26	Yes	Yes	NA	Class I-2
YCR024C	s	NA	SLM5	Localized	<10E-06	59.8	19.7	5.6	34.62	Yes	Yes	Yes	Class I-2
YLR077W	s	NA	FMP25	Localized	<10E-06	57.7	23.8	12.8	67.16	Yes	Yes	NA	Class I-2
YPR125W	s	NA	YPR125W	Localized	<10E-06	56.6	24.6	6.2	100	No	Yes	NA	Class I-2
YER182W	s	NA	FMP10	Localized	<10E-06	39.7	25.1	6.2	51.7	Yes	Yes	NA	Class I-2
YPL103C	s	NA	FMP30	Localized	<10E-06	38.7	17.8	6.9	43.56	Yes	Yes	Yes	Class I-2
YMR293C	s	NA	YMR293C	Localized	<10E-06	38	15.3	3.3	38.44	Yes	Yes	Yes	Class I-2
YOR354C	s	NA	MSC6	Localized	0.0108	35.1	18.7	4.4	8.15	No	Yes	NA	Class I-2
YIL006W	s	NA	YIL006W	Localized	0.000302	19.2	8.1	0.3	11.56	No	Yes	Yes	Class I-2
YLR142W	s	NA	PUT1	Localized	<10E-06	100	8.8	66.6	100	Yes	No	NA	Class II
YKL134C	s	NA	01-oct,	Localized	<10E-06	100	40.2	10.3	100	Yes	No	NA	Class II
YPL188W	s	NA	POS5	Localized	<10E-06	87.3	28.5	1.5	97.93	Yes	No	NA	Class II
YOR330C	s	NA	MIP1	Localized	<10E-06	84.5	25.3	9.6	88.13	Yes	No	NA	Class II
YER080W	s	NA	FMP29	Localized	<10E-06	82.6	56.8	4.3	99.22	Yes	No	NA	Class II
YBR014C	s	NA	YBR014C	Localized	<10E-06	80.6	24.9	0	87.03	Yes	No	NA	Class II
YJL171C	s	NA	YJL171C	Localized	<10E-06	77.9	31	8.8	100	Yes	No	NA	Class II
YHR067W	s	NA	HTD2	Localized	<10E-06	75.2	18.5	0	66.95	Yes	No	NA	Class II
YML086C	s	NA	ALO1	Localized	<10E-06	69.5	21.3	4	72.2	Yes	No	NA	Class II
YHR198C	s	NA	FMP22	Localized	<10E-06	69.2	4.6	14.3	55.85	Yes	No	NA	Class II
YDR456W	s	NA	NHX1	Localized	<10E-06	69	37.5	10.2	94.56	Yes	No	NA	Class II
YOL048C	s	NA	YOL048C	Localized	<10E-06	68.3	16.8	30.2	45.08	Yes	No	NA	Class II
YLR454W	s	NA	FMP27	Localized	<10E-06	67.9	33	15.5	73.59	No	No	NA	Class II
YCL044C	s	NA	YCL044C	Localized	<10E-06	67.9	31	7.7	70.93	No	No	NA	Class II
YGR031W	s	NA	YGR031W	Localized	<10E-06	66.6	20	15.1	64.57	Yes	No	NA	Class II
YPR155C	s	NA	NCA2	Localized	<10E-06	66	16.5	4.5	83.55	No	No	NA	Class II
YEL052W	s	NA	AFG1	Localized	<10E-06	60.7	26.4	8	86.83	Yes	No	NA	Class II
YPL060W	s	NA	LPE10	Localized	<10E-06	59.9	19.2	0.9	53.79	Yes	No	NA	Class II
YDR518W	s	NA	EUG1	Localized	<10E-06	58.8	30.8	9.7	80.68	No	No	NA	Class II
YMR252C	s	NA	YMR252C	Localized	<10E-06	55.4	12.9	11.3	52.75	No	No	NA	Class II
YOL008W	s	NA	YOL008W	Localized	<10E-06	51.1	16.3	0.6	49.25	Yes	No	NA	Class II
YPL222W	s	NA	FMP40	Localized	<10E-06	49.1	24.5	22	64.4	Yes	No	NA	Class II
YER053C	s	NA	PIC2	Localized	<10E-06	48.1	11.8	1	55.41	No	No	NA	Class II
YKL027W	s	NA	YKL027W	Localized	<10E-06	43.9	14.4	0	70.41	Yes	No	NA	Class II
YMR097C	s	NA	MTG1	Localized	<10E-06	40.5	21.2	0	50.21	Yes	No	NA	Class II
YKR070W	s	NA	YKR070W	Localized	<10E-06	35.8	21.9	0	49.36	Yes	No	NA	Class II
YPR116W	s	NA	YPR116W	Localized	<10E-06	33.6	14	10.4	34.46	No	No	NA	Class II
YDR120C	s	NA	TRM1	Localized	<10E-06	26.6	5.7	9.8	16.33	Yes	No	NA	Class II
YHR199C	s	NA	FMP34	Localized	<10E-06	26.5	14.1	15.6	49.44	Yes	No	NA	Class II
YLR348C	s	NA	DIC1	Localized	<10E-06	25	5.7	28.7	17.77	No	No	NA	Class II
YHR003C	s	NA	YHR003C	Localized	<10E-06	23.9	16.8	4.8	41.52	Yes	No	NA	Class II
YIL149C	s	NA	MLP2	Localized	0.000162	23.4	13.3	2.8	43.05	Yes	No	NA	Class II
YOR114W	s	NA	YOR114W	Localized	<10E-06	23.2	3.7	0	22.38	No	No	NA	Class II
YAL008W	s	NA	FUN14	Localized	0.000155	22.7	14.2	0	14.41	No	No	NA	Class II
YLR426W	s	NA	YLR426W	Localized	<10E-06	22.3	10.9	2.2	25.94	Yes	No	NA	Class II
YNL125C	s	NA	ESBP6	Localized	<10E-06	21.2	6.5	4.3	28.91	Yes	No	NA	Class II
YJL023C	s	NA	PET130	Localized	0.000159	20.2	5.8	8.9	17.62	No	No	NA	Class II
YNL213C	s	NA	YNL213C	Localized	0.000165	19.4	6.1	4	7.14	Yes	No	NA	Class II
YOR350C	s	NA	MNE1	Localized	<10E-06	18.2	19	0	39.28	No	No	NA	Class II
YGL080W	s	NA	FMP37	Localized	0.0164	15.6	4.4	49	13.41	No	No	NA	Class II
YNL328C	s	NA	MDJ2	Localized	0.000778	14.9	3.1	0	4.33	Yes	No	NA	Class II
YJR111C	s	NA	YJR111C	Localized	0.00158	13.9	12.5	10.6	41.22	Yes	No	NA	Class II
YBR047W	s	NA	FMP23	Localized	0.00339	12.2	0.8	13.2	13.67	No	No	NA	Class II
YDR236C	s	NA	FMN1	Localized	0.00746	11	7.2	0	15.17	Yes	No	NA	Class II
YMR165C	s	NA	SMP2	Localized	0.0025	10.5	1.6	6	16.91	Yes	No	NA	Class II
YGR243W	s	NA	FMP43	Localized	0.0111	9.1	0	11.9	12.22	No	No	NA	Class II
YHR162W	s	NA	YHR162W	undetermined	0.109	8.6	0	69	18.16	No	No	NA	Class II
YJL147C	s	NA	YJL147C	undetermined	0.0549	8.5	14.5	0.1	7.39	No	No	NA	Class II
YOL042W	s	NA	NGL1	undetermined	0.14	8.3	15.8	0	12.55	Yes	No	NA	Class II
YCL057W	s	NA	PRD1	undetermined	0.14	8	11.5	2.3	18.25	Yes	No	NA	Class II
YBR104W	s	NA	YMC2	undetermined	0.103	7.7	3.5	0.8	13.47	No	No	NA	Class III
YGL057C	s	NA	YGL057C	Localized	0.019	7.5	21.8	0	7.23	No	No	NA	Class III
YPL099C	s	NA	FMP14	undetermined	0.247	6.6	4.4	12.1	1.13	No	Yes	NA	Class III
YNR016C	s	NA	ACC1	undetermined	0.283	6.1	1.6	1.5	27.85	Yes	No	NA	Class III
YJL046W	s	NA	YJL046W	Localized	0.012	5.6	4.1	0	6.67	Yes	Yes	Yes	Class III
YGL023C	s	NA	PIB2	undetermined	0.189	5.2	3	2.9	7.75	Yes	No	NA	Class III
YPL174C	s	NA	NIP100	undetermined	0.241	4.8	4.7	2	7.47	Yes	No	NA	Class III
YFR011C	s	NA	YFR011C	undetermined	0.247	4.2	1.6	7.3	0	No	Yes	NA	Class III
YKL208W	s	NA	CBT1	undetermined	NA	3.7	5.5	3.8	1.07	No	Yes	NA	Class III
YGL085W	s	NA	YGL085W	undetermined	NA	2.6	6.5	4.6	10.63	Yes	No	NA	Class III
YGR096W	s	NA	TPC1	undetermined	0.298	2.6	4.1	2.5	7.52	No	No	NA	Class III
YPL159C	s	NA	PET20	undetermined	NA	1.8	17.4	0	2.08	No	No	NA	Class III
YDR065W	s	NA	YDR065W	undetermined	0.228	0.6	9	0	12.77	No	Yes	NA	Class III
YMR110C	s	NA	YMR110C	undetermined	0.201	0.5	2.3	0	11.15	Yes	No	NA	Class III
YJR062C	s	NA	NTA1	undetermined	0.169	0.3	4.5	3.8	0.83	Yes	No	NA	Class III
YMR278W	s	NA	YMR278W	undetermined	0.247	0.1	1.9	0	8.95	Yes	No	NA	Class III
YJR003C	s	NA	YJR003C	undetermined	0.293	0.1	8.9	0	5.88	No	No	NA	Class III
YIL047C	s	NA	SYG1	undetermined	NA	0	13.9	0	33.68	No	No	NA	Class III
YOR271C	s	NA	YOR271C	Not localized	0.0051	0	5.3	0	9.81	No	No	NA	Class III
YPR058W	s	NA	YMC1	Not localized	0.00746	0	1.8	19.1	9.71	No	No	NA	Class III
YER096W	s	NA	SHC1	undetermined	0.154	0	0.9	35.3	7.31	Yes	No	NA	Class III
YBL098W	s	NA	BNA4	Not localized	0.00339	0	0.5	3	6.76	Yes	No	NA	Class III
YOR274W	s	NA	MOD5	undetermined	0.228	0	4.9	0	6.45	Yes	Yes	NA	Class III
YPL009C	s	NA	YPL009C	undetermined	0.0953	0	3.4	0	6.1	Yes	No	NA	Class III
YOL025W	s	NA	LAG2	Not localized	0.0147	0	1	0.4	5.87	No	No	NA	Class III
YAL011W	s	NA	SWC3	Not localized	0.0198	0	3.7	0	4.91	Yes	No	NA	Class III
YGL240W	s	NA	DOC1	undetermined	0.0816	0	4	0	4.19	Yes	No	NA	Class III
YLR132C	s	NA	YLR132C	undetermined	0.0613	0	3.9	0	4.16	No	No	NA	Class III
YML007C-A	s	NA	YML007C-A	undetermined	NA	0	1.6	9.6	4	No	No	NA	Class III
YJR136C	s	NA	YJR136C	undetermined	0.147	0	2.7	0.8	2.73	No	No	NA	Class III
YER168C	s	NA	CCA1	undetermined	0.176	0	3	0	2.57	Yes	No	NA	Class III
YGL211W	s	NA	NCS6	Not localized	0.0175	0	3	0	2.33	Yes	No	NA	Class III
YGR015C	s	NA	YGR015C	undetermined	0.0613	0	1.1	0.7	2.07	Yes	No	NA	Class III
YEL047C	s	NA	YEL047C	Not localized	<10E-06	0	0	1.8	1	Yes	No	NA	Class III
YLR165C	s	NA	PUS5	Not localized	0.0175	0	3	0.7	0.38	Yes	No	NA	Class III
YBL087C	s	NA	RPL23A	undetermined	0.127	0	0	0	0	Yes	No	NA	Class III
YBL095W	s	NA	YBL095W	Not localized	0.00372	0	1.8	0	0	Yes	No	NA	Class III
YBR063C	s	NA	YBR063C	Not localized	0.00697	0	0	0	0	No	No	NA	Class III
YBR111C	s	NA	YSA1	Not localized	0.00358	0	0.7	0	0	Yes	No	NA	Class III
YBR230C	s	NA	YBR230C	Not localized	<10E-06	0	0.7	11.8	0	No	No	NA	Class III
YDL230W	s	NA	PTP1	Not localized	0.0307	0	2.2	1.4	0	No	No	NA	Class III
YDR070C	s	NA	FMP16	Not localized	<10E-06	0	0	0	0	No	No	NA	Class III
YDR487C	s	NA	RIB3	Not localized	<10E-06	0	0	2.6	0	Yes	Yes	NA	Class III
YER004W	s	NA	FMP52	Not localized	<10E-06	0	0.9	0	0	Yes	No	NA	Class III
YER048W-A	s	NA	YER048W-A	Not localized	0.00746	0	0.4	4.3	0	No	No	NA	Class III
YFL046W	s	NA	FMP32	undetermined	0.147	0	8.7	0	0	Yes	No	NA	Class III
YGL221C	s	NA	NIF3	Not localized	0.019	0	3.8	0	0	Yes	No	NA	Class III
YGR029W	s	NA	ERV1	undetermined	0.0613	0	0	4.4	0	Yes	Yes	NA	Class III
YGR235C	s	NA	YGR235C	undetermined	0.253	0	1	0.6	0	No	No	NA	Class III
YHR100C	s	NA	YHR100C	Not localized	<10E-06	0	0	0	0	Yes	No	NA	Class III
YIL087C	s	NA	YIL087C	Not localized	<10E-06	0	0	0	0	No	No	NA	Class III
YIR042C	s	NA	YIR042C	Not localized	<10E-06	0	0.7	0	0	Yes	Yes	NA	Class III
YKR049C	s	NA	FMP46	Not localized	<10E-06	0	0.4	11.5	0	No	No	NA	Class III
YLL018C-A	s	NA	COX19	Not localized	0.0223	0	0.5	5.3	0	No	No	NA	Class III
YLR043C	s	NA	TRX1	Not localized	<10E-06	0	0	0.4	0	Yes	No	NA	Class III
YLR270W	s	NA	DCS1	Not localized	<10E-06	0	0	0	0	Yes	No	NA	Class III
YMR152W	s	NA	YIM1	undetermined	0.0746	0	1	3.4	0	Yes	No	NA	Class III
YNL111C	s	NA	CYB5	Not localized	<10E-06	0	0	0	0	No	No	NA	Class III
YNL200C	s	NA	YNL200C	Not localized	<10E-06	0	0	0	0	Yes	No	NA	Class III
YNL211C	s	NA	YNL211C	Not localized	0.0154	0	0	0	0	No	No	NA	Class III
YNR018W	s	NA	YNR018W	Not localized	<10E-06	0	3.6	0	0	No	No	NA	Class III
YOL109W	s	NA	ZEO1	Not localized	<10E-06	0	0	9.6	0	Yes	No	NA	Class III
YOR059C	s	NA	YOR059C	Not localized	0.0051	0	4.1	0	0	Yes	No	NA	Class III
YOR215C	s	NA	YOR215C	Not localized	0.0243	0	7	0	0	Yes	No	NA	Class III
YOR216C	s	NA	RUD3	Not localized	0.0108	0	1.6	0	0	Yes	No	NA	Class III
YOR305W	s	NA	YOR305W	undetermined	0.241	0	0.7	0	0	No	No	NA	Class III
YPL107W	s	NA	YPL107W	Not localized	0.0147	0	7.3	0	0	Yes	No	NA	Class III
YPL108W	s	NA	YPL108W	Not localized	0.0428	0	2	3.2	0	No	No	NA	Class III
YPL148C	s	NA	PPT2	Not localized	0.000303	0	0	0	0	Yes	No	NA	Class III

## Sheet:  Class I
SYSTEMATIC NAME	Module Number	Module name	Standard Name	SAM analysis	SAM q value	MLR (%localisation)	MLR + cycloheximide (%)	MLR + puromycin (%)	MLR Dpuf3 (%)	Procaryotic homologue	Puf3p binding site	Puf3p target	MLR Classification
YOR187W	67	NA	TUF1	Localized	<10E-06	100	51.9	27.2	100	Yes	Yes	Yes	Class I-2
YLR203C	62	Translat,regulatoractivity	MSS51	Localized	<10E-06	100	35.1	24	100	No	Yes	Yes	Class I-2
YLR069C	67	NA	MEF1	Localized	<10E-06	100	51.8	22	100	Yes	Yes	Yes	Class I-2
YER017C	10	Mito,proteintargeting	AFG3	Localized	<10E-06	100	39.3	20.9	100	Yes	Yes	NA	Class I-2
YKL195W	89	NA	MIA40	Localized	<10E-06	100	30.7	19.8	100	Yes	Yes	NA	Class I-2
YBR003W	7	Ubiquinonemet,	COQ1	Localized	<10E-06	100	19.8	15.3	81.68	Yes	Yes	NA	Class I-2
YMR302C	83	NA	PRP12	Localized	<10E-06	100	29.5	11.8	100	No	Yes	NA	Class I-2
YMR089C	10	Mito,proteintargeting	YTA12	Localized	<10E-06	100	43.9	11.2	100	Yes	Yes	NA	Class I-2
YMR024W	79	MRPL	MRPL3	Localized	<10E-06	100	22.6	10.3	100	Yes	Yes	NA	Class I-2
YDR316W	32	RCCasm3	OMS1	Localized	<10E-06	100	17.6	9.2	84.14	Yes	Yes	Yes	Class I-2
YDR061W	s	NA	YDR061W	Localized	<10E-06	100	25.2	5.9	100	Yes	Yes	NA	Class I-2
YMR193W	79	MRPL	MRPL24	Localized	<10E-06	100	11.7	4.8	86.66	Yes	Yes	Yes	Class I-2
YIL070C	41	DNAreplication	MAM33	Localized	<10E-06	100	25.8	2.3	60.46	No	Yes	Yes	Class I-2
YHR011W	66	aamet,	DIA4	Localized	<10E-06	99.1	24.3	9.4	70.76	Yes	Yes	Yes	Class I-2
YMR098C	23	NA	YMR098C	Localized	<10E-06	98.1	33.2	1.9	93.87	Yes	Yes	Yes	Class I-2
YGR165W	99	MRPS	MRPS35	Localized	<10E-06	95.6	18.8	11.9	93.27	No	Yes	Yes	Class I-2
YOR211C	64	Fusion/fission	MGM1	Localized	<10E-06	94.8	13.7	5.9	100	No	Yes	NA	Class I-2
YMR282C	62	Translat,regulatoractivity	AEP2	Localized	<10E-06	94.5	21.1	1.5	81.49	No	Yes	Yes	Class I-2
YJR122W	154	NA	CAF17	Localized	<10E-06	94.4	15.2	26.4	55.08	Yes	Yes	Yes	Class I-2
YDR194C	61	RNAsplicing	MSS116	Localized	<10E-06	94.4	29.1	18.4	100	Yes	Yes	Yes	Class I-2
YPL097W	80	tRNAaminoacyl,	MSY1	Localized	<10E-06	94.2	24.5	0.5	85.82	Yes	Yes	Yes	Class I-2
YPL172C	69	RCCasm4	COX10	Localized	<10E-06	93.4	26.9	14.6	96.17	Yes	Yes	Yes	Class I-2
YPR047W	80	tRNAaminoacyl,	MSF1	Localized	<10E-06	93.4	20.3	5.7	93.66	Yes	Yes	Yes	Class I-2
YLR312W-A	79	MRPL	MRPL15	Localized	<10E-06	93	20.6	6.2	63.62	Yes	Yes	NA	Class I-2
YGR150C	99	MRPS	YGR150C	Localized	<10E-06	90.4	22.4	6.8	76.54	No	Yes	NA	Class I-2
YEL050C	79	MRPL	RML2	Localized	<10E-06	90.3	25.1	15.1	66.05	Yes	Yes	Yes	Class I-2
YIL022W	16	Tim23/Tim22complex	TIM44	Localized	<10E-06	89.6	28.3	24.4	100	Yes	Yes	Yes	Class I-2
YDR268W	129	NA	MSW1	Localized	<10E-06	87.2	18.4	14.4	100	Yes	Yes	NA	Class I-2
YNL177C	79	MRPL	MRPL22	Localized	<10E-06	86.5	27.2	13.3	89.61	Yes	Yes	Yes	Class I-2
YGR084C	99	MRPS	MRP13	Localized	<10E-06	85.1	36.6	12.9	79.95	No	Yes	Yes	Class I-2
YGL107C	126	NA	RMD9	Localized	<10E-06	85	30.9	15.3	81.49	No	Yes	Yes	Class I-2
YDR337W	99	MRPS	MRPS28	Localized	<10E-06	84.7	23.2	7.9	24	Yes	Yes	Yes	Class I-2
YER078C	87	NA	YER078C	Localized	<10E-06	82.5	18.4	13.9	64.6	Yes	Yes	NA	Class I-2
YDR237W	79	MRPL	MRPL7	Localized	<10E-06	81.5	17.9	14.2	14.15	Yes	Yes	Yes	Class I-2
YDR376W	20	Iron-sulfurclusterasm	ARH1	Localized	<10E-06	81	15.2	11.2	53.47	Yes	Yes	NA	Class I-2
YKR016W	2	NA	FMP13	Localized	<10E-06	80.6	28.1	0.8	69.58	Yes	Yes	NA	Class I-2
YHR076W	121	NA	PTC7	Localized	<10E-06	80.4	25.9	13	96.25	Yes	Yes	NA	Class I-2
YMR115W	s	NA	FMP24	Localized	<10E-06	79.9	24.2	5.6	82.81	Yes	Yes	NA	Class I-2
YPL029W	62	Translat,regulatoractivity	SUV3	Localized	<10E-06	79.6	18.2	5.7	76.28	Yes	Yes	Yes	Class I-2
YER141W	20	Iron-sulfurclusterasm	COX15	Localized	<10E-06	78	36.7	11.3	100	Yes	Yes	Yes	Class I-2
YGR112W	18	RCCasm5	SHY1	Localized	<10E-06	77.1	28.6	12	84.86	Yes	Yes	Yes	Class I-2
YHL038C	97	NA	CBP2	Localized	<10E-06	77.1	31	11.7	87.76	No	Yes	NA	Class I-2
YLL048C	s	NA	YBT1	Localized	<10E-06	76.9	34.8	14.6	100	Yes	Yes	NA	Class I-2
YIR024C	122	NA	YIR024C	Localized	<10E-06	75.8	13.7	9.9	54.99	No	Yes	Yes	Class I-2
YMR157C	s	NA	FMP39	Localized	<10E-06	75.7	14.9	16.5	70.27	Yes	Yes	Yes	Class I-2
YJL102W	67	NA	MEF2	Localized	<10E-06	74.9	38.5	9.8	82.3	Yes	No	Yes	Class I-2
YNL252C	79	MRPL	MRPL17	Localized	<10E-06	74.5	19.1	4.2	51.76	No	Yes	Yes	Class I-2
YBR024W	69	RCCasm4	SCO2	Localized	<10E-06	73.7	21.7	2.6	44.58	Yes	Yes	Yes	Class I-2
YNL169C	30	Mito,/cyt,lipidmet,	PSD1	Localized	<10E-06	72.9	15.2	20.2	67.32	Yes	Yes	NA	Class I-2
YBR037C	69	RCCasm4	SCO1	Localized	<10E-06	72.7	20.4	16.5	41.18	Yes	Yes	NA	Class I-2
YPL005W	s	NA	AEP3	Localized	<10E-06	72.6	15.2	7.8	64.76	No	Yes	NA	Class I-2
YKL194C	66	aamet,	MST1	Localized	<10E-06	72.6	24.7	7.5	70.79	Yes	Yes	Yes	Class I-2
YDL202W	79	MRPL	MRPL11	Localized	<10E-06	72.2	21.2	10.3	47.29	Yes	Yes	Yes	Class I-2
YGL119W	7	Ubiquinonemet,	ABC1	Localized	<10E-06	71.9	29.8	15.1	95.3	Yes	Yes	NA	Class I-2
YGL143C	78	NA	MRF1	Localized	<10E-06	71.7	22.8	6.3	80.49	Yes	Yes	Yes	Class I-2
YNL284C	79	MRPL	MRPL10	Localized	<10E-06	71.1	17.8	0	44.38	Yes	Yes	Yes	Class I-2
YGR101W	90	NA	PCP1	Localized	<10E-06	70.6	13.8	9	76.35	Yes	Yes	NA	Class I-2
YBR044C	37	Pyr,/?-ketoglutaratedehy,	TCM62	Localized	<10E-06	70.2	21.4	6.7	54.2	Yes	Yes	NA	Class I-2
YDR393W	s	NA	SHE9	Localized	<10E-06	69.9	12.1	8.7	41.25	Yes	Yes	NA	Class I-2
YGR255C	7	Ubiquinonemet,	COQ6	Localized	<10E-06	69.9	35.2	3.3	70.27	Yes	Yes	NA	Class I-2
YMR207C	12	Fattyacidsyn,	HFA1	Localized	<10E-06	69.3	22.1	5.3	64.5	Yes	Yes	NA	Class I-2
YDL178W	153	NA	DLD2	Localized	<10E-06	68.1	41.3	2	100	Yes	Yes	NA	Class I-2
YJL131C	s	NA	YJL131C	Localized	<10E-06	67.8	24.3	5.4	59.62	No	Yes	NA	Class I-2
YBR192W	87	NA	RIM2	Localized	<10E-06	67.8	8.6	0	42.95	No	No	Yes	Class I-2
YER154W	32	RCCasm3	OXA1	Localized	<10E-06	67.4	23.4	13.6	74.53	Yes	Yes	Yes	Class I-2
YPL040C	84	NA	ISM1	Localized	<10E-06	66.3	29.2	5.4	86.14	Yes	Yes	Yes	Class I-2
YBR185C	10	Mito,proteintargeting	MBA1	Localized	<10E-06	66	27.2	4.8	72.2	No	Yes	Yes	Class I-2
YNL005C	79	MRPL	MRP7	Localized	<10E-06	65.6	21.5	22.7	58.14	Yes	Yes	Yes	Class I-2
YGR171C	146	NA	MSM1	Localized	<10E-06	63.4	19.3	5.1	64.11	Yes	Yes	Yes	Class I-2
YER087W	s	NA	YER087W	Localized	<10E-06	63.2	30.3	2.5	52.33	Yes	Yes	NA	Class I-2
YJR045C	15	Matrixproteinimport	SSC1	Localized	<10E-06	63	28	18	31.19	Yes	No	Yes	Class I-2
YDR296W	79	MRPL	MHR1	Localized	<10E-06	62.5	19.4	13.1	27.69	No	Yes	Yes	Class I-2
YBR146W	99	MRPS	MRPS9	Localized	<10E-06	62.4	26.3	7.4	26.64	Yes	No	Yes	Class I-2
YOL096C	7	Ubiquinonemet,	COQ3	Localized	<10E-06	62.4	23.1	3.3	60.15	Yes	Yes	NA	Class I-2
YDR175C	99	MRPS	RSM24	Localized	<10E-06	61.7	14.5	13.8	17.03	No	Yes	Yes	Class I-2
YJR080C	s	NA	FMP26	Localized	<10E-06	61.2	46.6	4.4	63.26	Yes	Yes	NA	Class I-2
YOR147W	6	Mito,org,andmorph,	MDM32	Localized	<10E-06	60.5	15	2.4	77.32	No	Yes	NA	Class I-2
YKL148C	147	RCC-II	SDH1	Localized	<10E-06	60.4	34.3	7.3	62.75	Yes	Yes	NA	Class I-2
YGL064C	79	MRPL	MRH4	Localized	<10E-06	60.3	28.9	8.2	70.13	Yes	Yes	NA	Class I-2
YDR116C	79	MRPL	MRPL1	Localized	<10E-06	60.3	18.2	0	38.73	Yes	Yes	Yes	Class I-2
YCR024C	s	NA	SLM5	Localized	<10E-06	59.8	19.7	5.6	34.62	Yes	Yes	Yes	Class I-2
YPL132W	69	RCCasm4	COX11	Localized	<10E-06	59.2	16.1	5.8	47.16	Yes	Yes	Yes	Class I-2
YOL033W	31	Glutamatesyn,	MSE1	Localized	<10E-06	58.7	28.9	7.6	58.97	Yes	Yes	Yes	Class I-2
YOL023W	65	NA	IFM1	Localized	<10E-06	58.4	19.4	1.9	62.3	Yes	Yes	Yes	Class I-2
YGR220C	79	MRPL	MRPL9	Localized	<10E-06	58.3	19.3	4.5	27.91	Yes	Yes	Yes	Class I-2
YNR045W	62	Translat,regulatoractivity	PET494	Localized	<10E-06	57.9	18.9	11.6	45.36	No	Yes	Yes	Class I-2
YLR077W	s	NA	FMP25	Localized	<10E-06	57.7	23.8	12.8	67.16	Yes	Yes	NA	Class I-2
YJL054W	16	Tim23/Tim22complex	TIM54	Localized	<10E-06	57.4	18	0	55.2	Yes	Yes	NA	Class I-2
YPR125W	s	NA	YPR125W	Localized	<10E-06	56.6	24.6	6.2	100	No	Yes	NA	Class I-2
YLR139C	28	RCCasm2	SLS1	Localized	<10E-06	55.8	27.9	10.1	49.08	No	Yes	Yes	Class I-2
YMR287C	62	Translat,regulatoractivity	MSU1	Localized	<10E-06	54.9	36	0	59.4	Yes	Yes	Yes	Class I-2
YKL155C	99	MRPS	RSM22	Localized	<10E-06	54.5	24.9	0.3	50.32	Yes	No	Yes	Class I-2
YJL071W	51	Argsyn,	ARG2	Localized	<10E-06	54.4	18.3	11.9	67.26	Yes	No	Yes	Class I-2
YOL027C	28	RCCasm2	MDM38	Localized	<10E-06	54.4	15.6	11.7	43.28	No	Yes	NA	Class I-2
YBL038W	79	MRPL	MRPL16	Localized	<10E-06	54.1	13.1	6.5	23.55	Yes	Yes	NA	Class I-2
YPR140W	14	NA	TAZ1	Localized	<10E-06	53.7	6.2	2.9	57.99	Yes	Yes	Yes	Class I-2
YKR006C	79	MRPL	MRPL13	Localized	<10E-06	52.8	13.3	10.4	14.09	No	Yes	Yes	Class I-2
YFL036W	157	NA	RPO41	Localized	<10E-06	52.7	27.7	14.8	42.02	Yes	Yes	NA	Class I-2
YNL137C	99	MRPS	NAM9	Localized	<10E-06	52.7	30.1	8.6	35.59	Yes	Yes	Yes	Class I-2
YML025C	79	MRPL	YML6	Localized	<10E-06	52.7	20.2	1.9	25.58	Yes	Yes	Yes	Class I-2
YPL224C	119	NA	MMT2	Localized	<10E-06	52.6	17.8	14.9	63.49	Yes	Yes	NA	Class I-2
YHR194W	6	Mito,org,andmorph,	MDM31	Localized	<10E-06	52.6	17.2	11.9	56.06	No	Yes	NA	Class I-2
YDL142C	48	Glycerolmet,	CRD1	Localized	<10E-06	52.6	12.7	3.5	46.76	Yes	Yes	NA	Class I-2
YHL004W	99	MRPS	MRP4	Localized	<10E-06	52.4	25.7	5.3	27.22	Yes	Yes	Yes	Class I-2
YGL068W	79	MRPL	MNP1	Localized	<10E-06	52.3	12	7.9	16.04	Yes	Yes	Yes	Class I-2
YGR147C	74	NA	NAT2	Localized	<10E-06	51.5	14.5	8.7	35.59	No	Yes	Yes	Class I-2
YDR197W	62	Translat,regulatoractivity	CBS2	Localized	<10E-06	51.5	14	0	37.01	Yes	Yes	NA	Class I-2
YPL104W	80	tRNAaminoacyl,	MSD1	Localized	<10E-06	51.4	32.3	11.1	47.11	Yes	Yes	Yes	Class I-2
YPL118W	99	MRPS	MRP51	Localized	<10E-06	51	27.7	12.7	12.18	No	Yes	NA	Class I-2
YJL096W	79	MRPL	MRPL49	Localized	<10E-06	50.7	1.2	4.3	0	Yes	Yes	Yes	Class I-1
YJR100C	14	NA	YJR100C	Localized	<10E-06	49.8	19.3	6	57.05	Yes	Yes	NA	Class I-2
YKL170W	79	MRPL	MRPL38	Localized	<10E-06	49.4	0.3	14.2	3.07	Yes	Yes	Yes	Class I-1
YER077C	101	NA	YER077C	Localized	<10E-06	49.3	14.6	0	71	No	Yes	NA	Class I-2
YGR021W	38	NA	YGR021W	Localized	<10E-06	48.9	17	3.2	5.48	Yes	Yes	Yes	Class I-1
YJR101W	99	MRPS	RSM26	Localized	<10E-06	48.7	17.9	5.1	19.43	Yes	Yes	NA	Class I-2
YIL093C	99	MRPS	RSM25	Localized	<10E-06	48.5	12.2	9.7	4.66	No	Yes	Yes	Class I-1
YLR382C	61	RNAsplicing	NAM2	Localized	<10E-06	48.5	32.1	9.5	68.34	Yes	Yes	Yes	Class I-2
YOR142W	147	RCC-II	LSC1	Localized	<10E-06	47.6	23.7	42	25.27	Yes	Yes	NA	Class I-2
YBR221C	37	Pyr,/?-ketoglutaratedehy,	PDB1	Localized	<10E-06	46.4	56.5	10.3	79.84	Yes	Yes	NA	Class I-2
YJR148W	8	Branchedchainaasyn,	BAT2	Localized	<10E-06	45.5	1.4	84.1	18.67	Yes	Yes	NA	Class I-2
YGR062C	18	RCCasm5	COX18	Localized	<10E-06	45.5	10.3	0	52.55	Yes	Yes	Yes	Class I-2
YDL044C	61	RNAsplicing	MTF2	Localized	<10E-06	44.6	12.8	0	25.08	No	Yes	Yes	Class I-2
YMR188C	99	MRPS	MRPS17	Localized	<10E-06	44	1.1	15.2	0	Yes	Yes	Yes	Class I-1
YER058W	18	RCCasm5	PET117	Localized	<10E-06	43.1	2.8	9.9	0	No	Yes	Yes	Class I-1
YNL071W	37	Pyr,/?-ketoglutaratedehy,	LAT1	Localized	<10E-06	43.1	38.2	0	39.66	Yes	Yes	NA	Class I-2
YNL315C	9	RCCasm1	ATP11	Localized	<10E-06	42.7	8.2	9.5	20.51	No	Yes	Yes	Class I-2
YJL112W	64	Fusion/fission	MDV1	Localized	<10E-06	42.6	5.4	0.8	29.11	Yes	Yes	Yes	Class I-2
YDR430C	37	Pyr,/?-ketoglutaratedehy,	CYM1	Localized	<10E-06	42	25.6	8.3	35.52	Yes	Yes	Yes	Class I-2
YIR021W	61	RNAsplicing	MRS1	Localized	<10E-06	41.8	17.3	0.4	18.35	No	Yes	Yes	Class I-2
YBR120C	62	Translat,regulatoractivity	CBP6	Localized	0.000296	41.4	0.4	0	0	No	Yes	Yes	Class I-1
YDL104C	68	NA	QRI7	Localized	<10E-06	41.3	15.5	0	43.89	Yes	Yes	NA	Class I-2
YMR158W	99	MRPS	MRPS8	Localized	<10E-06	40.2	0.7	8	2.87	Yes	Yes	Yes	Class I-1
YER182W	s	NA	FMP10	Localized	<10E-06	39.7	25.1	6.2	51.7	Yes	Yes	NA	Class I-2
YOR334W	61	RNAsplicing	MRS2	Localized	<10E-06	39.6	9.7	0	39.42	Yes	Yes	NA	Class I-2
YLR218C	137	NA	YLR218C	Localized	<10E-06	38.7	4.3	25.1	7.98	No	Yes	Yes	Class I-2
YPL103C	s	NA	FMP30	Localized	<10E-06	38.7	17.8	6.9	43.56	Yes	Yes	Yes	Class I-2
YLR439W	79	MRPL	MRPL4	Localized	<10E-06	38.5	14.6	15.6	2.8	No	Yes	Yes	Class I-1
YMR293C	s	NA	YMR293C	Localized	<10E-06	38	15.3	3.3	38.44	Yes	Yes	Yes	Class I-2
YHR116W	18	RCCasm5	COX23	Localized	<10E-06	37.7	4.3	27.8	1.76	No	Yes	Yes	Class I-1
YNL073W	53	NA	MSK1	Localized	<10E-06	36.7	10	5.7	12.37	Yes	Yes	Yes	Class I-2
YGL236C	61	RNAsplicing	MTO1	Localized	<10E-06	36.6	20.1	16.3	12.58	Yes	Yes	Yes	Class I-2
YOR158W	99	MRPS	PET123	Localized	<10E-06	36.5	19.7	8.3	0	No	Yes	Yes	Class I-1
YPL173W	79	MRPL	MRPL40	Localized	<10E-06	36.3	2.9	8.7	0	Yes	Yes	Yes	Class I-1
YHL014C	73	NA	YLF2	Localized	<10E-06	36.3	11.6	2.1	27.02	Yes	Yes	Yes	Class I-2
YHR091C	84	NA	MSR1	Localized	<10E-06	36.3	17.3	0	26.04	Yes	Yes	Yes	Class I-2
YBR251W	99	MRPS	MRPS5	Localized	<10E-06	35.6	11.7	0	3.97	Yes	Yes	Yes	Class I-1
YOR354C	s	NA	MSC6	Localized	0.0108	35.1	18.7	4.4	8.15	No	Yes	NA	Class I-2
YHR120W	105	Mismatchrepair	MSH1	Localized	<10E-06	34.3	14.4	3.9	47.08	Yes	Yes	NA	Class I-2
YDL033C	61	RNAsplicing	SLM3	Localized	<10E-06	34	17.9	3	44.48	Yes	Yes	NA	Class I-2
YIL098C	9	RCCasm1	FMC1	Localized	<10E-06	33.8	0	15	0	No	Yes	Yes	Class I-1
YLR253W	14	NA	YLR253W	Localized	<10E-06	33.6	11.5	9.4	22.91	Yes	Yes	Yes	Class I-2
YOR266W	18	RCCasm5	PNT1	Localized	<10E-06	33.6	15.4	0	31.24	No	Yes	NA	Class I-2
YMR257C	62	Translat,regulatoractivity	PET111	Localized	<10E-06	33.1	10.4	0.1	8.32	No	Yes	Yes	Class I-2
YDR258C	15	Matrixproteinimport	HSP78	Localized	<10E-06	32.5	14	7.1	44.45	Yes	Yes	NA	Class I-2
YCR071C	79	MRPL	IMG2	Localized	<10E-06	32	2.7	12.4	0	No	Yes	Yes	Class I-1
YGL136C	118	NA	MRM2	Localized	<10E-06	31.7	7.4	5.8	31.81	Yes	Yes	NA	Class I-2
YDR405W	79	MRPL	MRP20	Localized	<10E-06	31.3	12.3	14.4	4.52	Yes	Yes	Yes	Class I-1
YDR494W	s	NA	RSM28	Localized	0.000166	31.2	16.1	9.5	4.12	No	Yes	NA	Class I-1
YOR232W	15	Matrixproteinimport	MGE1	Localized	<10E-06	31.2	17.9	3.6	0.27	Yes	Yes	NA	Class I-1
YPL168W	110	NA	YPL168W	Localized	<10E-06	31.2	10.8	0	15.71	No	Yes	NA	Class I-2
YDR375C	9	RCCasm1	BCS1	Localized	0.000412	30.9	7.8	7.3	5.46	Yes	Yes	Yes	Class I-1
YLL009C	69	RCCasm4	COX17	Localized	0.00153	30.9	0	5.3	0	No	Yes	Yes	Class I-1
YHR024C	131	NA	MAS2	Localized	<10E-06	30	24.1	13.6	13.08	Yes	No	Yes	Class I-2
YOR201C	108	NA	MRM1	Localized	<10E-06	30	11.4	2.3	43.07	Yes	No	Yes	Class I-2
YLR289W	101	NA	GUF1	Localized	<10E-06	29.8	20.6	0.7	24.92	Yes	Yes	Yes	Class I-2
YDR036C	99	MRPS	EHD3	Localized	<10E-06	29.3	19.9	18.5	13.97	Yes	Yes	Yes	Class I-2
YCR003W	79	MRPL	MRPL32	Localized	0.00561	29	2.2	1.1	0	No	Yes	NA	Class I-1
YMR267W	17	Unknown2	PPA2	Localized	0.000725	28.9	7.6	13.2	7.39	Yes	Yes	NA	Class I-1
YBR122C	79	MRPL	MRPL36	Localized	<10E-06	28.6	1.1	5.8	0	Yes	No	Yes	Class I-1
YJL180C	9	RCCasm1	ATP12	Localized	<10E-06	28.6	16.9	4.2	1.17	Yes	Yes	NA	Class I-1
YKL167C	79	MRPL	MRP49	Localized	<10E-06	28.4	0	4	0	No	Yes	Yes	Class I-1
YBR268W	79	MRPL	MRPL37	Localized	<10E-06	28	2.2	10.7	0	No	Yes	Yes	Class I-1
YGR076C	79	MRPL	MRPL25	Localized	0.000288	27.9	1	7.1	0	No	Yes	Yes	Class I-1
YJL063C	79	MRPL	MRPL8	Localized	<10E-06	27.8	4.4	11.2	2.3	Yes	Yes	Yes	Class I-1
YKL138C	79	MRPL	MRPL31	Localized	0.000416	27.6	1.3	10.8	0	No	Yes	Yes	Class I-1
YHR168W	118	NA	MTG2	Localized	<10E-06	27.2	14.5	1.5	41.3	Yes	Yes	Yes	Class I-2
YIL157C	s	NA	FMP35	Localized	0.000288	26.7	14.5	10.1	0	No	Yes	NA	Class I-1
YPR011C	115	Transport	YPR011C	Localized	<10E-06	24.6	7.5	10	29.94	No	Yes	NA	Class I-2
YPL252C	20	Iron-sulfurclusterasm	YAH1	Localized	0.000302	24.2	1.5	7.5	0	Yes	No	Yes	Class I-1
YMR064W	62	Translat,regulatoractivity	AEP1	Localized	8.49e-05	24.2	11.3	2.5	12.66	No	Yes	NA	Class I-2
YOR222W	5	NA	ODC2	Localized	<10E-06	24.1	1.7	38	28.91	No	Yes	NA	Class I-2
YNR037C	99	MRPS	RSM19	Localized	<10E-06	24.1	1.6	21	0.48	Yes	Yes	Yes	Class I-1
YLR091W	28	RCCasm2	YLR091W	Localized	<10E-06	24.1	8.1	9.8	10.81	No	No	Yes	Class I-2
YLR067C	62	Translat,regulatoractivity	PET309	Localized	0.000288	23.9	22	0	15.76	Yes	Yes	Yes	Class I-2
YFR045W	115	Transport	YFR045W	Localized	<10E-06	23.7	4	0	24.26	No	Yes	NA	Class I-2
YGR028W	10	Mito,proteintargeting	MSP1	Localized	0.00108	23.6	7.1	2.1	12.37	Yes	Yes	Yes	Class I-2
YBL080C	62	Translat,regulatoractivity	PET112	Localized	<10E-06	23.4	20.5	12.5	10.63	Yes	Yes	Yes	Class I-2
YNL306W	99	MRPS	MRPS18	Localized	0.000159	23	6.8	5.3	0	Yes	Yes	Yes	Class I-1
YML129C	18	RCCasm5	COX14	Localized	0.000155	22.6	0	14.6	0	No	Yes	NA	Class I-1
YDL107W	18	RCCasm5	MSS2	Localized	0.000412	22.5	4.8	8.5	1.15	Yes	Yes	Yes	Class I-1
YLR259C	15	Matrixproteinimport	HSP60	Localized	<10E-06	22.4	39.1	0.7	24.56	Yes	Yes	Yes	Class I-2
YPR166C	99	MRPS	MRP2	Localized	0.0283	22.4	0.5	0.5	0	Yes	Yes	NA	Class I-1
YKR085C	79	MRPL	MRPL20	Localized	0.000358	22.1	2.1	0.4	0	No	Yes	Yes	Class I-1
YPL215W	25	NA	CBP3	Localized	<10E-06	21.9	17.7	8.6	6.29	Yes	Yes	NA	Class I-1
YDR347W	99	MRPS	MRP1	undetermined	0.195	21.7	5.9	5.1	0	Yes	Yes	Yes	Class I-1
YDR322W	79	MRPL	MRPL35	Localized	<10E-06	21.7	9.3	2.6	2.53	Yes	Yes	NA	Class I-1
YPL072W	23	NA	UBP16	Localized	<10E-06	21.7	9.2	0	19.35	No	Yes	Yes	Class I-2
YGL129C	99	MRPS	RSM23	Localized	0.000296	21.5	15.7	4.8	13.3	Yes	Yes	Yes	Class I-2
YHR147C	79	MRPL	MRPL6	Localized	<10E-06	21.5	15	3.4	0.64	Yes	Yes	Yes	Class I-1
YMR286W	79	MRPL	MRPL33	Localized	<10E-06	21.4	0	6.9	0	Yes	Yes	NA	Class I-1
YMR166C	28	RCCasm2	YMR166C	Localized	0.000303	21.2	2.1	2.3	4.14	No	Yes	Yes	Class I-1
YJL209W	97	NA	CBP1	Localized	0.00153	20.4	14.2	2.2	16.52	No	Yes	NA	Class I-2
YGL059W	76	NA	YGL059W	Localized	<10E-06	20.1	14.9	2.2	18.25	Yes	Yes	NA	Class I-2
YOR205C	99	MRPS	FMP38	Localized	<10E-06	20	7.2	0	23.37	Yes	Yes	Yes	Class I-2
YBL090W	99	MRPS	MRP21	Localized	0.019	19.7	2.1	5.3	0	Yes	Yes	Yes	Class I-1
YKR065C	143	NA	FMP18	Localized	0.00113	19.5	9	0	9.68	No	Yes	NA	Class I-2
YIL006W	s	NA	YIL006W	Localized	0.000302	19.2	8.1	0.3	11.56	No	Yes	Yes	Class I-2
YMR066W	62	Translat,regulatoractivity	SOV1	Localized	0.0025	19.2	9.9	0	11.11	No	Yes	NA	Class I-2
YER050C	99	MRPS	RSM18	Localized	0.00339	19.1	0	10	0	Yes	Yes	NA	Class I-1
YDR041W	99	MRPS	RSM10	Localized	0.00447	19.1	4	8.1	0	Yes	Yes	Yes	Class I-1
YJR034W	18	RCCasm5	PET191	Localized	0.00339	19.1	0	3.8	0	No	Yes	Yes	Class I-1
YDR115W	79	MRPL	YDR115W	Localized	0.0111	18.9	1	9.3	0	Yes	Yes	Yes	Class I-1
YCR046C	79	MRPL	IMG1	Localized	0.000293	18.4	3.4	11.9	0	Yes	Yes	Yes	Class I-1
YML050W	s	NA	YML050W	Localized	0.000293	18	3.3	6.6	3	Yes	Yes	NA	Class I-1
YCL004W	48	Glycerolmet,	PGS1	Localized	0.000158	18	7.8	1.4	21.64	Yes	Yes	NA	Class I-2
YDR231C	18	RCCasm5	COX20	Localized	0.00174	17.8	2.6	2.7	11.41	No	Yes	NA	Class I-2
YJL104W	16	Tim23/Tim22complex	PAM16	Localized	<10E-06	17.6	0.9	6.3	0	Yes	No	Yes	Class I-1
YOR286W	100	NA	FMP31	Localized	0.000298	17.4	0	15	0	Yes	Yes	Yes	Class I-1
YLR008C	16	Tim23/Tim22complex	PAM18	undetermined	0.247	17.3	0	0	0	Yes	Yes	Yes	Class I-1
YGR082W	49	TOMcomplex	TOM20	Localized	0.000298	17.2	5.7	4.5	7.07	No	Yes	NA	Class I-1
YML009C	79	MRPL	MRPL39	Localized	0.000416	17.2	0	1.3	0	Yes	Yes	Yes	Class I-1
YFR044C	70	NA	YFR044C	Localized	0.0175	17.1	33.3	9.1	35.02	Yes	Yes	NA	Class I-2
YGL018C	20	Iron-sulfurclusterasm	JAC1	Localized	0.000288	16.9	9.3	5.3	4.6	Yes	Yes	NA	Class I-1
YHR002W	102	NA	LEU5	Localized	0.000159	16.9	2.4	0	16.51	No	Yes	NA	Class I-2
YHR038W	s	NA	RRF1	Localized	0.000303	16.9	12.2	0	0	Yes	Yes	Yes	Class I-1
YDR462W	79	MRPL	MRPL28	Localized	0.000296	15.9	0	13.5	0	No	Yes	NA	Class I-1
YNL122C	17	Unknown2	YNL122C	Localized	0.019	15.4	0	3.4	0	Yes	Yes	Yes	Class I-1
YDR079W	18	RCCasm5	PET100	Localized	0.0147	15.4	0.7	2.3	0	No	Yes	Yes	Class I-1
YPR100W	79	MRPL	MRPL51	Localized	0.000298	15.4	5.9	1.9	0	No	Yes	NA	Class I-1
YBL022C	15	Matrixproteinimport	PIM1	undetermined	0.0746	15.2	33.3	0.1	31.62	Yes	Yes	NA	Class I-2
YIL077C	26	NA	YIL077C	Localized	0.000298	14.8	5.6	18.6	12.9	No	Yes	NA	Class I-2
YNR040W	s	NA	YNR040W	Localized	0.00153	14.3	7.8	3.4	1.96	No	Yes	Yes	Class I-1
YNR020C	3	NA	YNR020C	Localized	0.00372	13.8	7.6	10.1	7.77	Yes	Yes	Yes	Class I-1
YLR204W	100	NA	QRI5	Localized	0.0124	13	0.4	5.8	0	No	Yes	NA	Class I-1
YNR022C	79	MRPL	MRPL50	Localized	0.00108	12.5	2.9	0	0	No	Yes	Yes	Class I-1
YNL081C	99	MRPS	SWS2	undetermined	0.169	12.4	0.2	0	0	Yes	Yes	Yes	Class I-1
YNL026W	49	TOMcomplex	SAM50	Localized	0.0025	12.4	4.8	0	24.68	Yes	No	Yes	Class I-2
YNL310C	53	NA	ZIM17	Localized	0.000785	11.9	0.7	0.7	4.38	No	Yes	NA	Class I-1
YGL219C	6	Mito,org,andmorph,	MDM34	Localized	0.00265	11.9	12.4	0	28.7	No	Yes	NA	Class I-2
YNL185C	79	MRPL	MRPL19	Localized	0.0154	11.8	0.9	3.4	0	Yes	Yes	Yes	Class I-1
YJR113C	99	MRPS	RSM7	Localized	0.00201	11	2.4	11.4	0	Yes	Yes	NA	Class I-1
YNL063W	78	NA	MTQ1	undetermined	0.195	10.8	7.2	5.7	9.77	Yes	Yes	NA	Class I-2
YPR133W-A	49	TOMcomplex	TOM5	Localized	0.0141	10.4	0	6.4	0	No	Yes	NA	Class I-1
YLR168C	s	NA	YLR168C	undetermined	0.264	10.2	1.5	4.5	3.5	No	Yes	NA	Class I-1
YLR090W	38	NA	XDJ1	Localized	0.0108	10.2	5.8	2.5	3.96	Yes	Yes	Yes	Class I-1
YMR225C	79	MRPL	MRPL44	undetermined	0.14	10.2	0.2	1.5	0	No	Yes	Yes	Class I-1
YGR169C	s	NA	PUS6	undetermined	0.247	10.1	8.1	3.6	6.02	Yes	Yes	NA	Class I-1
YPR067W	20	Iron-sulfurclusterasm	ISA2	Localized	0.0111	9.4	2.3	7.7	3.14	Yes	Yes	Yes	Class I-1
YKL087C	144	NA	CYT2	Localized	0.0175	9.4	1.8	2.1	0	No	Yes	Yes	Class I-1
YOR297C	16	Tim23/Tim22complex	TIM18	Localized	0.0111	9.1	2.1	0	5.84	Yes	Yes	NA	Class I-1
YBL099W	155	RCC-V	ATP1	Localized	0.00223	9	40.2	2.9	22.91	Yes	Yes	NA	Class I-2
YIL134W	38	NA	FLX1	Localized	0.0428	8.9	2	0	1.12	No	Yes	Yes	Class I-1
YOR020C	15	Matrixproteinimport	HSP10	undetermined	0.0549	8.7	0	9.6	0	Yes	Yes	Yes	Class I-1
YGR257C	9	RCCasm1	MTM1	Localized	0.012	8.6	3.8	8.8	5.85	No	Yes	Yes	Class I-1
YKL003C	99	MRPS	MRP17	Localized	0.0223	8.2	1.5	7.9	0	Yes	Yes	Yes	Class I-1
YHR005C-A	16	Tim23/Tim22complex	MRS11	undetermined	0.275	8.2	0	3.3	0	No	Yes	Yes	Class I-1

## Sheet:  Class II
SYSTEMATIC NAME	Module Number	Module name	Standard Name	SAM analysis	SAM q value	MLR (%localisation)	MLR + cycloheximide (%)	MLR + puromycin (%)	MLR Dpuf3 (%)	Procaryotic homologue	Puf3p binding site	Puf3p target	MLR Classification
YPL270W	96	NA	MDL2	Localized	<10E-06	100	33	11.5	99.18	Yes	No	NA	Class II
YML054C	95	NADmet,/TCAcycle	CYB2	Localized	<10E-06	100	12.1	2.7	100	Yes	No	NA	Class II
YKL134C	s	NA	01-oct,	Localized	<10E-06	100	40.2	10.3	100	Yes	No	NA	Class II
YPL063W	16	Tim23/Tim22complex	TIM50	Localized	<10E-06	100	31.6	13.1	100	No	No	NA	Class II
YDL174C	95	NADmet,/TCAcycle	DLD1	Localized	<10E-06	100	21.9	38.6	100	Yes	No	NA	Class II
YLR142W	s	NA	PUT1	Localized	<10E-06	100	8.8	66.6	100	Yes	No	NA	Class II
YKL217W	104	NA	JEN1	Localized	<10E-06	100	15.6	100	100	Yes	No	NA	Class II
YPR002W	109	NA	PDH1	Localized	<10E-06	100	7.3	100	100	Yes	No	NA	Class II
YBL015W	103	Alcohol/aldehydedehy,	ACH1	Localized	<10E-06	99.7	28.7	43.2	96.17	Yes	No	NA	Class II
YNL104C	8	Branchedchainaasyn,	LEU4	Localized	<10E-06	96.1	33.6	39	100	Yes	No	NA	Class II
YNL121C	49	TOMcomplex	TOM70	Localized	<10E-06	92.8	37.1	11.3	100	Yes	No	NA	Class II
YDR343C	160	NA	HXT6	Localized	<10E-06	92.8	31.1	100	100	Yes	No	NA	Class II
YMR177W	119	NA	MMT1	Localized	<10E-06	89.2	19.6	16.6	75.29	Yes	No	NA	Class II
YNR041C	7	Ubiquinonemet,	COQ2	Localized	<10E-06	88.7	23.1	0	85.18	Yes	No	NA	Class II
YDR342C	160	NA	HXT7	Localized	<10E-06	88.7	24.1	100	100	Yes	No	NA	Class II
YPR024W	83	NA	YME1	Localized	<10E-06	88.6	27.9	13	100	Yes	No	NA	Class II
YMR301C	96	NA	ATM1	Localized	<10E-06	88.2	33.7	16.2	100	Yes	No	NA	Class II
YBR039W	155	RCC-V	ATP3	Localized	<10E-06	87.9	48.3	4.2	77.73	Yes	No	NA	Class II
YPL188W	s	NA	POS5	Localized	<10E-06	87.3	28.5	1.5	97.93	Yes	No	NA	Class II
YMR145C	95	NADmet,/TCAcycle	NDE1	Localized	<10E-06	86.7	36.9	12.6	100	Yes	No	NA	Class II
YLR393W	28	RCCasm2	ATP10	Localized	<10E-06	86.5	31	6.5	100	No	No	NA	Class II
YER014W	56	NA	HEM14	Localized	<10E-06	86.2	37	10.6	100	Yes	No	NA	Class II
YOR330C	s	NA	MIP1	Localized	<10E-06	84.5	25.3	9.6	88.13	Yes	No	NA	Class II
YLR163C	131	NA	MAS1	Localized	<10E-06	83.9	17.7	20.3	50.88	Yes	No	NA	Class II
YMR228W	157	NA	MTF1	Localized	<10E-06	83.3	24.9	9.1	100	Yes	No	NA	Class II
YPL109C	7	Ubiquinonemet,	YPL109C	Localized	<10E-06	82.8	19.5	4.9	81.56	Yes	No	NA	Class II
YER080W	s	NA	FMP29	Localized	<10E-06	82.6	56.8	4.3	99.22	Yes	No	NA	Class II
YOR065W	156	RCC-III	CYT1	Localized	<10E-06	81.8	29.2	3.1	73.23	Yes	No	NA	Class II
YBR014C	s	NA	YBR014C	Localized	<10E-06	80.6	24.9	0	87.03	Yes	No	NA	Class II
YGL008C	158	NA	PMA1	Localized	<10E-06	80.4	25.2	24.8	100	Yes	No	NA	Class II
YIL042C	73	NA	YIL042C	Localized	<10E-06	80	26.5	24.8	74.42	Yes	No	NA	Class II
YJL171C	s	NA	YJL171C	Localized	<10E-06	77.9	31	8.8	100	Yes	No	NA	Class II
YOR017W	97	NA	PET127	Localized	<10E-06	77.2	24.8	13	67.36	No	No	NA	Class II
YLR450W	10	Mito,proteintargeting	HMG2	Localized	<10E-06	77	25	10.1	82.42	Yes	No	NA	Class II
YBL030C	134	NA	PET9	Localized	<10E-06	76.9	18.8	15.6	79.38	No	No	NA	Class II
YOR090C	86	NA	PTC5	Localized	<10E-06	75.4	12.6	7.3	76.87	No	No	NA	Class II
YHR067W	s	NA	HTD2	Localized	<10E-06	75.2	18.5	0	66.95	Yes	No	NA	Class II
YOR356W	95	NADmet,/TCAcycle	YOR356W	Localized	<10E-06	74.7	40.8	0.8	100	Yes	No	NA	Class II
YLR239C	138	NA	LIP2	Localized	<10E-06	74.4	17.1	13.7	40.37	Yes	No	NA	Class II
YHR117W	49	TOMcomplex	TOM71	Localized	<10E-06	73.1	23.5	11.4	89.2	Yes	No	NA	Class II
YCL017C	20	Iron-sulfurclusterasm	NFS1	Localized	<10E-06	73	39.7	11.9	100	Yes	No	NA	Class II
YDL085W	95	NADmet,/TCAcycle	NDE2	Localized	<10E-06	72.7	22.5	96.1	82.11	Yes	No	NA	Class II
YMR062C	51	Argsyn,	ECM40	Localized	<10E-06	70.5	38	26.2	81.87	Yes	No	NA	Class II
YGR012W	59	NA	YGR012W	Localized	<10E-06	70.4	18.4	7.8	79.68	Yes	No	NA	Class II
YML086C	s	NA	ALO1	Localized	<10E-06	69.5	21.3	4	72.2	Yes	No	NA	Class II
YHR198C	s	NA	FMP22	Localized	<10E-06	69.2	4.6	14.3	55.85	Yes	No	NA	Class II
YDR456W	s	NA	NHX1	Localized	<10E-06	69	37.5	10.2	94.56	Yes	No	NA	Class II
YOL048C	s	NA	YOL048C	Localized	<10E-06	68.3	16.8	30.2	45.08	Yes	No	NA	Class II
YDL066W	149	Isocitratemet,	IDP1	Localized	<10E-06	68	49.9	10.4	93.36	Yes	No	NA	Class II
YCL044C	s	NA	YCL044C	Localized	<10E-06	67.9	31	7.7	70.93	No	No	NA	Class II
YLR454W	s	NA	FMP27	Localized	<10E-06	67.9	33	15.5	73.59	No	No	NA	Class II
YLR056W	7	Ubiquinonemet,	ERG3	Localized	<10E-06	67.4	35.8	4.9	85.7	Yes	No	NA	Class II
YGR031W	s	NA	YGR031W	Localized	<10E-06	66.6	20	15.1	64.57	Yes	No	NA	Class II
YDR019C	46	Folateandglycinemet,	GCV1	Localized	<10E-06	66.4	30.4	0.6	100	Yes	No	NA	Class II
YPR155C	s	NA	NCA2	Localized	<10E-06	66	16.5	4.5	83.55	No	No	NA	Class II
YOR374W	103	Alcohol/aldehydedehy,	ALD4	Localized	<10E-06	65.5	24.2	100	85.74	Yes	No	NA	Class II
YFL016C	15	Matrixproteinimport	MDJ1	Localized	<10E-06	65.2	32.4	9.6	64.34	Yes	No	NA	Class II
YKR066C	71	NA	CCP1	Localized	<10E-06	65.2	28.8	7	100	Yes	No	NA	Class II
YJL094C	88	NA	KHA1	Localized	<10E-06	65	19.9	32.4	81.76	Yes	No	NA	Class II
YBR084W	46	Folateandglycinemet,	MIS1	Localized	<10E-06	64.3	34	8.8	82.65	Yes	No	NA	Class II
YER086W	66	aamet,	ILV1	Localized	<10E-06	62.4	47.8	14	100	Yes	No	NA	Class II
YBR263W	46	Folateandglycinemet,	SHM1	Localized	<10E-06	61.9	44.3	15.7	82.69	Yes	No	NA	Class II
YGR049W	142	NA	SCM4	Localized	<10E-06	61.1	15.3	0	79.31	No	No	NA	Class II
YDR204W	7	Ubiquinonemet,	COQ4	Localized	<10E-06	61	30.3	8	58.57	Yes	No	NA	Class II
YBL013W	146	NA	FMT1	Localized	<10E-06	60.9	27.6	16.8	58.11	Yes	No	NA	Class II
YEL052W	s	NA	AFG1	Localized	<10E-06	60.7	26.4	8	86.83	Yes	No	NA	Class II
YPL060W	s	NA	LPE10	Localized	<10E-06	59.9	19.2	0.9	53.79	Yes	No	NA	Class II
YML110C	7	Ubiquinonemet,	COQ5	Localized	<10E-06	59.8	39.5	1.9	72.87	Yes	No	NA	Class II
YDL222C	121	NA	FMP45	Localized	<10E-06	59.8	25.4	68.4	85.18	No	No	NA	Class II
YLR188W	96	NA	MDL1	Localized	<10E-06	59	24.6	2.8	71.99	Yes	No	NA	Class II
YLR369W	20	Iron-sulfurclusterasm	SSQ1	Localized	<10E-06	58.9	27.6	4.8	47.43	Yes	No	NA	Class II
YDR518W	s	NA	EUG1	Localized	<10E-06	58.8	30.8	9.7	80.68	No	No	NA	Class II
YBR029C	48	Glycerolmet,	CDS1	Localized	<10E-06	58.8	27.8	1.6	88.66	Yes	No	NA	Class II
YOR108W	102	NA	LEU9	Localized	<10E-06	58.5	23.5	16.5	83.55	Yes	No	NA	Class II
YAL010C	6	Mito,org,andmorph,	MDM10	Localized	<10E-06	57.3	7.5	0	53.76	No	No	NA	Class II
YLR304C	149	Isocitratemet,	ACO1	Localized	<10E-06	56.9	61.3	6.6	91.74	Yes	No	NA	Class II
YBR026C	43	NA	ETR1	Localized	<10E-06	56.7	38	8.9	72.13	Yes	No	NA	Class II
YCR099C	141	NA	YCR099C	Localized	<10E-06	56.5	9.2	0	68.58	No	No	NA	Class II
YJR144W	35	ResponsetoDNAdamage	MGM101	Localized	<10E-06	55.8	20.5	0	29.94	No	No	NA	Class II
YCR005C	95	NADmet,/TCAcycle	CIT2	Localized	<10E-06	55.5	0	67.3	21.21	Yes	No	NA	Class II
YMR252C	s	NA	YMR252C	Localized	<10E-06	55.4	12.9	11.3	52.75	No	No	NA	Class II
YJR051W	71	NA	OSM1	Localized	<10E-06	55.1	31.7	0	58.02	Yes	No	NA	Class II
YDL015C	30	Mito,/cyt,lipidmet,	TSC13	Localized	<10E-06	55.1	35.9	6.7	87.64	Yes	No	NA	Class II
YGR286C	113	NA	BIO2	Localized	<10E-06	54.9	19.4	11.2	65.06	Yes	No	NA	Class II
YBR078W	85	NA	ECM33	Localized	<10E-06	54.6	27.4	11.7	90.32	Yes	No	NA	Class II
YIL155C	48	Glycerolmet,	GUT2	Localized	<10E-06	52.9	32.2	3.3	94.73	Yes	No	NA	Class II
YML042W	123	NA	CAT2	Localized	<10E-06	52.8	20.6	46.2	74.64	Yes	No	NA	Class II
YCL064C	66	aamet,	CHA1	Localized	<10E-06	51.2	22.1	0	100	Yes	No	NA	Class II
YOL008W	s	NA	YOL008W	Localized	<10E-06	51.1	16.3	0.6	49.25	Yes	No	NA	Class II
YNL168C	40	NA	FMP41	Localized	<10E-06	51	23.9	4.1	58.02	Yes	No	NA	Class II
YBR227C	15	Matrixproteinimport	MCX1	Localized	<10E-06	50.5	29.2	11	64.93	Yes	No	NA	Class II
YDR384C	124	NA	ATO3	Localized	<10E-06	49.5	44.1	100	66.05	Yes	No	NA	Class II
YJR048W	71	NA	CYC1	Localized	<10E-06	49.2	0	2.2	0	Yes	No	NA	Class II
YJL060W	26	NA	BNA3	Localized	<10E-06	49.2	21.3	1.3	57.41	Yes	No	NA	Class II
YPL222W	s	NA	FMP40	Localized	<10E-06	49.1	24.5	22	64.4	Yes	No	NA	Class II
YML120C	95	NADmet,/TCAcycle	NDI1	Localized	<10E-06	48.8	43.4	0	61.03	Yes	No	NA	Class II
YER053C	s	NA	PIC2	Localized	<10E-06	48.1	11.8	1	55.41	No	No	NA	Class II
YDR350C	9	RCCasm1	TCM10	Localized	<10E-06	45.3	13.1	1.1	54.38	No	No	NA	Class II
YJR121W	155	RCC-V	ATP2	Localized	<10E-06	44.7	67.1	0.5	79.31	Yes	No	NA	Class II
YNL066W	133	NA	SUN4	Localized	<10E-06	44.6	8.1	48.4	56.81	No	No	NA	Class II
YKL027W	s	NA	YKL027W	Localized	<10E-06	43.9	14.4	0	70.41	Yes	No	NA	Class II
YOR196C	138	NA	LIP5	Localized	<10E-06	43.9	27.7	0.3	78.81	Yes	No	NA	Class II
YLR087C	34	NA	CSF1	Localized	<10E-06	43.6	18.2	7.6	46.65	No	No	NA	Class II
YGL104C	126	NA	VPS73	Localized	<10E-06	42.8	23.3	6.4	56.87	Yes	No	NA	Class II
YBR106W	55	NA	PHO88	Localized	<10E-06	42.3	28.5	0	56.21	No	No	NA	Class II
YLL006W	6	Mito,org,andmorph,	MMM1	Localized	<10E-06	42.1	18.3	5.6	55.94	No	No	NA	Class II
YPR001W	95	NADmet,/TCAcycle	CIT3	Localized	<10E-06	42	14.8	100	60.65	Yes	No	NA	Class II
YMR097C	s	NA	MTG1	Localized	<10E-06	40.5	21.2	0	50.21	Yes	No	NA	Class II
YIL136W	109	NA	OM45	Localized	<10E-06	40.1	26	16.7	46.07	Yes	No	NA	Class II
YOR125C	7	Ubiquinonemet,	CAT5	Localized	<10E-06	39.8	12.7	0.5	9.53	Yes	No	NA	Class II
YDL198C	13	NA	GGC1	Localized	<10E-06	38.4	4.2	12.8	26.72	No	No	NA	Class II
YKL157W	29	NA	APE2	Localized	<10E-06	37.7	28.1	2.6	84.3	Yes	No	NA	Class II
YDR232W	19	NA	HEM1	Localized	<10E-06	37.6	30	9.2	69.92	Yes	No	NA	Class II
YHL021C	90	NA	FMP12	Localized	<10E-06	37.5	16.3	36.3	27.93	Yes	No	NA	Class II
YLR036C	143	NA	YLR036C	Localized	<10E-06	37.3	8.1	0	18.22	No	No	NA	Class II
YKR070W	s	NA	YKR070W	Localized	<10E-06	35.8	21.9	0	49.36	Yes	No	NA	Class II
YKL141W	147	RCC-II	SDH3	Localized	<10E-06	34.8	12.5	14	45.26	Yes	No	NA	Class II
YPR116W	s	NA	YPR116W	Localized	<10E-06	33.6	14	10.4	34.46	No	No	NA	Class II
YNR001C	95	NADmet,/TCAcycle	CIT1	Localized	<10E-06	33.6	34.3	17.9	66.99	Yes	No	NA	Class II
YML061C	112	NA	PIF1	Localized	<10E-06	33.4	9.4	2.6	32.65	Yes	No	NA	Class II
YER069W	51	Argsyn,	ARG5,6	Localized	<10E-06	33.1	27.8	11.6	68.89	Yes	No	NA	Class II
YNR002C	124	NA	FUN34	Localized	<10E-06	32.3	6.5	82.2	42.29	Yes	No	NA	Class II
YER170W	41	DNAreplication	ADK2	Localized	<10E-06	32.2	9.5	8.3	6.24	Yes	No	NA	Class II
YDL027C	43	NA	YDL027C	Localized	<10E-06	31.6	28.7	0	44.64	No	No	NA	Class II
YKR042W	133	NA	UTH1	Localized	<10E-06	31.6	11.3	27.2	47.48	No	No	NA	Class II
YJR016C	8	Branchedchainaasyn,	ILV3	Localized	<10E-06	31.2	50.2	8.8	51.76	Yes	No	NA	Class II
YMR108W	8	Branchedchainaasyn,	ILV2	Localized	<10E-06	31	28.7	19	59.09	Yes	No	NA	Class II
YPL262W	95	NADmet,/TCAcycle	FUM1	Localized	<10E-06	30.7	27.9	42.5	32.48	Yes	No	NA	Class II
YHL032C	48	Glycerolmet,	GUT1	Localized	<10E-06	30.4	8.9	38.7	29.4	Yes	No	NA	Class II
YDL119C	68	NA	YDL119C	Localized	<10E-06	30	5.2	0	21.48	No	No	NA	Class II
YGR234W	1	RCC-IV	YHB1	undetermined	0.154	29.5	2.5	17.9	22.31	Yes	No	NA	Class II
YDR470C	64	Fusion/fission	UGO1	Localized	<10E-06	29	6.4	4.4	7.71	No	No	NA	Class II
YJR109C	24	Glutaminefamilymet,	CPA2	Localized	<10E-06	28.6	3.4	48	49.63	Yes	No	NA	Class II
YPL036W	158	NA	PMA2	Localized	<10E-06	28.3	32.6	28.3	41.77	Yes	No	NA	Class II
YOR022C	110	NA	YOR022C	Localized	<10E-06	28.2	18.3	1.8	30.88	Yes	No	NA	Class II
YER061C	12	Fattyacidsyn,	CEM1	Localized	<10E-06	27.8	19.1	4.8	58.63	Yes	No	NA	Class II
YFL018C	37	Pyr,/?-ketoglutaratedehy,	LPD1	Localized	<10E-06	26.9	28.5	6.8	37.45	Yes	No	NA	Class II
YER024W	123	NA	YAT2	Localized	0.000158	26.8	0.1	92.7	16.82	Yes	No	NA	Class II
YDR120C	s	NA	TRM1	Localized	<10E-06	26.6	5.7	9.8	16.33	Yes	No	NA	Class II
YGR033C	16	Tim23/Tim22complex	TIM21	Localized	<10E-06	26.6	11.6	6.7	25.23	No	No	NA	Class II
YHR199C	s	NA	FMP34	Localized	<10E-06	26.5	14.1	15.6	49.44	Yes	No	NA	Class II
YPR006C	109	NA	ICL2	Localized	<10E-06	26.3	8.1	71.4	27.24	Yes	No	NA	Class II
YMR241W	30	Mito,/cyt,lipidmet,	YHM2	Localized	<10E-06	26.3	12.1	0	37.71	No	No	NA	Class II
YPR004C	95	NADmet,/TCAcycle	YPR004C	Localized	0.000156	25.8	28.1	0	26.35	Yes	No	NA	Class II
YJL200C	149	Isocitratemet,	YJL200C	Localized	<10E-06	25.7	14.9	4.9	51.64	Yes	No	NA	Class II
YBL057C	130	NA	PTH2	Localized	<10E-06	25.4	7.1	2.1	13.62	Yes	No	NA	Class II
YGR231C	6	Mito,org,andmorph,	PHB2	Localized	<10E-06	25.4	19	6.6	22.29	Yes	No	NA	Class II
YLR348C	s	NA	DIC1	Localized	<10E-06	25	5.7	28.7	17.77	No	No	NA	Class II
YIL125W	37	Pyr,/?-ketoglutaratedehy,	KGD1	Localized	<10E-06	24.8	41.6	2.6	43.25	Yes	No	NA	Class II
YKR087C	32	RCCasm3	OMA1	Localized	<10E-06	24.6	12.2	0	35.81	Yes	No	NA	Class II
YKL011C	122	NA	CCE1	Localized	<10E-06	24.5	10.5	2.4	24.26	No	No	NA	Class II
YDR148C	37	Pyr,/?-ketoglutaratedehy,	KGD2	Localized	<10E-06	24.5	43.1	0	55.97	Yes	No	NA	Class II
YIL094C	19	NA	LYS12	Localized	<10E-06	24.4	27	4.8	35.84	Yes	No	NA	Class II
YHR003C	s	NA	YHR003C	Localized	<10E-06	23.9	16.8	4.8	41.52	Yes	No	NA	Class II
YIL149C	s	NA	MLP2	Localized	0.000162	23.4	13.3	2.8	43.05	Yes	No	NA	Class II
YOR114W	s	NA	YOR114W	Localized	<10E-06	23.2	3.7	0	22.38	No	No	NA	Class II
YAL008W	s	NA	FUN14	Localized	0.000155	22.7	14.2	0	14.41	No	No	NA	Class II
YHR208W	8	Branchedchainaasyn,	BAT1	Localized	<10E-06	22.3	42.8	0	19.04	Yes	No	NA	Class II
YLR426W	s	NA	YLR426W	Localized	<10E-06	22.3	10.9	2.2	25.94	Yes	No	NA	Class II
YNL125C	s	NA	ESBP6	Localized	<10E-06	21.2	6.5	4.3	28.91	Yes	No	NA	Class II
YBR069C	70	NA	TAT1	Localized	0.000731	21	23.7	47.6	76.43	Yes	No	NA	Class II
YOR130C	51	Argsyn,	ORT1	Localized	0.000162	20.9	0.5	22.2	17.49	No	No	NA	Class II
YJL023C	s	NA	PET130	Localized	0.000159	20.2	5.8	8.9	17.62	No	No	NA	Class II
YGR094W	35	ResponsetoDNAdamage	VAS1	Localized	0.000156	20.2	9.6	5.2	42.75	Yes	No	NA	Class II
YHR037W	31	Glutamatesyn,	PUT2	Localized	0.000293	19.9	38.7	1.7	32.2	Yes	No	NA	Class II
YDR129C	153	NA	SAC6	Localized	0.000476	19.9	1.5	17.1	34.53	No	No	NA	Class II
YCL014W	79	MRPL	BUD3	Localized	0.0342	19.6	3.6	13	16.46	No	No	NA	Class II
YJR077C	70	NA	MIR1	Localized	0.000424	19.6	9.3	4.7	41.27	No	No	NA	Class II
YNL213C	s	NA	YNL213C	Localized	0.000165	19.4	6.1	4	7.14	Yes	No	NA	Class II
YPL004C	29	NA	LSP1	Localized	0.000725	19.3	0	49.4	7.4	Yes	No	NA	Class II
YLR106C	85	NA	MDN1	Localized	<10E-06	19.3	9.7	9.7	35.61	No	No	NA	Class II
YLL041C	147	RCC-II	SDH2	Localized	0.000358	19	39.6	0	15.5	Yes	No	NA	Class II
YKL218C	11	NA	SRY1	Localized	0.000162	18.5	4.9	49.6	24.64	Yes	No	NA	Class II
YPL134C	63	NA	ODC1	Localized	0.000165	18.3	5.2	7.7	26.14	No	No	NA	Class II
YOR350C	s	NA	MNE1	Localized	<10E-06	18.2	19	0	39.28	No	No	NA	Class II
YKR036C	154	NA	CAF4	Localized	0.000158	18	8.4	2.9	23.98	Yes	No	NA	Class II
YOL140W	51	Argsyn,	ARG8	Localized	0.000229	17.9	11.3	0	37.5	Yes	No	NA	Class II
YHR106W	111	NA	TRR2	Localized	<10E-06	17.7	5.7	11.6	16.35	Yes	No	NA	Class II
YOR176W	56	NA	HEM15	Localized	0.00476	17.7	22.4	4.5	36.16	Yes	No	NA	Class II
YOR136W	149	Isocitratemet,	IDH2	Localized	0.00322	17.2	15.8	13.8	18.05	Yes	No	NA	Class II
YNL037C	149	Isocitratemet,	IDH1	Localized	0.000156	16	31.3	11.9	25.85	Yes	No	NA	Class II
YGL080W	s	NA	FMP37	Localized	0.0164	15.6	4.4	49	13.41	No	No	NA	Class II
YNL328C	s	NA	MDJ2	Localized	0.000778	14.9	3.1	0	4.33	Yes	No	NA	Class II
YOR037W	93	NA	CYC2	Localized	0.00314	14.8	12.9	0.8	11.77	Yes	No	NA	Class II
YDR234W	8	Branchedchainaasyn,	LYS4	Localized	0.00042	14.4	15.7	9.2	31.92	Yes	No	NA	Class II
YPL135W	20	Iron-sulfurclusterasm	ISU1	Localized	0.00444	14.1	0	32.1	11.9	Yes	No	NA	Class II
YJL133W	61	RNAsplicing	MRS3	Localized	0.00476	14.1	1.5	13.7	12.56	No	No	NA	Class II
YJR111C	s	NA	YJR111C	Localized	0.00158	13.9	12.5	10.6	41.22	Yes	No	NA	Class II
YJL005W	36	NA	CYR1	undetermined	0.169	13.6	6.8	8	16.01	Yes	No	NA	Class II
YPL078C	155	RCC-V	ATP4	Localized	0.01	13.5	32.3	0	24.17	No	No	NA	Class II
YDR538W	7	Ubiquinonemet,	PAD1	Localized	0.000474	13.4	4.9	3.1	17.82	Yes	No	NA	Class II
YBR121C	19	NA	GRS1	undetermined	0.161	13.1	4.9	4	25.81	Yes	No	NA	Class II
YBL045C	156	RCC-III	COR1	undetermined	0.195	12.6	31.5	4.1	7.52	Yes	No	NA	Class II
YER032W	159	NA	FIR1	undetermined	0.116	12.6	3	13.8	9.6	Yes	No	NA	Class II
YKR052C	61	RNAsplicing	MRS4	Localized	0.00153	12.4	1.2	12.3	11.27	No	No	NA	Class II
YGL125W	46	Folateandglycinemet,	MET13	undetermined	0.0549	12.4	3.5	24.1	12.8	Yes	No	NA	Class II
YBR047W	s	NA	FMP23	Localized	0.00339	12.2	0.8	13.2	13.67	No	No	NA	Class II
YBR176W	8	Branchedchainaasyn,	ECM31	Localized	0.00402	12.2	16.7	0	20.14	Yes	No	NA	Class II
YNL009W	149	Isocitratemet,	IDP3	Localized	0.00153	11.8	6.4	63	12.46	Yes	No	NA	Class II
YHR017W	2	NA	YSC83	undetermined	0.0881	11.8	3.9	4.8	15.17	Yes	No	NA	Class II
YIL043C	148	NA	CBR1	Localized	0.00153	11.7	21.1	0	30.75	Yes	No	NA	Class II
YAR035W	123	NA	YAT1	Localized	0.00223	11.5	2.1	100	21.26	Yes	No	NA	Class II
YDR236C	s	NA	FMN1	Localized	0.00746	11	7.2	0	15.17	Yes	No	NA	Class II
YMR165C	s	NA	SMP2	Localized	0.0025	10.5	1.6	6	16.91	Yes	No	NA	Class II
YGR244C	147	RCC-II	LSC2	undetermined	0.109	10.2	43	12.3	19.98	Yes	No	NA	Class II
YBR163W	25	NA	DEM1	Localized	0.0134	10	9.1	2.9	12.5	No	No	NA	Class II
YDR069C	37	Pyr,/?-ketoglutaratedehy,	DOA4	undetermined	0.183	9.8	2	8.8	7.52	No	No	NA	Class II
YOR100C	115	Transport	CRC1	Localized	0.00322	9.8	6.2	100	11.96	No	No	NA	Class II
YPL091W	111	NA	GLR1	Localized	0.0198	9.8	7.7	7.5	17.27	Yes	No	NA	Class II
YLL001W	64	Fusion/fission	DNM1	Localized	0.00402	9.7	2.2	1.6	10.93	No	No	NA	Class II
YDR336W	135	NA	YDR336W	Localized	0.00811	9.7	3.3	3.5	11.48	Yes	No	NA	Class II
YPR134W	61	RNAsplicing	MSS18	Localized	0.0141	9.6	18.7	11.6	19.74	No	No	NA	Class II
YAL054C	103	Alcohol/aldehydedehy,	ACS1	undetermined	0.067	9.5	22.5	100	21.66	Yes	No	NA	Class II
YNL100W	77	NA	YNL100W	Localized	0.0223	9.4	4.3	1.9	1.73	No	No	NA	Class II
YOL059W	48	Glycerolmet,	GPD2	Localized	0.00339	9.3	4.2	26.1	31.22	Yes	No	NA	Class II
YGR243W	s	NA	FMP43	Localized	0.0111	9.1	0	11.9	12.22	No	No	NA	Class II
YEL017C-A	158	NA	PMP2	Localized	0.0385	9	24.3	10.8	53.42	No	No	NA	Class II
YHR162W	s	NA	YHR162W	undetermined	0.109	8.6	0	69	18.16	No	No	NA	Class II
YJL147C	s	NA	YJL147C	undetermined	0.0549	8.5	14.5	0.1	7.39	No	No	NA	Class II
YHR189W	130	NA	PTH1	Localized	0.0141	8.3	3	8.9	6.7	Yes	No	NA	Class II
YOL042W	s	NA	NGL1	undetermined	0.14	8.3	15.8	0	12.55	Yes	No	NA	Class II
YEL030W	15	Matrixproteinimport	ECM10	Localized	0.0141	8.2	4.5	2.9	6.87	Yes	No	NA	Class II
YIL066C	41	DNAreplication	RNR3	Localized	0.012	8.1	3.7	28.5	10.97	Yes	No	NA	Class II
YCL057W	s	NA	PRD1	undetermined	0.14	8	11.5	2.3	18.25	Yes	No	NA	Class II

## Sheet: Class III non MLR
SYSTEMATIC NAME	Module Number	Module name	Standard Name	SAM analysis	SAM q value	MLR (%localisation)	MLR + cycloheximide (%)	MLR + puromycin (%)	MLR Dpuf3 (%)	Procaryotic homologue	Puf3p binding site	Puf3p target	MLR Classification
YBR179C	64	Fusion/fission	FZO1	undetermined	0.253	5.1	2.7	0.6	7.7	Yes	Yes	Yes	Class III
YNL083W	115	Transport	SAL1	Localized	0.0198	7.3	2.1	9.4	7.1	No	Yes	Yes	Class III
YJL046W	s	NA	YJL046W	Localized	0.012	5.6	4.1	0	6.67	Yes	Yes	Yes	Class III
YPL059W	20	Iron-sulfurclusterasm	GRX5	Not localized	<10E-06	0	0	0	0	Yes	Yes	Yes	Class III
YBR282W	79	MRPL	MRPL27	undetermined	0.283	2.9	0.4	0.3	0	No	Yes	Yes	Class III
YOR150W	79	MRPL	MRPL23	undetermined	NA	0.2	0	0	0	Yes	Yes	Yes	Class III
YNR036C	99	MRPS	YNR036C	undetermined	0.215	5.7	0	11	0	Yes	Yes	Yes	Class III
YPL013C	99	MRPS	MRPS16	undetermined	NA	4.8	2.4	2.2	0	Yes	Yes	Yes	Class III
YHR059W	99	MRPS	FYV4	undetermined	NA	1.1	1.5	1.6	0	No	Yes	Yes	Class III
YOL071W	11	NA	EMI5	undetermined	0.275	2.1	3.7	4.6	0	Yes	Yes	Yes	Class III
YDR511W	18	NA	ACN9	undetermined	0.161	6	0.7	1	0	No	Yes	Yes	Class III
YBR262C	47	NA	FMP51	undetermined	0.296	1.9	0.4	6.6	0	No	Yes	Yes	Class III
YGL226W	47	NA	YGL226W	undetermined	0.29	1.4	3.5	5.8	0	No	Yes	Yes	Class III
YAL039C	56	NA	CYC3	undetermined	0.0746	0	1	2.3	0	No	Yes	Yes	Class III
YJL143W	16	Tim23/Tim22complex	TIM17	undetermined	0.247	1.2	0.4	2.1	0	No	Yes	Yes	Class III
YEL020W-A	16	Tim23/Tim22complex	TIM9	Not localized	0.00897	0	0	0	0	No	Yes	Yes	Class III
YNR017W	16	Tim23/Tim22complex	MAS6	undetermined	0.0953	0	0.8	4.3	0	No	Yes	Yes	Class III
YOR045W	49	TOMcomplex	TOM6	undetermined	0.26	3.1	0	6.3	0	No	Yes	Yes	Class III
YDL131W	8	Branchedchainaasyn,	LYS21	undetermined	NA	2.6	0.1	7.9	19.74	Yes	No	Yes	Class III
YNL131W	49	TOMcomplex	TOM22	undetermined	0.116	0.8	0	7.7	0	No	No	Yes	Class III
YOR335C	31	Glutamatesyn,	ALA1	undetermined	0.0549	0	6.9	0	24.04	Yes	Yes	NA	Class III
YBR208C	37	Pyr,/?-ketoglutaratedehy,	DUR1,2	undetermined	0.127	7.3	4.8	8.3	15.96	Yes	Yes	NA	Class III
YDR065W	s	NA	YDR065W	undetermined	0.228	0.6	9	0	12.77	No	Yes	NA	Class III
YMR023C	61	RNAsplicing	MSS1	undetermined	0.208	4.5	8.1	0	11.74	Yes	Yes	NA	Class III
YOL081W	36	NA	IRA2	undetermined	0.296	0.5	7.1	11.9	11.66	No	Yes	NA	Class III
YGL169W	78	NA	SUA5	undetermined	0.169	0	3.2	0	10.56	Yes	Yes	NA	Class III
YJR140C	41	DNAreplication	HIR3	undetermined	0.298	3.6	4	0.6	10	Yes	Yes	NA	Class III
YNL064C	70	NA	YDJ1	Not localized	0.00561	0	0	0	7.09	Yes	Yes	NA	Class III
YMR038C	81	NA	CCS1	undetermined	0.169	0	0	7.1	6.76	Yes	Yes	NA	Class III
YOR274W	s	NA	MOD5	undetermined	0.228	0	4.9	0	6.45	Yes	Yes	NA	Class III
YNL292W	65	NA	PUS4	undetermined	0.0746	7.5	2.8	2.2	6.42	Yes	Yes	NA	Class III
YLR201C	3	NA	FMP53	undetermined	0.14	2.6	15.3	0.8	3.18	Yes	Yes	NA	Class III
YMR203W	49	TOMcomplex	TOM40	undetermined	0.221	0	3.3	0	2.39	No	Yes	NA	Class III
YKR064W	86	NA	YKR064W	undetermined	0.234	0	1.4	1	1.9	No	Yes	NA	Class III
YDL217C	16	Tim23/Tim22complex	TIM22	undetermined	0.241	4.5	3.3	1.3	1.84	No	Yes	NA	Class III
YLR283W	27	Unknown1	YLR283W	undetermined	0.228	2.3	11.5	0	1.47	Yes	Yes	NA	Class III
YKL040C	20	Iron-sulfurclusterasm	NFU1	Not localized	0.0051	0	16.2	3.3	1.26	Yes	Yes	NA	Class III
YPL099C	s	NA	FMP14	undetermined	0.247	6.6	4.4	12.1	1.13	No	Yes	NA	Class III
YKL208W	s	NA	CBT1	undetermined	NA	3.7	5.5	3.8	1.07	No	Yes	NA	Class III
YAL044C	46	Folateandglycinemet,	GCV3	Not localized	<10E-06	0	0.2	0	0	Yes	Yes	NA	Class III
YGR132C	6	Mito,org,andmorph,	PHB1	undetermined	0.0953	0	4.3	2.8	0	Yes	Yes	NA	Class III
YJL066C	6	Mito,org,andmorph,	MPM1	Not localized	0.000836	0	1.1	0	0	No	Yes	NA	Class III
YPL183W-A	79	MRPL	YPL183W-A	undetermined	0.0613	0	0.3	0	0	Yes	Yes	NA	Class III
YGR215W	99	MRPS	RSM27	undetermined	0.288	7.9	2.6	4.5	0	No	Yes	NA	Class III
YDL045W-A	99	MRPS	MRP10	undetermined	NA	3.5	0	0	0	No	Yes	NA	Class III
YLR390W	18	NA	ECM19	undetermined	NA	1.1	0	5	0	No	Yes	NA	Class III
YGR174C	25	NA	CBP4	undetermined	0.298	1.5	3.4	9.1	0	Yes	Yes	NA	Class III
YDL157C	77	NA	YDL157C	Not localized	<10E-06	0	2.4	0	0	No	Yes	NA	Class III
YLR193C	88	NA	YLR193C	undetermined	0.26	3.9	0	6.7	0	No	Yes	NA	Class III
YKL192C	108	NA	ACP1	undetermined	0.215	2.5	0.1	8.8	0	Yes	Yes	NA	Class III
YCR083W	111	NA	TRX3	Not localized	<10E-06	0	0	0	0	Yes	Yes	NA	Class III
YJL121C	129	NA	RPE1	Not localized	<10E-06	0	0	0	0	Yes	Yes	NA	Class III
YAL015C	136	NA	NTG1	undetermined	0.208	0.1	3.2	10	0	Yes	Yes	NA	Class III
YFR011C	s	NA	YFR011C	undetermined	0.247	4.2	1.6	7.3	0	No	Yes	NA	Class III
YDR487C	s	NA	RIB3	Not localized	<10E-06	0	0	2.6	0	Yes	Yes	NA	Class III
YGR029W	s	NA	ERV1	undetermined	0.0613	0	0	4.4	0	Yes	Yes	NA	Class III
YIR042C	s	NA	YIR042C	Not localized	<10E-06	0	0.7	0	0	Yes	Yes	NA	Class III
YGR207C	95	NADmet,/TCAcycle	YGR207C	undetermined	0.14	0	15.6	0	0	Yes	Yes	NA	Class III
YLR395C	1	RCC-IV	COX8	Not localized	0.0051	0	0	0	0	No	Yes	NA	Class III
YDR322C-A	155	RCC-V	TIM11	undetermined	0.183	0	0.8	3.3	0	No	Yes	NA	Class III
YML081C-A	155	RCC-V	ATP18	Not localized	<10E-06	0	0.5	0	0	No	Yes	NA	Class III
YOL077W-A	155	RCC-V	ATP19	Not localized	<10E-06	0	0	0	0	No	Yes	NA	Class III
YCR028C-A	35	ResponsetoDNAdamage	RIM1	Not localized	0.00137	0	0	3.6	0	Yes	Yes	NA	Class III
YBR091C	16	Tim23/Tim22complex	MRS5	undetermined	0.147	0	0	0	0	No	Yes	NA	Class III
YGR181W	16	Tim23/Tim22complex	TIM13	Not localized	0.0154	0	0	3	0	No	Yes	NA	Class III
YJR135W-A	16	Tim23/Tim22complex	TIM8	undetermined	0.103	0	0	7	0	No	Yes	NA	Class III
YNL070W	49	TOMcomplex	TOM7	Not localized	0.0175	0	0	3.7	0	No	Yes	NA	Class III
YPR021C	115	Transport	AGC1	undetermined	NA	0.8	0.9	0	0	No	Yes	NA	Class III
YJL003W	27	Unknown1	COX16	Not localized	0.00746	0	4.7	3	0	No	Yes	NA	Class III
YDR493W	17	Unknown2	FMP36	undetermined	0.147	0	0	0	0	No	Yes	NA	Class III
YKL150W	148	NA	MCR1	undetermined	0.283	3.4	16.1	0	50.24	Yes	No	NA	Class III
YKL182W	12	Fattyacidsyn,	FAS1	Not localized	0.00108	0	2.3	0	35.47	Yes	No	NA	Class III
YPL231W	12	Fattyacidsyn,	FAS2	undetermined	0.195	0	1.1	5.6	34.89	Yes	No	NA	Class III
YIL047C	s	NA	SYG1	undetermined	NA	0	13.9	0	33.68	No	No	NA	Class III
YER073W	103	Alcohol/aldehydedehy,	ALD5	undetermined	0.303	4.8	12.1	15.7	30.75	Yes	No	NA	Class III
YMR056C	134	NA	AAC1	Localized	0.0243	6.2	9.3	0	30.52	No	No	NA	Class III
YNR016C	s	NA	ACC1	undetermined	0.283	6.1	1.6	1.5	27.85	Yes	No	NA	Class III
YOR317W	75	NA	FAA1	undetermined	0.253	1.6	0.9	0	26.92	Yes	No	NA	Class III
YJL130C	24	Glutaminefamilymet,	URA2	Not localized	0.0256	0	3	0	26.55	Yes	No	NA	Class III
YPL061W	103	Alcohol/aldehydedehy,	ALD6	undetermined	0.169	6.2	0	14.1	26.14	Yes	No	NA	Class III
YKL029C	37	Pyr,/?-ketoglutaratedehy,	MAE1	undetermined	0.215	0	15.1	4.8	26.04	Yes	No	NA	Class III
YKL120W	30	Mito,/cyt,lipidmet,	OAC1	undetermined	0.26	1.8	3.8	0	25.42	No	No	NA	Class III
YNL256W	46	Folateandglycinemet,	FOL1	undetermined	0.29	3.6	12.8	0	25.11	Yes	No	NA	Class III
YLR153C	103	Alcohol/aldehydedehy,	ACS2	undetermined	0.234	0	1.3	0	23.04	Yes	No	NA	Class III
YHR179W	153	NA	OYE2	Not localized	0.00444	0	1.8	7.9	21.8	Yes	No	NA	Class III
YLR089C	31	Glutamatesyn,	ALT1	undetermined	NA	1.5	18.8	0	21.25	Yes	No	NA	Class III
YMR189W	46	Folateandglycinemet,	GCV2	undetermined	0.0816	0	12.9	0	19.69	Yes	No	NA	Class III
YKL055C	127	NA	OAR1	Localized	0.0342	7.8	15.7	7.3	19.35	Yes	No	NA	Class III
YGR264C	146	NA	MES1	undetermined	0.215	0	1.1	0	18.1	Yes	No	NA	Class III
YCL009C	8	Branchedchainaasyn,	ILV6	undetermined	NA	3	31.1	16.1	17.22	Yes	No	NA	Class III
YEL006W	17	Unknown2	YEL006W	undetermined	NA	1.9	2	0	17.21	No	No	NA	Class III
YGR204W	46	Folateandglycinemet,	ADE3	undetermined	0.161	0	1.2	11.9	17.11	Yes	No	NA	Class III
YNL055C	93	NA	POR1	Not localized	0.000671	0	0	0	16.72	No	No	NA	Class III
YDR332W	116	NA	YDR332W	undetermined	0.147	6.4	7.5	0	15.92	Yes	No	NA	Class III
YIL114C	93	NA	POR2	undetermined	0.228	5.3	10.4	0.9	15.68	No	No	NA	Class III
YLR355C	8	Branchedchainaasyn,	ILV5	Not localized	0.0025	0	15.5	0	14.94	Yes	No	NA	Class III
YLL060C	128	NA	GTT2	Not localized	<10E-06	0	3.2	14.8	13.97	Yes	No	NA	Class III
YBR085W	134	NA	AAC3	undetermined	0.127	7.2	8	10.2	13.94	No	No	NA	Class III
YDR341C	84	NA	YDR341C	Not localized	0.000731	0	2.6	0.4	13.79	Yes	No	NA	Class III
YBR104W	s	NA	YMC2	undetermined	0.103	7.7	3.5	0.8	13.47	No	No	NA	Class III
YOL021C	131	NA	DIS3	undetermined	NA	1.5	2.6	0	13.32	Yes	No	NA	Class III
YOL098C	139	NA	YOL098C	Not localized	0.0342	0	4.1	0	12.95	Yes	No	NA	Class III
YJL026W	41	DNAreplication	RNR2	Not localized	0.00174	0	0	8.6	12.33	Yes	No	NA	Class III
YDL171C	31	Glutamatesyn,	GLT1	Not localized	0.000671	0	3.1	0	12.31	Yes	No	NA	Class III
YER070W	41	DNAreplication	RNR1	Not localized	<10E-06	0	0.2	0	11.93	Yes	No	NA	Class III
YKL212W	34	NA	SAC1	Not localized	0.019	0	5	0	11.82	No	No	NA	Class III
YGL256W	103	Alcohol/aldehydedehy,	ADH4	undetermined	0.0746	0	6.3	4.9	11.67	Yes	No	NA	Class III
YCR053W	66	aamet,	THR4	Not localized	0.01	0	2.3	1.2	11.34	Yes	No	NA	Class III
YMR110C	s	NA	YMR110C	undetermined	0.201	0.5	2.3	0	11.15	Yes	No	NA	Class III
YNL313C	19	NA	YNL313C	undetermined	0.247	0	2.6	0	11.1	Yes	No	NA	Class III
YLR216C	150	NA	CPR6	Not localized	0.000476	0	0	0	10.9	Yes	No	NA	Class III
YGL085W	s	NA	YGL085W	undetermined	NA	2.6	6.5	4.6	10.63	Yes	No	NA	Class III
YNL003C	113	NA	PET8	Not localized	0.0243	0	4.6	0	10.43	No	No	NA	Class III
YOR241W	145	NA	MET7	undetermined	0.0746	0	4.3	0	10.31	Yes	No	NA	Class III
YMR035W	152	NA	IMP2	undetermined	0.266	6.5	0.6	14.2	10.29	Yes	No	NA	Class III
YOR271C	s	NA	YOR271C	Not localized	0.0051	0	5.3	0	9.81	No	No	NA	Class III
YKL085W	95	NADmet,/TCAcycle	MDH1	undetermined	0.278	0.1	36.7	0	9.78	Yes	No	NA	Class III
YPR058W	s	NA	YMC1	Not localized	0.00746	0	1.8	19.1	9.71	No	No	NA	Class III
YPL023C	46	Folateandglycinemet,	MET12	undetermined	0.0953	6.9	2.2	14.1	9.45	Yes	No	NA	Class III
YKL132C	145	NA	RMA1	undetermined	0.176	6.8	2.3	5.2	9.29	Yes	No	NA	Class III
YBR177C	75	NA	EHT1	Not localized	0.0111	0	1	0	9.08	Yes	No	NA	Class III
YFL001W	65	NA	DEG1	undetermined	0.296	5.3	4.2	0	9.02	Yes	No	NA	Class III
YMR278W	s	NA	YMR278W	undetermined	0.247	0.1	1.9	0	8.95	Yes	No	NA	Class III
YIL078W	66	aamet,	THS1	undetermined	NA	0.7	0.8	4	8.94	Yes	No	NA	Class III
YLR027C	80	tRNAaminoacyl,	AAT2	Not localized	0.00579	0	0.2	18	8.69	Yes	No	NA	Class III
YDR214W	12	Fattyacidsyn,	AHA1	Not localized	0.00897	0	0	0	8.37	Yes	No	NA	Class III
YGR155W	66	aamet,	CYS4	Not localized	0.00697	0	0.7	6.4	8.03	Yes	No	NA	Class III
YLL027W	20	Iron-sulfurclusterasm	ISA1	undetermined	0.26	3	5.5	2	7.75	Yes	No	NA	Class III
YGL023C	s	NA	PIB2	undetermined	0.189	5.2	3	2.9	7.75	Yes	No	NA	Class III
YER178W	37	Pyr,/?-ketoglutaratedehy,	PDA1	Not localized	0.00108	0	32.1	8	7.73	Yes	No	NA	Class III
YMR083W	103	Alcohol/aldehydedehy,	ADH3	Not localized	0.0175	0	16.6	7.8	7.7	Yes	No	NA	Class III
YDR023W	66	aamet,	SES1	undetermined	0.0881	2.4	0	0	7.65	Yes	No	NA	Class III
YGR096W	s	NA	TPC1	undetermined	0.298	2.6	4.1	2.5	7.52	No	No	NA	Class III
YPL174C	s	NA	NIP100	undetermined	0.241	4.8	4.7	2	7.47	Yes	No	NA	Class III
YER096W	s	NA	SHC1	undetermined	0.154	0	0.9	35.3	7.31	Yes	No	NA	Class III
YGL057C	s	NA	YGL057C	Localized	0.019	7.5	21.8	0	7.23	No	No	NA	Class III
YBL098W	s	NA	BNA4	Not localized	0.00339	0	0.5	3	6.76	Yes	No	NA	Class III
YLR125W	17	Unknown2	YLR125W	undetermined	0.3	0.8	1.8	5.4	6.62	No	No	NA	Class III
YOL043C	136	NA	NTG2	undetermined	NA	0.5	3.5	4.1	6.4	Yes	No	NA	Class III
YHR031C	112	NA	RRM3	undetermined	0.303	1	3.3	13.7	6.13	Yes	No	NA	Class III
YPL009C	s	NA	YPL009C	undetermined	0.0953	0	3.4	0	6.1	Yes	No	NA	Class III
YML008C	75	NA	ERG6	Not localized	<10E-06	0	1.8	0	6.05	Yes	No	NA	Class III
YJR003C	s	NA	YJR003C	undetermined	0.293	0.1	8.9	0	5.88	No	No	NA	Class III
YOL025W	s	NA	LAG2	Not localized	0.0147	0	1	0.4	5.87	No	No	NA	Class III
YFL027C	89	NA	GYP8	undetermined	0.298	1.4	1.5	0	5.57	No	No	NA	Class III
YBL064C	37	Pyr,/?-ketoglutaratedehy,	PRX1	Not localized	0.0164	0	20.2	0	5.52	Yes	No	NA	Class III
YMR186W	150	NA	HSC82	Not localized	<10E-06	0	0	0	5.49	Yes	No	NA	Class III
YKL106W	80	tRNAaminoacyl,	AAT1	Not localized	0.000303	0	6.8	5	5.47	Yes	No	NA	Class III
YPR033C	108	NA	HTS1	Not localized	0.00561	0	2.8	0	5.4	Yes	No	NA	Class III
YAL011W	s	NA	SWC3	Not localized	0.0198	0	3.7	0	4.91	Yes	No	NA	Class III
YGR180C	41	DNAreplication	RNR4	Not localized	0.00402	0	0.5	7.8	4.26	Yes	No	NA	Class III
YDL059C	142	NA	RAD59	undetermined	0.161	5.6	3.6	4.7	4.2	Yes	No	NA	Class III
YGL240W	s	NA	DOC1	undetermined	0.0816	0	4	0	4.19	Yes	No	NA	Class III
YLR132C	s	NA	YLR132C	undetermined	0.0613	0	3.9	0	4.16	No	No	NA	Class III
YLR189C	79	MRPL	ATG26	undetermined	0.26	0	2.9	9.2	4.13	Yes	No	NA	Class III
YML007C-A	s	NA	YML007C-A	undetermined	NA	0	1.6	9.6	4	No	No	NA	Class III
YOR040W	21	NA	GLO4	Not localized	0.0111	0	6.9	7.5	3.96	Yes	No	NA	Class III
YBL039C	24	Glutaminefamilymet,	URA7	Not localized	0.0111	0	1.2	2.9	3.81	Yes	No	NA	Class III
YMR060C	49	TOMcomplex	SAM37	undetermined	0.26	4.8	1	2.9	3.66	Yes	No	NA	Class III
YOR221C	127	NA	MCT1	Not localized	0.0385	0	9.5	1.8	3.53	Yes	No	NA	Class III
YGR178C	16	Tim23/Tim22complex	PBP1	undetermined	0.303	4	1.9	8.6	3.3	No	No	NA	Class III
YGR193C	37	Pyr,/?-ketoglutaratedehy,	PDX1	undetermined	NA	3.8	18.6	3.5	3.13	Yes	No	NA	Class III
YOR226C	20	Iron-sulfurclusterasm	ISU2	Not localized	0.00811	0	2.3	0	2.98	Yes	No	NA	Class III
YJR136C	s	NA	YJR136C	undetermined	0.147	0	2.7	0.8	2.73	No	No	NA	Class III
YAL062W	31	Glutamatesyn,	GDH3	Not localized	<10E-06	0	2.1	5	2.58	Yes	No	NA	Class III
YER168C	s	NA	CCA1	undetermined	0.176	0	3	0	2.57	Yes	No	NA	Class III
YGL211W	s	NA	NCS6	Not localized	0.0175	0	3	0	2.33	Yes	No	NA	Class III
YPL159C	s	NA	PET20	undetermined	NA	1.8	17.4	0	2.08	No	No	NA	Class III
YGR015C	s	NA	YGR015C	undetermined	0.0613	0	1.1	0.7	2.07	Yes	No	NA	Class III
YOL115W	99	MRPS	TRF4	undetermined	0.26	1.8	1.4	0	1.99	No	No	NA	Class III
YLR059C	83	NA	REX2	undetermined	0.14	0	5.6	0	1.85	Yes	No	NA	Class III
YNL312W	35	ResponsetoDNAdamage	RFA2	Not localized	<10E-06	0	0.4	8.5	1.79	No	No	NA	Class III
YJL045W	147	RCC-II	YJL045W	Not localized	0.000957	0	20.2	2.8	1.77	Yes	No	NA	Class III
YEL024W	156	RCC-III	RIP1	Not localized	0.0505	0	16.6	0	1.77	Yes	No	NA	Class III
YCL056C	77	NA	YCL056C	undetermined	0.234	0	4	3.3	1.69	No	No	NA	Class III
YPR191W	156	RCC-III	QCR2	Not localized	0.00746	0	16.5	0	1.69	Yes	No	NA	Class III
YLR060W	80	tRNAaminoacyl,	FRS1	Not localized	0.000412	0	0	0	1.5	Yes	No	NA	Class III
YDR478W	83	NA	SNM1	undetermined	NA	0	1.1	0	1.35	No	No	NA	Class III
YOR251C	59	NA	YOR251C	Not localized	<10E-06	0	4.4	0	1.33	Yes	No	NA	Class III
YJR104C	81	NA	SOD1	Not localized	0.0108	0	0	24.9	1.26	Yes	No	NA	Class III
YKL114C	136	NA	APN1	undetermined	0.221	5	10.7	0	1.25	Yes	No	NA	Class III
YDR499W	35	ResponsetoDNAdamage	LCD1	Not localized	0.0164	0	2.2	1.9	1.18	No	No	NA	Class III
YDR195W	159	NA	REF2	Not localized	0.0283	0	0	3.7	1.11	No	No	NA	Class III
YDR361C	139	NA	BCP1	undetermined	0.103	0	0.4	6.7	1.07	No	No	NA	Class III
YLR281C	27	Unknown1	YLR281C	Not localized	0.00108	0	10.6	0	1.03	Yes	No	NA	Class III
YEL047C	s	NA	YEL047C	Not localized	<10E-06	0	0	1.8	1	Yes	No	NA	Class III
YKL162C	101	NA	YKL162C	undetermined	NA	0	4.2	1.2	0.96	Yes	No	NA	Class III
YJR062C	s	NA	NTA1	undetermined	0.169	0.3	4.5	3.8	0.83	Yes	No	NA	Class III
YBR136W	35	ResponsetoDNAdamage	MEC1	Not localized	0.00444	0	1.4	0	0.54	No	No	NA	Class III
YLR165C	s	NA	PUS5	Not localized	0.0175	0	3	0.7	0.38	Yes	No	NA	Class III
YDL168W	103	Alcohol/aldehydedehy,	SFA1	Not localized	0.0025	0	0.8	0	0	Yes	No	NA	Class III
YOL086C	103	Alcohol/aldehydedehy,	ADH1	Not localized	<10E-06	0	0	0	0	Yes	No	NA	Class III
YDR226W	41	DNAreplication	ADK1	Not localized	<10E-06	0	0	0	0	Yes	No	NA	Class III
YER183C	46	Folateandglycinemet,	FAU1	Not localized	<10E-06	0	1.5	0	0	Yes	No	NA	Class III
YIL065C	64	Fusion/fission	FIS1	undetermined	0.26	1.2	1	4.6	0	Yes	No	NA	Class III
YBR291C	24	Glutaminefamilymet,	CTP1	Not localized	<10E-06	0	1	0	0	No	No	NA	Class III
YOR303W	24	Glutaminefamilymet,	CPA1	Not localized	<10E-06	0	0	0	0	Yes	No	NA	Class III
YDL022W	48	Glycerolmet,	GPD1	Not localized	<10E-06	0	0	0	0	Yes	No	NA	Class III
YPL206C	48	Glycerolmet,	YPL206C	Not localized	<10E-06	0	0.9	0	0	Yes	No	NA	Class III
YDL120W	20	Iron-sulfurclusterasm	YFH1	undetermined	0.067	0	0.8	0	0	Yes	No	NA	Class III
YGR046W	15	Matrixproteinimport	YGR046W	Not localized	0.00897	0	10.3	0	0	Yes	No	NA	Class III
YIL124W	30	Mito,/cyt,lipidmet,	AYR1	Not localized	<10E-06	0	0	0	0	Yes	No	NA	Class III
YOL009C	6	Mito,org,andmorph,	MDM12	Not localized	<10E-06	0	0.5	1.2	0	No	No	NA	Class III
YFR049W	99	MRPS	YMR31	Not localized	<10E-06	0	2.5	0	0	No	No	NA	Class III
YHR075C	99	MRPS	PPE1	Not localized	0.00265	0	1.3	1.7	0	Yes	No	NA	Class III
YNL186W	99	MRPS	UBP10	Not localized	<10E-06	0	1.7	0	0	No	No	NA	Class III
YJR085C	5	NA	YJR085C	Not localized	<10E-06	0	2.1	1.4	0	Yes	No	NA	Class III
YER057C	13	NA	HMF1	Not localized	<10E-06	0	0	0	0	Yes	No	NA	Class III
YIL051C	13	NA	MMF1	Not localized	<10E-06	0	0	0	0	Yes	No	NA	Class III
YMR072W	13	NA	ABF2	Not localized	<10E-06	0	1.9	8.5	0	No	No	NA	Class III
YDR512C	18	NA	EMI1	Not localized	<10E-06	0	0.6	0	0	No	No	NA	Class III
YDR272W	21	NA	GLO2	Not localized	<10E-06	0	0.2	1	0	Yes	No	NA	Class III
YGR192C	21	NA	TDH3	Not localized	0.000302	0	0	0	0	Yes	No	NA	Class III
YFL030W	26	NA	AGX1	Not localized	0.000156	0	1.5	0	0	Yes	No	NA	Class III
YKL190W	34	NA	CNB1	Not localized	<10E-06	0	3	0	0	No	No	NA	Class III
YPL069C	34	NA	BTS1	Not localized	0.00897	0	0.3	0	0	Yes	No	NA	Class III
YLR351C	40	NA	NIT3	Not localized	0.000293	0	7.1	3.7	0	Yes	No	NA	Class III
YML078W	43	NA	CPR3	Not localized	<10E-06	0	4.9	0	0	Yes	No	NA	Class III
YAL046C	55	NA	YAL046C	Not localized	<10E-06	0	0	0	0	Yes	No	NA	Class III
YDR044W	56	NA	HEM13	Not localized	<10E-06	0	0	0	0	Yes	No	NA	Class III
YBR269C	63	NA	FMP21	Not localized	<10E-06	0	1.1	4.6	0	Yes	No	NA	Class III
YGR144W	74	NA	THI4	Not localized	<10E-06	0	0.3	0	0	Yes	No	NA	Class III
YJL161W	76	NA	FMP33	Not localized	<10E-06	0	0	0	0	No	No	NA	Class III
YHR008C	81	NA	SOD2	Not localized	0.000158	0	10.6	0	0	Yes	No	NA	Class III
YOR285W	91	NA	YOR285W	Not localized	<10E-06	0	0.8	8	0	Yes	No	NA	Class III
YPR183W	91	NA	DPM1	Not localized	<10E-06	0	1.2	2.7	0	Yes	No	NA	Class III
YJR095W	104	NA	SFC1	undetermined	0.169	0	9.6	92.1	0	No	No	NA	Class III
YBR034C	108	NA	HMT1	Not localized	<10E-06	0	0	0	0	Yes	No	NA	Class III
YLR368W	114	NA	MDM30	undetermined	0.109	0	0.1	0	0	No	No	NA	Class III
YOL095C	116	NA	HMI1	Not localized	0.0124	0	1.2	0	0	Yes	No	NA	Class III
YDL130W-A	120	NA	STF1	Not localized	<10E-06	0	0.4	4.4	0	No	No	NA	Class III
YGR008C	120	NA	STF2	Not localized	0.00201	0	0	17.4	0	No	No	NA	Class III
YDR513W	128	NA	TTR1	Not localized	0.0039	0	2.3	1.2	0	Yes	No	NA	Class III
YIR038C	128	NA	GTT1	Not localized	<10E-06	0	0.9	6.4	0	Yes	No	NA	Class III
YDR305C	135	NA	HNT2	Not localized	0.00579	0	3.1	0	0	Yes	No	NA	Class III
YML060W	136	NA	OGG1	Not localized	<10E-06	0	0.7	0	0	Yes	No	NA	Class III
YEL059C-A	137	NA	SOM1	Not localized	<10E-06	0	0	0	0	No	No	NA	Class III
YPL208W	139	NA	YPL208W	Not localized	<10E-06	0	0.5	0	0	No	No	NA	Class III
YBL059W	141	NA	YBL059W	undetermined	0.0549	0	1.4	0	0	No	No	NA	Class III
YLR285W	144	NA	NNT1	Not localized	0.0051	0	0.9	4.1	0	Yes	No	NA	Class III
YMR150C	152	NA	IMP1	undetermined	0.0953	0	9.4	0	0	Yes	No	NA	Class III
YBL087C	s	NA	RPL23A	undetermined	0.127	0	0	0	0	Yes	No	NA	Class III
YBL095W	s	NA	YBL095W	Not localized	0.00372	0	1.8	0	0	Yes	No	NA	Class III
YBR063C	s	NA	YBR063C	Not localized	0.00697	0	0	0	0	No	No	NA	Class III
YBR111C	s	NA	YSA1	Not localized	0.00358	0	0.7	0	0	Yes	No	NA	Class III
YBR230C	s	NA	YBR230C	Not localized	<10E-06	0	0.7	11.8	0	No	No	NA	Class III
YDL230W	s	NA	PTP1	Not localized	0.0307	0	2.2	1.4	0	No	No	NA	Class III
YDR070C	s	NA	FMP16	Not localized	<10E-06	0	0	0	0	No	No	NA	Class III
YER004W	s	NA	FMP52	Not localized	<10E-06	0	0.9	0	0	Yes	No	NA	Class III
YER048W-A	s	NA	YER048W-A	Not localized	0.00746	0	0.4	4.3	0	No	No	NA	Class III
YFL046W	s	NA	FMP32	undetermined	0.147	0	8.7	0	0	Yes	No	NA	Class III
YGL221C	s	NA	NIF3	Not localized	0.019	0	3.8	0	0	Yes	No	NA	Class III
YGR235C	s	NA	YGR235C	undetermined	0.253	0	1	0.6	0	No	No	NA	Class III
YHR100C	s	NA	YHR100C	Not localized	<10E-06	0	0	0	0	Yes	No	NA	Class III
YIL087C	s	NA	YIL087C	Not localized	<10E-06	0	0	0	0	No	No	NA	Class III
YKR049C	s	NA	FMP46	Not localized	<10E-06	0	0.4	11.5	0	No	No	NA	Class III
YLL018C-A	s	NA	COX19	Not localized	0.0223	0	0.5	5.3	0	No	No	NA	Class III
YLR043C	s	NA	TRX1	Not localized	<10E-06	0	0	0.4	0	Yes	No	NA	Class III
YLR270W	s	NA	DCS1	Not localized	<10E-06	0	0	0	0	Yes	No	NA	Class III
YMR152W	s	NA	YIM1	undetermined	0.0746	0	1	3.4	0	Yes	No	NA	Class III
YNL111C	s	NA	CYB5	Not localized	<10E-06	0	0	0	0	No	No	NA	Class III
YNL200C	s	NA	YNL200C	Not localized	<10E-06	0	0	0	0	Yes	No	NA	Class III
YNL211C	s	NA	YNL211C	Not localized	0.0154	0	0	0	0	No	No	NA	Class III
YNR018W	s	NA	YNR018W	Not localized	<10E-06	0	3.6	0	0	No	No	NA	Class III
YOL109W	s	NA	ZEO1	Not localized	<10E-06	0	0	9.6	0	Yes	No	NA	Class III
YOR059C	s	NA	YOR059C	Not localized	0.0051	0	4.1	0	0	Yes	No	NA	Class III
YOR215C	s	NA	YOR215C	Not localized	0.0243	0	7	0	0	Yes	No	NA	Class III
YOR216C	s	NA	RUD3	Not localized	0.0108	0	1.6	0	0	Yes	No	NA	Class III
YOR305W	s	NA	YOR305W	undetermined	0.241	0	0.7	0	0	No	No	NA	Class III
YPL107W	s	NA	YPL107W	Not localized	0.0147	0	7.3	0	0	Yes	No	NA	Class III
YPL108W	s	NA	YPL108W	Not localized	0.0428	0	2	3.2	0	No	No	NA	Class III
YPL148C	s	NA	PPT2	Not localized	0.000303	0	0	0	0	Yes	No	NA	Class III
YDR178W	147	RCC-II	SDH4	Not localized	0.00157	0	5.2	1.7	0	Yes	No	NA	Class III
YLR164W	147	RCC-II	YLR164W	Not localized	0.00811	0	0.1	7.3	0	No	No	NA	Class III
YMR118C	147	RCC-II	YMR118C	Not localized	<10E-06	0	4.8	0	0	Yes	No	NA	Class III
YDR529C	156	RCC-III	QCR7	Not localized	0.0243	0	0	2.7	0	No	No	NA	Class III
YFR033C	156	RCC-III	QCR6	undetermined	NA	0	0.8	4.4	0	No	No	NA	Class III
YGR183C	156	RCC-III	QCR9	Not localized	0.000158	0	0	2.1	0	No	No	NA	Class III
YHR001W-A	156	RCC-III	QCR10	Not localized	<10E-06	0	0	0	0	No	No	NA	Class III
YJL166W	156	RCC-III	QCR8	Not localized	0.00149	0	0	1.2	0	No	No	NA	Class III
YDL067C	1	RCC-IV	COX9	Not localized	0.000424	0	0	4.9	0	No	No	NA	Class III
YEL039C	1	RCC-IV	CYC7	Not localized	<10E-06	0	0	0	0	Yes	No	NA	Class III
YGL187C	1	RCC-IV	COX4	Not localized	0.000957	0	0	0	0	No	No	NA	Class III
YGL191W	1	RCC-IV	COX13	Not localized	<10E-06	0	0	0	0	No	No	NA	Class III
YHR051W	1	RCC-IV	COX6	Not localized	<10E-06	0	0	0	0	No	No	NA	Class III
YIL111W	1	RCC-IV	COX5B	Not localized	<10E-06	0	0	0	0	No	No	NA	Class III
YLR038C	1	RCC-IV	COX12	Not localized	<10E-06	0	0	0.4	0	No	No	NA	Class III
YMR256C	1	RCC-IV	COX7	Not localized	<10E-06	0	0	0	0	No	No	NA	Class III
YNL052W	1	RCC-IV	COX5A	Not localized	<10E-06	0	0.5	0	0	No	No	NA	Class III
YDL004W	155	RCC-V	ATP16	Not localized	<10E-06	0	0.7	1.1	0	Yes	No	NA	Class III
YDL181W	155	RCC-V	INH1	Not localized	0.000296	0	0	0	0	No	No	NA	Class III
YDR298C	155	RCC-V	ATP5	Not localized	<10E-06	0	11.8	2.3	0	Yes	No	NA	Class III
YDR377W	155	RCC-V	ATP17	Not localized	<10E-06	0	0	0	0	No	No	NA	Class III
YKL016C	155	RCC-V	ATP7	Not localized	0.000298	0	0	4.5	0	No	No	NA	Class III
YLR295C	155	RCC-V	ATP14	Not localized	0.0039	0	0	3.3	0	No	No	NA	Class III
YPL271W	155	RCC-V	ATP15	Not localized	<10E-06	0	0	8.2	0	No	No	NA	Class III
YPR020W	155	RCC-V	ATP20	Not localized	<10E-06	0	0	0	0	No	No	NA	Class III
YMR234W	35	ResponsetoDNAdamage	RNH1	Not localized	0.0141	0	2.7	0	0	Yes	No	NA	Class III
YHR083W	49	TOMcomplex	SAM35	Not localized	0.00113	0	2.3	3.2	0	No	No	NA	Class III
YDL069C	62	Translat,regulatoractivity	CBS1	Not localized	0.00281	0	5.3	0	0	No	No	NA	Class III
YER153C	62	Translat,regulatoractivity	PET122	Not localized	<10E-06	0	7.7	0	0	No	No	NA	Class III
YGR222W	62	Translat,regulatoractivity	PET54	undetermined	0.195	0	9.2	0	0	No	No	NA	Class III
YFL022C	80	tRNAaminoacyl,	FRS2	Not localized	<10E-06	0	0.7	0	0	Yes	No	NA	Class III
YLR290C	27	Unknown1	YLR290C	Not localized	0.00223	0	8.2	3.4	0	Yes	No	NA	Class III
YNL133C	27	Unknown1	FYV6	Not localized	<10E-06	0	0.5	0	0	No	No	NA	Class III
YPR061C	27	Unknown1	JID1	Not localized	<10E-06	0	6.4	0	0	Yes	No	NA	Class III

## Sheet:  Class IV Mitochondrial encoded
SYSTEMATIC NAME	Module Number	Module name	Standard Name	SAM analysis	SAM q value	MLR (%localisation)	MLR + cycloheximide (%)	MLR + puromycin (%)	MLR Dpuf3 (%)	Procaryotic homologue	Puf3p binding site	Puf3p target	MLR Classification
Q0045	1	RCC-IV	COX1	Localized	<10E-06	100	100	100	100	Yes	No	NA	Class IV
Q0250	1	RCC-IV	COX2	Localized	<10E-06	100	100	100	100	Yes	No	NA	Class IV
Q0275	1	RCC-IV	COX3	Localized	<10E-06	100	100	100	100	Yes	No	NA	Class IV
Q0080	155	RCC-V	ATP8	Localized	<10E-06	100	100	100	100	Yes	No	NA	Class IV
Q0130	155	RCC-V	OLI1	Localized	<10E-06	100	100	100	100	Yes	No	NA	Class IV
Q0085	155	RCC-V	ATP6	undetermined	0.283	0	2.1	1.5	0	Yes	No	NA	Class IV
Q0105	156	RCC-III	COB	Localized	<10E-06	100	100	100	100	Yes	No	NA	Class IV
Q0140	s	NA	VAR1	Localized	<10E-06	100	100	100	100	Yes	No	NA	Class IV
