# Supplementary material for: Yeast Mitochondrial Biogenesis: A Role for the PUF RNA-Binding Protein Puf3p in mRNA Localization
Source: PLoS One. 2008 Jun 4;3(6):e2293. doi: 10.1371/journal.pone.0002293 (PMC2387061; doi:10.1371/journal.pone.0002293)
Supplement: Table S2 — RT-PCR analyses of mRNA localization. RT-PCR analyses were conducted as indicated in Garcia M, Darzacq X, Devaux F, Singer R, Jacq C (2007); Biology MiM, editor. Totowa, New Jersey: Humana Press. 505–528 p. (0.02 MB XLS) [file pone.0002293.s009.xls]

## Sheet: Feuil1
Gene	MLR RT-PCR (%)	MLR microarray (%)	MLR +cycloheximide RT-PCR (%)	MLR +cycloheximide microarray (%)	MLR +puromycin RT-PCR (%)	MLR +puromycin microarray (%)	MLR Dpuf3 RT-PCR (%)	MLR Dpuf3 microarray (%)
ACO1	47+/- 0	56.9	41 +/- 1,4	61.3	6,5 +/- 3,5	6.6	ND	91.7
ATP2	30+/-0	44.7	37+/- 7,1	67.1	1 +/- 0	0.5	23,5 +/- 0,7	79.3
ATP3	51,9 +/- 11,3	87.9	40 +/- 1,4	48.3	1,5 +/- 2,1	4.2	ND	77.7
ATP11	ND	42.7	4 +/- 2,1	8.2	ND	9.5	ND	20.5
ATP16	6,5 +/- 4,2	0	1 +/- 0,7	0.7	1 +/- 1,4	1.1	ND	0
BCS1	37 +/- 25,4	30.9	5,5 +/- 3,5	7.8	ND	7.3	0,5 +/- 0,7	5.5
CBP2	59,5 +/- 29	77.1	27 +/- 17,6	31	ND	11.7	ND	87.76
CBP6	ND	41.4	2 +/- 1,4	0.4	ND	0	ND	0
CBS2	51 +/- 8,5	51.5	4 +/- 2,8	14	ND	0	ND	37
COR1	ND	12.6	26 +/- 7,1	31.5	ND	4.1	ND	7.5
COX17	27 +/-4,2	30.9	0	0	ND	5.3	0	0
COX23	ND	37.7	ND	4.3	ND	27.8	0	1.8
CYT1	41,5 +/- 7,6	81.8	13 +/- 3,5	29.2	3 +/- 4,2	3.1	ND	73.2
CYT2	16,6 +/- 9,45	9.4	1 +/1 0,7	1.8	2 +/- 1,4	2.1	ND	0
QCR8	6 +/- 1,4	0	ND	0	ND	1.2	ND	0
TIM50	ND	100	ND	31.6	10,5 +/- 3,5	13.1	ND	100
YAH1	ND	24.2	4 +/- 2,8	1.5	ND	7.5	1 +/- 1,4	0
