# Supplementary material for: Yeast Mitochondrial Biogenesis: A Role for the PUF RNA-Binding Protein Puf3p in mRNA Localization
Source: PLoS One. 2008 Jun 4;3(6):e2293. doi: 10.1371/journal.pone.0002293 (PMC2387061; doi:10.1371/journal.pone.0002293)
Supplement: Table S4 — List of the genes coding for cytosolic non-mitochondrial proteins (according to YPD) which were used as a negative control set (0.07 MB XLS) [file pone.0002293.s011.xls]

## Sheet: Feuil1
ORF	Name	Description
YBR159W		MICROSOMAL BETA-KETO-REDUCTASE
YCR017C	CWH43
YPL241C	CIN2	TUBULIN FOLDING COFACTOR C
YER131W	RPS26B	RIBOSOMAL PROTEIN S26B
YML031W	NDC1	MULTIPLE TRANSMEMBRANE DOMAINS (PUTATIVE)|NUCLEAR ENVELOPE PROTEIN|NUCLEAR PORE COMPLEX SUBUNIT
YDL015C	TSC13	ER PROTEIN INVOLVED IN VERY LONG CHAIN FATTY ACID SYNTHESIS
YML104C	MDM1	INTERMEDIATE FILAMENT PROTEIN
YLL006W	MMM1	MITOCHONDRIAL OUTER MEMBRANE PROTEIN
YLR342W	FKS1	1,3-BETA-D-GLUCAN SYNTHASE
YGR148C	RPL24B	RIBOSOMAL PROTEIN L24B (RP29) (YL21) (L30B)
YDL178W	DLD2	D-LACTATE DEHYDROGENASE, LOCATED IN THE MITOCHONDRIAL MATRIX
YNL094W	APP1	UNKNOWN
YDR171W	HSP42	SIMILAR TO HSP26 EXPRESSION IS REGULATED BY STRESS CONDITIONS
YLR029C	RPL15A	RIBOSOMAL PROTEIN L15A (YL10) (RP15R) (L13A)
YHL015W	RPS20	RIBOSOMAL PROTEIN S20
YHR195W	NVJ1	VAC8P BINDING PROTEIN NUCLEUS-VACUOLE JUNCTION
YBL072C	RPS8A	RIBOSOMAL PROTEIN S8A (S14A) (RP19) (YS9)
YPL155C	KIP2	KINESIN RELATED PROTEIN
YJL042W	MHP1	MICROTUBULE-ASSOCIATED PROTEIN (MAP) (PUTATIVE)
YDL075W	RPL31A	RIBOSOMAL PROTEIN L31A (L34A) (YL28)
YJL136C	RPS21B	RIBOSOMAL PROTEIN S21B (S26B) (YS25)
YML026C	RPS18B	RIBOSOMAL PROTEIN S18B
YPR102C	RPL11A	RIBOSOMAL PROTEIN L11A (L16A) (RP39A) (YL22)
YER102W	RPS8B	RIBOSOMAL PROTEIN S8B (S14B) (RP19) (YS9)
YGL031C	RPL24A	RIBOSOMAL PROTEIN L24A (RP29) (YL21) (L30A)
YLR406C	RPL31B	RIBOSOMAL PROTEIN L31B (L34B) (YL28)
YGL147C	RPL9A	RIBOSOMAL PROTEIN L9A (L8A) (RP24) (YL11)
YIL069C	RPS24B	RIBOSOMAL PROTEIN S24B
YPL249C-A	RPL36B	RIBOSOMAL PROTEIN L36B (L39) (YL39)
YJL019W	MPS3	NUCLEAR ENVELOPE PROTEIN|SPINDLE POLE BODY DUPLICATION
YGR085C	RPL11B	RIBOSOMAL PROTEIN L11B (L16B) (RP39B) (YL22)
YBL027W	RPL19B	RIBOSOMAL PROTEIN L19B (YL14) (L23B) (RPL5L)
YOR063W	RPL3	RIBOSOMAL PROTEIN L3 (RP1) (YL1)
YPL131W	RPL5	RIBOSOMAL PROTEIN L5 (L1A)(YL3)
YOL040C	RPS15	RIBOSOMAL PROTEIN S15 (S21) (RP52) (RIG PROTEIN)
YDR532C		HYPOTHETICAL ORF
YPL255W	BBP1	INVOLVED IN MITOTIC CELL CYCLE AND MEIOSIS
YLR259C	HSP60	CHAPERONIN|GROEL HOMOLOG
YDR273W	DON1	MEIOSIS-SPECIFIC COMPONENT OF THE SPINDLE POLE BODY, PART OF THE LEADING EDGE PROTEIN (LEP) COAT, FORMS A RING-LIKE STRUCTURE AT THE LEADING EDGE OF THE PROSPORE MEMBRANE DURING MEIOSIS II
YBL031W	SHE1	PRODUCT OF GENE UNKNOWN
YMR142C	RPL13B	RIBOSOMAL PROTEIN L13B
YMR032W	HOF1	SH3 DOMAIN CONTAINING-PROTEIN REQUIRED FOR CYTOKINESIS
YLR045C	STU2	CONTROL OF MICROTUBULE DYNAMICS BY STU2P IS ESSENTIAL FOR SPINDLE ORIENTATION AND METAPHASE CHROMOSOME ALIGNMENT.
YCL014W	BUD3	PROTEIN INVOLVED IN BUD-SITE SELECTION AND REQUIRED FOR AXIAL BUDDING PATTERN LOCALIZES WITH SEPTINS TO BUD NECK IN MITOSIS AND MAY CONSTITUTE --AXIAL LANDMARK-- FOR NEXT ROUND OF BUDDING
YLR388W	RPS29A	RIBOSOMAL PROTEIN S29A (S36A) (YS29)
YNL188W	KAR1	INVOLVED IN SPINDLE POLE BODY DUPLICATION AND KARYOGAMY, INTERACTS WITH CDC31P, LOCALIZES TO THE SPINDLE POLE BODY
YIL149C	MLP2	COILED-COIL PROTEIN (PUTATIVE), SIMILAR TO MYOSIN AND TPR
YMR198W	CIK1	KAR3-BINDING PROTEIN
YBL047C	EDE1	EH DOMAIN PROTEIN INVOLVED IN ENDOCYTOSIS
YHR158C	KEL1	PROTEIN CONTAINS SIX KELCH REPEATS, CONTAINS LEUCINE ZIPPER PATTERNS, SIMILAR TO KEL2 AND KEL3. KEL1P HAS BEEN PROPOSED TO FUNCTION AS AN ANTAGONIST OF THE PKC1P PATHWAY.
YNL271C	BNI1	FORMIN, INVOLVED IN SPINDLE ORIENTATION
YGL123W	RPS2	RIBOSOMAL PROTEIN S2 (S4) (RP12) (YS5)
YLR397C	AFG2	SIMILAR TO THE CDC48 GENE PRODUCT
YDR129C	SAC6	ACTIN FILAMENT BUNDLING PROTEIN|FIMBRIN HOMOLOG
YOL120C	RPL18A	RIBOSOMAL PROTEIN L18A (RP28A)
YHR161C	YAP1801	YEAST ASSEMBLY POLYPEPTIDE, MEMBER OF AP180 PROTEIN FAMILY, BINDS PAN1P AND CLATHRIN
YOR369C	RPS12	RIBOSOMAL PROTEIN S12
YBR133C	HSL7	HAS HOMOLOGY TO ARGININE METHYLTRANSFERASES
YOL091W	SPO21	COMPONENT OF THE MEIOTIC OUTER PLAQUE, A MEMBRANE-ORGANIZING CENTER THAT ASSEMBLES ON THE CYTOPLASMIC FACE OF THE SPINDLE POLE BODY DURING MEIOSIS II AND TRIGGERS THE FORMATION OF THE PROSPORE MEMBRANE
YBR046C	ZTA1	ZETA-CRYSTALLIN HOMOLOG, HAS SIMILARITY TO E. COLI QUINONE OXIDOREDUCTASE AND HUMAN ZETA-CRYSTALLIN WHICH HAS QUINONE OXIDOREDUCTASE ACTIVITY
YOL069W	NUF2	53 KDA COILED-COIL PROTEIN
YEL003W	GIM4	BOVINE PREFOLDIN SUBUNIT 2 HOMOLOG (PUTATIVE)
YLR314C	CDC3	COMPONENT OF THE SEPTIN RING OF THE MOTHER-BUD NECK THAT IS REQUIRED FOR CYTOKINESIS SEPTINS RECRUIT PROTEINS TO THE NECK AND CAN ACT AS A BARRIER TO DIFFUSION AT THE MEMBRANE, AND THEY COMPRISE THE 10NM FILAMENTS SEEN WITH EM
YOR257W	CDC31	NUCLEAR PORE COMPLEX SUBUNIT|SPINDLE POLE BODY CALCIUM-BINDING PROTEIN COMPONENT
YOR293W	RPS10A	RIBOSOMAL PROTEIN S10A
YGR238C	KEL2	PROTEIN CONTAINING SIX KELCH REPEATS SUSPECTED OF MEDIATING BINDING INTERACTIONS WITH ACTIN SIMILAR TO KEL1 AND KEL3.
YKL129C	MYO3	MYOSIN I
YDL083C	RPS16B	RIBOSOMAL PROTEIN S16B (RP61R)
YNL302C	RPS19B	RIBOSOMAL PROTEIN S19B (RP55B) (S16AB) (YS16B)
YMR065W	KAR5	COILED-COIL MEMBRANE PROTEIN
YDL061C	RPS29B	RIBOSOMAL PROTEIN S29B (S36B) (YS29)
YBL007C	SLA1	CYTOSKELETAL PROTEIN BINDING PROTEIN
YBR048W	RPS11B	RIBOSOMAL PROTEIN S11B (S18B) (RP41B) (YS12)
YLL001W	DNM1	SIMILAR TO DYNAMIN GTPASE
YPL018W	CTF19	KINETOCHORE PROTEIN
YNL233W	BNI4	REQUIRED TO LINK CHS3P AND CHS4P TO THE SEPTINS
YBR191W	RPL21A	RIBOSOMAL PROTEIN L21A
YLL045C	RPL8B	RIBOSOMAL PROTEIN L8B (L4B) (RP6) (YL5)
YLR367W	RPS22B	RIBOSOMAL PROTEIN S22B (S24B) (RP50) (YS22)
YOL116W	MSN1	43 KDA PROTEIN|TRANSCRIPTIONAL ACTIVATOR
YPR119W	CLB2	B-TYPE CYCLIN
YKL021C	MAK11	ESSENTIAL FOR CELL GROWTH AND REPLICATION OF M DSRNA VIRUS CONTAINS FOUR BETA-TRANSDUCIN REPEATS
YNL178W	RPS3	RIBOSOMAL PROTEIN S3 (RP13) (YS3)
YPL124W	SPC29	SPINDLE POLE BODY COMPONENT
YDR016C	DAD1	DUO1 AND DAM1 INTERACTING LOCALIZED TO INTRANUCLEAR SPINDLES AND SPINDLE POLE BODIES
YNL020C	ARK1	SERINE-THREONINE KINASE (PUTATIVE)
YLR206W	ENT2	EPSIN-LIKE PROTEIN REQUIRED FOR ENDOCYTOSIS AND ACTIN PATCH ASSEMBLY AND FUNCTIONALLY REDUNDANT WITH ENT1P CONTAINS CLATHRIN-BINDING MOTIF AT C-TERMINUS
YDR218C	SPR28	SEPTIN-RELATED PROTEIN EXPRESSED DURING SPORULATION
YLL021W	SPA2
YOR312C	RPL20B	RIBOSOMAL PROTEIN L20B (L18B)
YJL189W	RPL39	RIBOSOMAL PROTEIN L39 (L46) (YL40)
YMR143W	RPS16A	RIBOSOMAL PROTEIN S16A (RP61R)
YHR010W	RPL27A	RIBOSOMAL PROTEIN L27A
YPR043W	RPL43A	RIBOSOMAL PROTEIN L43A
YJL190C	RPS22A	RIBOSOMAL PROTEIN S22A (S24A) (RP50) (YS22)
YKL049C	CSE4	SIMILAR TO HISTONE H3 AND TO HUMAN CENTROMERE PROTEIN CENP-A
YLR319C	BUD6	ACTIN- AND FORMIN-INTERACTING PROTEIN, INVOLVED IN ACTIN CABLE NUCLEATION AND POLARIZED CELL GROWTH ISOLATED AS BIPOLAR BUDDING MUTANT
YMR294W	JNM1	COILED-COIL DOMAIN PROTEIN REQUIRED FOR PROPER NUCLEAR MIGRATION DURING MITOSIS (BUT NOT DURING CONJUGATION)
YGR041W	BUD9	PROTEIN INVOLVED IN BUD-SITE SELECTION DIPLOID MUTANTS DISPLAY A UNIPOLAR BUDDING PATTERN INSTEAD OF THE WILD-TYPE BIPOLAR PATTERN, AND BUD AT THE DISTAL POLE
YLR344W	RPL26A	RIBOSOMAL PROTEIN L26A (L33A) (YL33)
YPL143W	RPL33A	RIBOSOMAL PROTEIN L33A (L37A) (YL37) (RP47)
YDL133C-A	RPL41B	RIBOSOMAL PROTEIN L41B (YL41) (L47B)
YDR309C	GIC2	GTPASE-INTERACTING COMPONENT 2
YML024W	RPS17A	RIBOSOMAL PROTEIN S17A (RP51A)
YOR060C		PROTEIN REQUIRED FOR CELL VIABILITY
YKL180W	RPL17A	RIBOSOMAL PROTEIN L17A (L20A) (YL17)
YDL239C	ADY3	ACCUMULATION OF DYADS. MEDIATES ASSEMBLY OF THE DON1P-CONTAINING STRUCTURE AT THE LEADING EDGE OF THE PROSPORE MEMBRANE VIA INTERACTION WITH COMPONENTS OF THE SPINDLE POLE BODY.
YOR181W	LAS17	ACTIN ASSEMBLY FACTOR
YOL039W	RPP2A	60S ACIDIC RIBOSOMAL PROTEIN P2A (L44) (A2) (YP2ALPHA)
YKL092C	BUD2	GTPASE ACTIVATING PROTEIN (GAP) FOR RSR1P-BUD1P
YEL061C	CIN8	KINESIN MOTOR PROTEIN INVOLVED IN MITOTIC SPINDLE ASSEMBLY AND CHROMOSOME SEGREGATION
YBR079C	RPG1	TRANSLATION INITIATION FACTOR EIF3 SUBUNIT
YBR211C	AME1	MICROTUBULE STABILITY REGULATOR
YPL233W	NSL1	PROTEIN REQUIRED FOR CELL VIABILITY
YJL020C	BBC1	SHOWS SYNTHETIC FITNESS DEFECT WITH BNI1 MUTANTS AND ASSOCIATES WITH THE BEE1P-VRP1P-MYO3-5P COMPLEX
YML064C	TEM1	GTP-BINDING PROTEIN|RAS FAMILY
YMR001C	CDC5	PROTEIN KINASE
YER016W	BIM1	BIM1P AND KAR9P TOGETHER MAKE UP THE CORTICAL MICROTUBULE-CAPTURE SITE. DELAYS THE EXIT FROM MITOSIS WHEN THE SPINDLE IS ORIENTED ABNORMALLY.
YIR006C	PAN1	INVOLVED IN ACTIN ORGANIZATION AND ENDOCYTOSIS
YPL253C	VIK1	CIK1P HOMOLOG
YMR242C	RPL20A	RIBOSOMAL PROTEIN L20A (L18A)
YHR141C	RPL42B	RIBOSOMAL PROTEIN L42B (YL27) (L41B) (YP44)
YER074W	RPS24A	RIBOSOMAL PROTEIN S24A
YHR021C	RPS27B	RIBOSOMAL PROTEIN S27B (RP61) (YS20)
YHR016C	YSC84	SH3 DOMAIN IN C-TERMINUS
YBR200W	BEM1	SH3-DOMAIN PROTEIN THAT BINDS CDC24P, STE5P AND STE20P, AND THE RSR1P-BUD2P-BUP5P GTPASE
YIL133C	RPL16A	RIBOSOMAL PROTEIN L16A (L21A) (RP22) (YL15)
YBL092W	RPL32	RIBOSOMAL PROTEIN L32
YDL082W	RPL13A	RIBOSOMAL PROTEIN L13A
YMR230W	RPS10B	RIBOSOMAL PROTEIN S10B
YKR057W	RPS21A	RIBOSOMAL PROTEIN S21A (S26A) (YS25)
YDR130C	FIN1	BASIC PROTEIN WITH PUTATIVE COILED-COIL REGIONS THAT COMPRISES A FILAMENT BETWEEN SPINDLE POLE BODIES SELF-ASSEMBLES INTO FILAMENTS WITH A DIAMETER OF APPROXIMATELY 10 NM
YPL269W	KAR9	CORTICAL PROTEIN REQUIRED FOR CYTOPLASMIC MICROTUBULE ORIENTATION BIM1P AND KAR9P MAKE UP THE CORTICAL MICROTUBULE-CAPTURE SITE. LOCALIZES TO SHMOO TIPS AND THE TIPS OF BUDDING CELLS IN A CELL-CYCLE DEPENDENT MANNER.
YOR233W	KIN4	PROTEIN KINASE
YFR031C-A	RPL2A	RIBOSOMAL PROTEIN L2A (L5A) (RP8) (YL6)
YJR076C	CDC11	10 NM FILAMENT COMPONENT OF MOTHER-BUD NECK
YDL225W	SHS1	COMPONENT OF THE SEPTIN RING OF THE MOTHER-BUD NECK THAT IS REQUIRED FOR CYTOKINESIS SEPTINS RECRUIT PROTEINS TO THE NECK AND CAN ACT AS A BARRIER TO DIFFUSION AT THE MEMBRANE, AND THEY COMPRISE THE 10NM FILAMENTS SEEN WITH EM
YGR179C	OKP1	OUTER KINETOCHORE PROTEIN, REQUIRED FOR ACCURATE MITOTIC CHROMOSOME SEGREGATION FORMS A COMPLEX WITH MCM21P AND OKP1P THAT BINDS TO CENTROMERES VIA THE CBF3 COMPLEX
YDR450W	RPS18A	RIBOSOMAL PROTEIN S18A
YGR113W	DAM1	DUO1 AND MPS1 INTERACTING. LOCALIZED TO INTRANUCLEAR SPINDLES AND SPINDLE POLE BODIES. KEY IPL1P TARGET FOR REGULATING KINETOCHORE-MICROTUBULE ATTACHMENTS.
YOR058C	ASE1	SPINDLE MIDZONE COMPONENT
YKR083C	DAD2	DUO1 AND DAM1 INTERACTING HELPER OF ASK1
YLR353W	BUD8	PROTEIN INVOLVED IN BUD-SITE SELECTION DIPLOID MUTANTS DISPLAY A UNIPOLAR BUDDING PATTERN INSTEAD OF THE WILD-TYPE BIPOLAR PATTERN, AND BUD AT THE PROXIMAL POLE
YBL084C	CDC27	ANAPHASE PROMOTING COMPLEX (APC) SUBUNIT
YGR214W	RPS0A	RIBOSOMAL PROTEIN S0A
YCR031C	RPS14A	RIBOSOMAL PROTEIN S14A (RP59A)
YOR326W	MYO2	CLASS V MYOSIN
YKR037C	SPC34	SPINDLE POLE COMPONENT
YNL225C	CNM67	CHAOTIC NUCLEAR MIGRATION PREDICTED MASS IS 67KDA
YHR107C	CDC12	10 NM FILAMENT COMPONENT OF MOTHER-BUD NECK|SEPTIN
YDR254W	CHL4	PROTEIN NECESSARY FOR STABILITY OF ARS-CEN PLASMIDS SUGGESTED TO BE REQUIRED FOR KINETOCHORE FUNCTION
YIL148W	RPL40A	RIBOSOMAL PROTEIN L40A|ALSO ENCODES A UBIQUITIN PROTEIN
YJL191W	RPS14B	RIBOSOMAL PROTEIN S14B (RP59B)
YBR189W	RPS9B	RIBOSOMAL PROTEIN S9B (S13) (RP21) (YS11)
YHR166C	CDC23	SUBUNIT OF THE ANAPHASE-PROMOTING COMPLEX-CYCLOSOME (APC-C), WHICH IS A UBIQUITIN-PROTEIN LIGASE REQUIRED FOR DEGRADATION OF ANAPHASE INHIBITORS, INCLUDING MITOTIC CYCLINS, DURING THE METAPHASE-ANAPHASE TRANSITION
YDR127W	ARO1	3-DEHYDROQUINATE DEHYDRATASE (3-DEHYDROQUINASE)|3-DEHYDROQUINATE SYNTHASE|EPSP SYNTHASE|PENTAFUNCTIONAL AROM POLYPEPTIDE|SHIKIMATE 5-DEHYDROGENASE|SHIKIMATE KINASE
YPR055W	SEC8	EXOCYST COMPLEX 121 KDA COMPONENT
YLR185W	RPL37A	RIBOSOMAL PROTEIN L37A (L43) (YL35)
YPL090C	RPS6A	RIBOSOMAL PROTEIN S6A (S10A) (RP9) (YS4)
YNL243W	SLA2	TRANSMEMBRANE PROTEIN
YOR304W	ISW2	ATPASE COMPONENT OF A TWO SUBUNIT CHROMATIN REMODELING COMPLEX
YPL242C	IQG1	HOMOLOG OF THE MAMMALIAN IQGAP1 AND 2 GENES PROBABLE REGULATOR OF CELLULAR MORPHOGENESIS, INDUCING ACTIN-RING FORMATION IN ASSOCIATION WITH CYTOKINESIS
YLR325C	RPL38	RIBOSOMAL PROTEIN L38
YHR129C	ARP1	ACTIN-RELATED PROTEIN OF THE DYNACTIN COMPLEX
YDL017W	CDC7	CDC7P-DBF4P KINASE COMPLEX CATALYTIC SUBUNIT
YBR084C-A	RPL19A	RIBOSOMAL PROTEIN L19A (L23A) (RPL5L) (YL14)
YLR381W	CTF3	OUTER KINETOCHORE PROTEIN THAT FORMS A COMPLEX WITH MCM16P AND MCM22P MAY BIND THE KINETOCHORE TO SPINDLE MICROTUBULES
YGR078C	PAC10	BOVINE NABC COMPLEX COMPONENT HOMOLOG|NON-NATIVE ACTIN BINDING COMPLEX POLYPEPTIDE 3
YDR012W	RPL4B	RIBOSOMAL PROTEIN L4B (L2B) (RP2) (YL2)
YDR382W	RPP2B	RIBOSOMAL PROTEIN P2B (YP2BETA) (L45)
YGR059W	SPR3	A SPORULATION-SPECIFIC HOMOLOGUE OF THE YEAST CDC3-10-11-12 FAMILY OF BUD NECK MICROFILAMENT GENES REGULATED BY ABFI
YML124C	TUB3	ALPHA-TUBULIN
YPL174C	NIP100	LARGE SUBUNIT OF DYNACTIN COMPLEX (PUTATIVE)
YMR194W	RPL36A	RIBOSOMAL PROTEIN L36A (L39) (YL39)
YIL052C	RPL34B	RIBOSOMAL PROTEIN L34B
YMR168C	CEP3	CBF3 KINETOCHORE PROTEIN COMPLEX SUBUNIT B
YDR150W	NUM1	CONTAINS VARIABLE NUMBER OF TANDEM REPEATS OF A 64 AMINO-ACID POLYPEPTIDE, POTENTIAL CA2+-BINDING SITE, AND PLECKSTRIN HOMOLOGY DOMAIN
YNL084C	END3	EH DOMAIN-CONTAINING PROTEIN INVOLVED IN ENDOCYTOSIS, ACTIN CYTOSKELETAL ORGANIZATION AND CELL WALL MORPHOGENESIS FORMS A COMPLEX WITH SLA1P AND PAN1P
YAL034W-A	MTW1	MIS TWELVE LIKE (A SCHIZOSACCHAROMYCES POMBE KINETOCHORE PROTEIN)
YGL030W	RPL30	RIBOSOMAL PROTEIN L30 (L32) (RP73) (YL38) LARGE SUBUNIT
YNL301C	RPL18B	RIBOSOMAL PROTEIN L18B (RP28B)
YDR025W	RPS11A	RIBOSOMAL PROTEIN S11A (S18A) (RP41A) (YS12)
YGL170C	SPO74	COMPONENT OF THE MEIOTIC OUTER PLAQUE, A MEMBRANE-ORGANIZING CENTER THAT ASSEMBLES ON THE CYTOPLASMIC FACE OF THE SPINDLE POLE BODY DURING MEIOSIS II AND TRIGGERS THE FORMATION OF THE PROSPORE MEMBRANE
YBL063W	KIP1	KINESIN RELATED PROTEIN
YHR061C	GIC1	GTPASE-INTERACTING COMPONENT 1
YER056C-A	RPL34A	RIBOSOMAL PROTEIN L34A
YLR340W	RPP0	RIBOSOMAL PROTEIN P0 (A0) (L10E)
YML085C	TUB1	ALPHA-TUBULIN
YJR053W	BFA1	BYR FOUR ALIKE
YER117W	RPL23B	RIBOSOMAL PROTEIN L23B (L17AB) (YL32)
YHR172W	SPC97	SPINDLE POLE BODY COMPONENT
YGR188C	BUB1	CHECKPOINT GENE INVOLVED IN PERMITTING ENTRY INTO MITOSIS DEPENDING UPON THE ASSEMBLY STATE OF MICROTUBULES
YLR200W	YKE2	BOVINE NABC COMPLEX COMPONENT HOMOLOG|NON-NATIVE ACTIN BINDING COMPLEX POLYPEPTIDE 6
YKL101W	HSL1	SERINE-THREONINE KINASE
YKR054C	DYN1	HEAVY CHAIN OF CYTOPLASMIC DYNEIN
YDR488C	PAC11	PROTEIN REQUIRED IN THE ABSENCE OF CIN8P
YML073C	RPL6A	RIBOSOMAL PROTEIN L6A (L17A) (RP18) (YL16)
YMR109W	MYO5	MYOSIN I
YIL018W	RPL2B	RIBOSOMAL PROTEIN L2B (L5B) (RP8) (YL6)
YJL008C	CCT8	CHAPERONIN CONTAINING T-COMPLEX SUBUNIT EIGHT COMPONENT
YDL081C	RPP1A	ACIDIC RIBOSOMAL PROTEIN P1A (YP1ALPHA) (A1)
YKL052C	ASK1	ASSOCIATED WITH SPINDLES AND KINETOCHORES
YGL103W	RPL28	RIBOSOMAL PROTEIN L28 (L29) (RP44) (YL24)
YHR023W	MYO1	CLASS II MYOSIN
YLR227C	ADY4	COMPONENT OF THE MEIOTIC OUTER PLAQUE, A MEMBRANE-ORGANIZING CENTER THAT ASSEMBLES ON THE CYTOPLASMIC FACE OF THE SPINDLE POLE BODY DURING MEIOSIS II AND TRIGGERS THE FORMATION OF THE PROSPORE MEMBRANE
YIL106W	MOB1	MPS ONE BINDER
YLR457C	NBP1	NAP1P BINDING PROTEIN
YKL006W	RPL14A	RIBOSOMAL PROTEIN L14A
YNL162W	RPL42A	RIBOSOMAL PROTEIN L42A (YL27) (L41A)
YDR507C	GIN4	SERINE-THREONINE KINASE (PUTATIVE)
YNL079C	TPM1	TROPOMYOSIN I
YIL159W	BNR1	BNI1P-RELATED PROTEIN, HELPS REGULATE REORGANIZATION OF THE ACTIN CYTOSKELETON, POTENTIAL TARGET OF RHO4P
YBR130C	SHE3	CYTOPLASMIC PROTEIN INVOLVED IN MOTHER-SPECIFIC HO EXPRESSION
YDR318W	MCM21	INVOLVED IN MINICHROMOSOME MAINTENANCE
YPL209C	IPL1	PROTEIN KINASE
YDL184C	RPL41A	RIBOSOMAL PROTEIN L41A (YL41) (L47A)
YGL076C	RPL7A	RIBOSOMAL PROTEIN L7A (L6A) (RP11) (YL8)
YIR010W	DSN1	PROTEIN REQUIRED FOR CELL VIABILITY
YNL172W	APC1	UBIQUITIN LIGASE SUBUNIT
YNL223W	ATG4	ANCHOR PROTEIN|MEDIATES ATTACHMENT OF AUTOPHAGOSOMES TO MICROTUBULES
YLR210W	CLB4	B-TYPE CYCLIN
YGR140W	CBF2	CENTROMERE BINDING FACTOR CBF3 110 KDA SUBUNIT
YOR255W		OUTER SPORE WALL
YFR028C	CDC14	PROTEIN PHOSPHATASE
YOR274W	MOD5	TRANSFER RNA ISOPENTENYL TRANSFERASE
YMR092C	AIP1	ACTIN CORTICAL PATCH COMPONENT
YJR089W	BIR1	PROTEIN INVOLVED IN CELL CYCLE REGULATION AND CHROMOSOME SEGREGATION, CONTAINS BIR (BACULOVIRUS INHIBITOR OF APOPTOSIS REPEAT) DOMAIN
YGL181W	GTS1	PUTATIVE ZINC-FINGER TRANSCRIPTION FACTOR WITH GLY-THR-SER REPEATS THAT HOMODIMERIZES, AND REGULATES ULTRADIAN RHYTHM, CELL SIZE, CELL CYCLE, LIFESPAN, SPORULATION, HEAT TOLERANCE, AND MULTIDRUG TRANSPORT SIMILAR TO DROSOPHILA PER PROTEIN
YHL033C	RPL8A	RIBOSOMAL PROTEIN L8A (RP6) (YL5) (L4A)
YPL081W	RPS9A	RIBOSOMAL PROTEIN S9A (S13) (RP21) (YS11)
YOR373W	NUD1	SPINDLE POLE BODY PROTEIN
YLR144C	ACF2	GLUCAN-HYDROLYZING PROTEIN THAT SPECIFICALLY ACTS ON 1,3-BETA LINKAGES, WITH AN ENDOLYTIC MODE OF ACTION. NECESSARY FOR ACTIN POLYMERIZATION IN PERMEABILIZED CELLS.
YBR233W-A	DAD3	IDENTIFIED BY HOMOLOGY. SEE FEBS LETTERS [2000] 487:31-36.
YGL189C	RPS26A	RIBOSOMAL PROTEIN S26A
YNL106C	INP52	INOSITOL POLYPHOSPHATE 5-PHOSPHATASE
YBR156C	SLI15	MITOTIC SPINDLE PROTEIN INVOLVED IN CHROMOSOME SEGREGATION.
YJL177W	RPL17B	RIBOSOMAL PROTEIN L17B (L20B) (YL17)
YKL042W	SPC42	SPINDLE POLE BODY COMPONENT
YHL007C	STE20	INVOLVED IN PHEROMONE RESPONSE AND PSEUDOHYPHAL GROWTH PATHWAYS
YER018C	SPC25	SPINDLE POLE COMPONENT
YOR239W	ABP140	ACTIN FILAMENT BINDING PROTEIN
YOR129C		HYPOTHETICAL ORF
YGL216W	KIP3	KINESIN-RELATED PROTEIN
YIR003W		HYPOTHETICAL ORF
YDL226C	GCS1	ADP-RIBOSYLATION FACTOR GTPASE-ACTIVATING PROTEIN (ARF GAP)
YDR388W	RVS167	CYTOSKELETAL PROTEIN (PUTATIVE)
YBR107C	IML3	INCREASE MINICHROMOSOME LOSS
YLR441C	RPS1A	RIBOSOMAL PROTEIN S1A (RP10A)
YDR113C	PDS1	42 KDA NUCLEAR SECURIN
YLR212C	TUB4	GAMMA TUBULIN
YFR032C-A	RPL29	RIBOSOMAL PROTEIN L29 (YL43)
YNL007C	SIS1	HSP40 FAMILY CHAPERONE
YOR177C	MPC54	COMPONENT OF THE MEIOTIC OUTER PLAQUE, A MEMBRANE-ORGANIZING CENTER WHICH IS ASSEMBLED ON THE CYTOPLASMIC FACE OF THE SPINDLE POLE BODY DURING MEIOSIS II AND TRIGGERS THE FORMATION OF THE PROSPORE MEMBRANE
YBL087C	RPL23A	RIBOSOMAL PROTEIN L23A (L17AA) (YL32)
YDR064W	RPS13	RIBOSOMAL PROTEIN S13 (S27A) (YS15)
YOR182C	RPS30B	RIBOSOMAL PROTEIN S30B
YJR123W	RPS5	RIBOSOMAL PROTEIN S5 (S2) (RP14) (YS8)
YOR109W	INP53	INOSITOL POLYPHOSPHATE 5-PHOSPHATASE
YJR090C	GRR1	F-BOX PROTEIN COMPONENT OF THE SCF UBIQUITIN-LIGASE COMPLEX, REQUIRED FOR CLN1P AND CLN2P DEGRADATION INVOLVED IN CARBON CATABOLITE REPRESSION, GLUCOSE-DEPENDENT DIVALENT CATION TRANSPORT, HIGH-AFFINITY GLUCOSE TRANSPORT, AND MORPHOGENESIS
YCR009C	RVS161	PROTEIN REQUIRED FOR VIABILITY AFTER N, C, OR S STARVATION. THE BAR ADAPTOR PROTEINS ENCODED BY RVS167 AND RVS161 FORM A COMPLEX THAT REGULATES ACTIN, ENDOCYTOSIS, AND VIABILITY FOLLOWING STARVATION OR OSMOTIC STRESS.
YGL135W	RPL1B	RIBOSOMAL PROTEIN L1B
YLR061W	RPL22A	RIBOSOMAL PROTEIN L22A (L1C) (RP4) (YL31)
YDR389W	SAC7	GTPASE ACTIVATING PROTEIN (GAP) FOR RHO1
YGR027C	RPS25A	RIBOSOMAL PROTEIN S25A (S31A) (RP45) (YS23)
YNL148C	ALF1	TUBULIN FOLDING COFACTOR B
YIL062C	ARC15	ARP COMPLEX SUBUNIT
YJR135C	MCM22	REQUIRED FOR MAINTENANCE OF CHROMOSOMES AND MINICHROMOSOMES
YDR471W	RPL27B	RIBOSOMAL PROTEIN L27B
YNL153C	GIM3	BOVINE PREFOLDIN SUBUNIT 4 HOMOLOG (PUTATIVE)
YJR145C	RPS4A	RIBOSOMAL PROTEIN S4A (YS6) (RP5) (S7A)
YNL096C	RPS7B	RIBOSOMAL PROTEIN S7B (RP30)
YPR046W	MCM16	INVOLVED IN A NONESSENTIAL ROLE THAT GOVERNS THE KINETOCHORE-MICROTUBULE MEDIATED PROCESS OF CHROMOSOME SEGREGATION
YNL126W	SPC98	SPINDLE POLE BODY COMPONENT
YJR112W	NNF1	SPINDLE POLE PROTEIN, REQUIRED FOR ACCURATE CHROMOSOME SEGREGATION
YIL118W	RHO3	GTP-BINDING PROTEIN|RAS HOMOLOG
YDR356W	SPC110	INTERACTS WITH SPC42P, CALMODULIN, AND A 35 KDA PROTEIN|SPINDLE POLE BODY COMPONENT
YFL037W	TUB2	BETA-TUBULIN
YJL111W	CCT7	CHAPERONIN CONTAINING T-COMPLEX SUBUNIT SEVEN COMPONENT
YIL144W	TID3	PRODUCT OF GENE UNKNOWN
YDR201W	SPC19	SPINDLE POLE COMPONENT
YNR035C	ARC35	ARP COMPLEX SUBUNIT
YPR141C	KAR3	KINESIN-LIKE NUCLEAR FUSION PROTEIN
YPL220W	RPL1A	RIBOSOMAL PROTEIN L1A, FORMS PART OF THE 60S RIBOSOMAL SUBUNIT
YIL034C	CAP2	CAPPING PROTEIN BETA SUBUNIT
YGL061C	DUO1	DEATH UPON OVEREXPRESSION
YLR333C	RPS25B	RIBOSOMAL PROTEIN S25B (S31B) (RP45) (YS23)
YOR349W	CIN1	TUBULIN FOLDING COFACTOR D
YDR212W	TCP1	CHAPERONIN SUBUNIT ALPHA
YHR114W	BZZ1	ASSOCIATED WITH LAS17P-BEE1P
YDR424C	DYN2	DYNEIN LIGHT CHAIN (PUTATIVE)
YMR116C	ASC1	G-BETA LIKE PROTEIN
YML063W	RPS1B	RIBOSOMAL PROTEIN S1B (RP10B)
YGL075C	MPS2	MONOPOLAR SPINDLE TWO, ENCODES A MEMBRANE PROTEIN LOCALIZED AT THE NUCLEAR ENVELOPE AND THE SPINDLE POLE BODY THROUGHOUT THE CELL CYCLE. THE PROTEIN IS APPROXIMATELY 45 KDA, AND CONTAINS A COILED-COIL MOTIF AND A HYDROPHOBIC DOMAIN.
YAL041W	CDC24	GUANINE NUCLEOTIDE EXCHANGE FACTOR (A.K.A. GDP-RELEASE FACTOR) FOR CDC42
YLR113W	HOG1	MAP KINASE
YCR088W	ABP1	ACTIN BINDING PROTEIN
YLR287C-A	RPS30A	RIBOSOMAL PROTEIN S30A
YJL030W	MAD2	SPINDLE CHECKPOINT COMPLEX SUBUNIT
YLR429W	CRN1	DICTYOSTELIUM AND HUMAN ACTIN-BINDING PROTEIN CORONIN HOMOLOG
YJL014W	CCT3	GAMMA CHAPERONIN SUBUNIT
YBR181C	RPS6B	RIBOSOMAL GENE PRODUCT S6B (S10B) (RP9) (YS4)
YMR117C	SPC24	SPINDLE POLE COMPONENT
YJR065C	ARP3	ACTIN-RELATED GENE
YJL124C	LSM1	LIKE SM PROTEIN THE FINDING THAT LSM1 CONTAINS THE SM CONSENSUS MOTIFS AND MOST CLOSELY RESEMBLES SM-B HAS BEEN CONTROVERSIAL (FROMONT-RACINE ET AL, 1997 NATURE GENETICS 16:277-282, AND BERTRAND SERAPHIN, PERSONAL COMMUNICATION).
YDL029W	ARP2	ACTIN RELATED PROTEIN
YGR034W	RPL26B	RIBOSOMAL PROTEIN L26B (L33B) (YL33)
YDR085C	AFR1	CYTOSKELETAL PROTEIN|SIMILAR TO ARRESTINS
YKR094C	RPL40B	RIBOSOMAL PROTEIN L40B|ALSO ENCODES A UBIQUITIN PROTEIN
YCL024W	KCC4	S. POMBE NIM1 HOMOLOG|PROTEIN KINASE
YDR283C	GCN2	EUKARYOTIC INITIATION FACTOR 2 ALPHA (EIF2-ALPHA) KINASE
YKL068W	NUP100	NUCLEAR PORE COMPLEX SUBUNIT
YLR009W	RLP24	PART OF A PRE-60S COMPLEX
YLR167W	RPS31	RIBOSOMAL PROTEIN S31 (S37) (YS24)|ALSO ENCODES A UBIQUITIN PROTEIN
YAL047C	SPC72	SPC72P INTERACTS WITH STU2P IN THE TWO-HYBRID ASSAY SPC72P LOCALIZES TO THE SPINDLE POLE BODIES. MOLECULAR WEIGHT IS 72 KD
YGL093W	SPC105	SPINDLE POLE COMPONENT
YKL007W	CAP1	CAPPING PROTEIN
YNL138W	SRV2	70 KDA ADENYLYL CYCLASE-ASSOCIATED PROTEIN
YAR019C	CDC15	PROTEIN KINASE DOMAIN
YHR170W	NMD3	FACTOR REQUIRED FOR A LATE ASSEMBLY STEP OF THE 60S SUBUNIT
YIL142W	CCT2	SUBUNIT BETA OF THE CYTOSOLIC CHAPERONIN CCT RING COMPLEX, RELATED TO TCP1P, REQUIRED FOR THE ASSEMBLY OF ACTIN AND TUBULINS IN VIVO
YBR234C	ARC40	ARP2-3 COMPLEX SUBUNIT, 40 KILODALTON
YLR448W	RPL6B	RIBOSOMAL PROTEIN L6B (L17B) (RP18) (YL16)
YBL061C	SKT5	PROTOPLAST REGENERATION AND KILLER TOXIN RESISTANCE GENE, MAY BE A POST-TRANSLATIONAL REGULATOR OF CHITIN SYNTHASE III ACTIVITY, INTERACTS WITH CHS3P
YDL191W	RPL35A	RIBOSOMAL PROTEIN L35A
YLR315W	NKP2
YGR270W	YTA7	MEMBER OF CDC48-PAS1-SEC18 FAMILY OF ATPASES
YKL048C	ELM1	PROTEIN KINASE
YMR121C	RPL15B	RIBOSOMAL PROTEIN L15B (YL10) (L13B) (RP15R)
YFL009W	CDC4	UBIQUITIN LIGASE SUBUNIT
YOR367W	SCP1	CALPONIN HOMOLOG
YDL161W	ENT1	EPSIN-LIKE PROTEIN INVOLVED IN ENDOCYTOSIS AND ACTIN PATCH ASSEMBLY AND FUNCTIONALLY REDUNDANT WITH ENT2P BINDS CLATHRIN VIA A CLATHRIN-BINDING DOMAIN MOTIF AT C-TERMINUS
YDR447C	RPS17B	RIBOSOMAL PROTEIN S17B (RP51B)
YDL136W	RPL35B	RIBOSOMAL PROTEIN L35B
YDR188W	CCT6	SUBUNIT OF THE CYTOSOLIC CHAPERONIN CCT RING COMPLEX, RELATED TO TCP1P, REQUIRED FOR THE ASSEMBLY OF ACTIN AND TUBULINS IN VIVO
YER006W	NUG1	NUCLEAR GTPASE INVOLVED IN RIBOSOME BIOGENESIS
YDR418W	RPL12B	RIBOSOMAL PROTEIN L12B (L15B) (YL23)
YOR272W	YTM1	MICROTUBULE-ASSOCIATED PROTEIN
YAL029C	MYO4	MYOSIN V HEAVY CHAIN
YNL298W	CLA4	STE20P HOMOLOG|PROTEIN KINASE
YLR337C	VRP1	PROLINE-RICH PROTEIN VERPROLIN
YOR269W	PAC1	REQUIRED FOR VIABILITY IN THE ABSENCE OF THE KINESIN-RELATED CIN8P MITOTIC MOTOR.
YCL029C	BIK1	MICROTUBULE-ASSOCIATED PROTEIN REQUIRED FOR MICROTUBULE FUNCTION DURING MATING AND MITOSIS
YNL069C	RPL16B	RIBOSOMAL PROTEIN L16B (L21B) (RP23) (YL15)
YPL079W	RPL21B	RIBOSOMAL PROTEIN L21B
YMR138W	CIN4	GTP-BINDING PROTEIN
YGL240W	DOC1	PROCESSIVITY FACTOR REQUIRED FOR THE UBIQUITINATION ACTIVITY OF THE ANAPHASE PROMOTING COMPLEX (APC), MEDIATES THE ACTIVITY OF THE APC BY CONTRIBUTING TO SUBSTRATE RECOGNITION INVOLVED IN CYCLIN PROTEOLYSIS
YGR098C	ESP1	SEPARASE
YAL024C	LTE1	GDP-GTP EXCHANGE FACTOR REQUIRED FOR GROWTH AT LOW TEMPERATURES
YHR203C	RPS4B	RIBOSOMAL PROTEIN S4B (YS6) (RP5) (S7B)
YIL095W	PRK1	SERINE-THREONINE PROTEIN KINASE
YDL143W	CCT4	SUBUNIT OF THE CYTOSOLIC CHAPERONIN CCT RING COMPLEX, RELATED TO TCP1P, REQUIRED FOR THE ASSEMBLY OF ACTIN AND TUBULINS IN VIVO
YOL127W	RPL25	RIBOSOMAL PROTEIN L25 (RPL6L) (YL25)
YCR002C	CDC10	SEPTIN
YHR193C	EGD2	GAL4 ENHANCER PROTEIN|NASCENT-POLYPEPTIDE-ASSOCIATED COMPLEX HUMAN ALPHA NAC SUBUNIT HOMOLOG
YGR070W	ROM1	GDP-GTP EXCHANGE PROTEIN (GEP) FOR RHO1P MUTATIONS ARE SYNTHETICALLY LETHAL WITH MUTATIONS IN ROM2, WHICH ALSO ENCODES A GEP
YEL054C	RPL12A	RIBOSOMAL PROTEIN L12A (L15A) (YL23)
YGR092W	DBF2	KINASE REQUIRED FOR LATE NUCLEAR DIVISION. CDC15 PROMOTES THE EXIT FROM MITOSIS BY DIRECTLY SWITCHING ON THE KINASE ACTIVITY OF DBF2.
YNL090W	RHO2	GTP-BINDING PROTEIN|RHO SUBFAMILY
YLR075W	RPL10	RIBOSOMAL PROTEIN L10
YJR094W-A	RPL43B	RIBOSOMAL PROTEIN L43B
YLR313C	SPH1	SPA2P HOMOLOG
YDR500C	RPL37B	RIBOSOMAL PROTEIN L37B (L43) (YL35)
YIL138C	TPM2	TROPOMYOSIN ISOFORM II
YLL003W	SFI1	PRODUCT OF GENE UNKNOWN
YLR370C	ARC18	ARP2-3 COMPLEX SUBUNIT
YGL106W	MLC1	MYOSIN MYO2P LIGHT CHAIN
YPL211W	NIP7	NIP7P IS REQUIRED FOR 60S RIBOSOME SUBUNIT BIOGENESIS
YOR096W	RPS7A	RIBOSOMAL PROTEIN S7A (RP30)
YDL130W	RPP1B	RIBOSOMAL PROTEIN P1B (L44) (YP1BETA) (AX)
YLR192C	HCR1	SUBSTOICHIOMETRIC COMPONENT OF EUKARYOTIC TRANSLATION INITIATION FACTOR 3 (EIF3)
YBL034C	STU1	SUPPRESSOR OF COLD-SENSITIVE TUB2 MUTATION. STU1P BINDS TO INTERPOLAR MICROTUBULES OF THE MITOTIC SPINDLE AND PLAYS AN ESSENTIAL ROLE IN THEIR ABILITY TO PROVIDE AN OUTWARD FORCE ON THE SPINDLE POLES.
YBR031W	RPL4A	RIBOSOMAL PROTEIN L4A (L2A) (RP2) (YL2)
YOL121C	RPS19A	RIBOSOMAL PROTEIN S19A (S16AA) (RP55A) (YS16A)
YDR101C	ARX1
YPL198W	RPL7B	RIBOSOMAL PROTEIN L7B (L6B) (RP11) (YL8)
YJR064W	CCT5	CHAPERONIN SUBUNIT EPSILON SUBUNIT
YFR024C-A	LSB3	LAS17 BINDING PROTEIN
YOR057W	SGT1	G2 ALLELE OF SKP1 SUPPRESSOR SUBUNIT OF SCF UBIQUITIN LIGASE COMPLEX ESSENTIAL REGULATOR OF CELL CYCLE ESSENTIAL COMPONENT OF KINETOCHORE ASSEMBLY PATHWAY.
YOR234C	RPL33B	RIBOSOMAL PROTEIN L33B (L37B) (RP47) (YL37)
YNL016W	PUB1	POLY(A) BINDING PROTEIN
YKL013C	ARC19	ARP COMPLEX SUBUNIT
YPL093W	NOG1	HOMOLOGS IDENTIFIED IN HUMAN AND TRYPANOSOMA BRUCEI|NUCLEOLAR G-PROTEIN (PUTATIVE)
YNL067W	RPL9B	RIBOSOMAL PROTEIN L9B (L8B) (RP24) (YL11)
YGR080W	TWF1	TWINFILIN A, AN ACTIN MONOMER SEQUESTERING PROTEIN
YFL039C	ACT1	ACTIN
YFL034C-A	RPL22B	RIBOSOMAL PROTEIN L22B (L1C) (RP4) (YL31)
YLR244C	MAP1	METHIONINE AMINOPEPTIDASE
YBL078C	ATG8	SIMILAR TO LC3, A MICROTUBULE-ASSOCIATED PROTEIN FROM RAT
YLL050C	COF1	ACTIN BINDING AND SEVERING PROTEIN|COFILIN
YOR265W	RBL2	TUBULIN FOLDING COFACTOR A
YKL156W	RPS27A	RIBOSOMAL PROTEIN S27A (RP61) (YS20)
YBR118W	TEF2	TRANSLATIONAL ELONGATION FACTOR EF-1 ALPHA
YPR132W	RPS23B	RIBOSOMAL PROTEIN S23B (S28B) (RP37) (YS14)
YPL037C	EGD1	POL II TRANSCRIBED GENES REGULATOR
YOR167C	RPS28A	RIBOSOMAL PROTEIN S28A (S33A) (YS27)
YFR036W	CDC26	SUBUNIT OF THE ANAPHASE-PROMOTING COMPLEX-CYCLOSOME (APC-C), WHICH IS A UBIQUITIN-PROTEIN LIGASE REQUIRED FOR DEGRADATION OF ANAPHASE INHIBITORS, INCLUDING MITOTIC CYCLINS, DURING THE METAPHASE-ANAPHASE TRANSITION
YPR165W	RHO1	GTP-BINDING PROTEIN|RHO SUBFAMILY
YMR299C		PROTEIN OF UNKNOWN FUNCTION GREEN FLUORESCENT PROTEIN (GFP)-FUSION PROTEIN LOCALIZES TO THE CYTOPLASM IN A PUNCTATE PATTERN
YMR055C	BUB2	PROTEIN REQUIRED FOR CELL CYCLE ARREST IN RESPONSE TO LOSS OF MICROTUBULE FUNCTION
YBR109C	CMD1	CALMODULIN
YLR048W	RPS0B	RIBOSOMAL PROTEIN S0B
YGR118W	RPS23A	RIBOSOMAL PROTEIN S23A (S28A) (RP37) (YS14)
YGL120C	PRP43	RNA HELICASE
YPR080W	TEF1	TRANSLATIONAL ELONGATION FACTOR EF-1 ALPHA
YOR195W	SLK19	LEUCINE ZIPPER (PUTATIVE)
YHL001W	RPL14B	RIBOSOMAL PROTEIN L14B
YER133W	GLC7	PROTEIN PHOSPHATASE TYPE I
YDR320C-A	DAD4
YMR205C	PFK2	PHOSPHOFRUCTOKINASE BETA SUBUNIT
YER126C	NSA2	RIBOSOME BIOGENESIS
YIR012W	SQT1	INVOLVED IN A LATE STEP OF 60S RIBOSOMAL SUBUNIT ASSEMBLY OR MODIFICATION CONTAINS MULTIPLE WD REPEATS INTERACTS WITH QSR1P
YOR122C	PFY1	PROFILIN
YLR058C	SHM2	SERINE HYDROXYMETHYLTRANSFERASE
YLR264W	RPS28B	RIBOSOMAL PROTEIN S28B (S33B) (YS27)
YHR174W	ENO2	ENOLASE
YGR254W	ENO1	ENOLASE I
